# Supplementary material
Source: publisher figshare collection journal article supplement (https://acs.figshare.com/ndownloader/files/6059184)
Supplement: Supplementary file 1 [file 6059184]

71
REACTION A. REACTANT, B3LYP-D2, 
G_raw (298.15 K) =    -1856.798095 Hartree
N       0.001213    1.619919   -0.129139 
C      -1.167146    2.296357   -0.187071 
C      -1.211580    3.681659   -0.249617 
C      -0.000158    4.368316   -0.256610 
C       1.211959    3.685101   -0.205523 
C       1.168957    2.299516   -0.144751 
O      -2.310362    1.581569   -0.193447 
P      -2.260630   -0.128471    0.001942 
C      -3.265062   -0.664891   -1.462995 
C      -4.515811    0.191116   -1.709917 
O       2.313067    1.587965   -0.109632 
P       2.261639   -0.128981    0.013952 
C       3.115023   -0.415996    1.639034 
C       4.627481   -0.168461    1.599188 
Ir      0.001887   -0.514070   -0.045232 
C       3.250304   -0.595894   -1.486073 
C       3.585315   -2.092546   -1.370691 
C       2.302460   -0.365117   -2.681855 
C       4.517711    0.247001   -1.689334 
C      -3.101596   -0.337431    1.646224 
C      -4.610963   -0.071444    1.607594 
C      -2.431558    0.659969    2.611125 
C      -2.812473   -1.774119    2.118621 
C       2.464924    0.541667    2.655451 
C       2.813408   -1.869920    2.048234 
C      -2.317344   -0.538176   -2.673909 
C      -3.628442   -2.145136   -1.255424 
H      -4.977839   -0.148991   -2.642514 
H      -4.253247    1.245439   -1.819850 
H      -5.250304    0.092648   -0.912188 
H      -2.880879   -0.779862   -3.580439 
H      -1.481261   -1.239374   -2.601380 
H      -1.928231    0.478787   -2.778953 
H      -4.073338   -2.523463   -2.181000 
H      -4.356934   -2.274060   -0.452670 
H      -2.742258   -2.747599   -1.033183 
H      -4.994281   -0.119063    2.631856 
H      -5.138655   -0.822161    1.016894 
H      -4.832013    0.920177    1.205745 
H      -2.813451    0.464374    3.617595 
H      -2.670759    1.691529    2.344285 
H      -1.345223    0.543051    2.628130 
H      -3.247096   -1.898390    3.115555 
H      -1.738078   -1.959539    2.176597 
H      -3.258267   -2.521785    1.459281 
H       5.017839   -0.268394    2.616997 
H       4.860283    0.836756    1.240347 
H       5.138844   -0.899971    0.971136 
H       2.868127    0.307805    3.645335 
H       1.379916    0.418327    2.691038 
H       2.695076    1.583619    2.423597 
H       3.267386   -2.048132    3.028151 
H       3.233928   -2.590835    1.343729 
H       1.737672   -2.042241    2.120500 
H       4.024645   -2.422033   -2.317359 
H       2.689792   -2.692967   -1.183621 
H       4.311535   -2.281843   -0.577046 
H       2.847101   -0.597950   -3.602175 
H       1.974409    0.676730   -2.737643 
H       1.424925   -1.015630   -2.639165 
H       4.958556   -0.034258   -2.651443 
H       5.261010    0.073318   -0.913395 
H       4.278467    1.312089   -1.719147 
H       2.165753    4.192232   -0.213320 
H      -2.165799    4.186270   -0.291642 
H      -0.000721    5.450306   -0.304225 
C      -0.014568   -2.623259   -0.132130 
H       0.890763   -3.092252    0.265834 
H      -0.869415   -3.078833    0.378753 
H      -0.086756   -2.909582   -1.195513 
H       0.003134   -0.564644    1.482145 

71
REACTION A. REACTANT, PBE-D2, 
G_raw (298.15 K) =    -1855.010359 Hartree
N       0.001718    1.609590   -0.130348 
C      -1.173450    2.295956   -0.188332 
C      -1.214551    3.688766   -0.251653 
C       0.000676    4.379174   -0.259368 
C       1.216419    3.691952   -0.207360 
C       1.176457    2.298879   -0.145459 
O      -2.325753    1.588954   -0.194506 
P      -2.252754   -0.141083    0.004328 
C      -3.265383   -0.672638   -1.471023 
C      -4.514309    0.188088   -1.712680 
O       2.329297    1.594940   -0.108504 
P       2.253530   -0.142531    0.016322 
C       3.110466   -0.422370    1.653183 
C       4.621762   -0.163842    1.610993 
Ir      0.002043   -0.507836   -0.049246 
C       3.252694   -0.602854   -1.492959 
C       3.585769   -2.100724   -1.376854 
C       2.299799   -0.363669   -2.683964 
C       4.518674    0.244755   -1.687745 
C      -3.099807   -0.341328    1.659335 
C      -4.607804   -0.064383    1.615122 
C      -2.419168    0.658797    2.614594 
C      -2.815021   -1.779483    2.131839 
C       2.448550    0.537852    2.660112 
C       2.812034   -1.878208    2.060260 
C      -2.310489   -0.540361   -2.676552 
C      -3.625713   -2.154052   -1.260765 
H      -4.979634   -0.148150   -2.654629 
H      -4.249539    1.250473   -1.818417 
H      -5.256686    0.085613   -0.911313 
H      -2.873324   -0.780785   -3.593970 
H      -1.468205   -1.247383   -2.604278 
H      -1.918871    0.484497   -2.778760 
H      -4.072383   -2.538690   -2.192624 
H      -4.360756   -2.285552   -0.452955 
H      -2.732126   -2.760012   -1.036294 
H      -4.996857   -0.104732    2.646299 
H      -5.145756   -0.819672    1.023848 
H      -4.823268    0.934863    1.207425 
H      -2.794274    0.465491    3.632977 
H      -2.659455    1.698213    2.346313 
H      -1.323884    0.540010    2.623787 
H      -3.246720   -1.901243    3.139369 
H      -1.732941   -1.973263    2.185810 
H      -3.272197   -2.533305    1.473529 
H       5.016359   -0.258859    2.636447 
H       4.849635    0.849898    1.248723 
H       5.144242   -0.898959    0.981624 
H       2.844630    0.305858    3.662360 
H       1.354496    0.412299    2.687438 
H       2.679313    1.587824    2.427281 
H       3.263039   -2.056212    3.050737 
H       3.243699   -2.604366    1.354974 
H       1.728147   -2.057742    2.127354 
H       4.028817   -2.433925   -2.330021 
H       2.683724   -2.706643   -1.190011 
H       4.317703   -2.293404   -0.577620 
H       2.844412   -0.595854   -3.614490 
H       1.973092    0.687145   -2.736550 
H       1.413412   -1.016612   -2.644118 
H       4.963907   -0.030303   -2.658976 
H       5.269025    0.065035   -0.908225 
H       4.277399    1.317626   -1.711316 
H       2.178332    4.201698   -0.214778 
H      -2.176798    4.196170   -0.293589 
H       0.000248    5.469410   -0.307925 
C      -0.017991   -2.611306   -0.140774 
H       0.897592   -3.088852    0.244010 
H      -0.874395   -3.072352    0.378809 
H      -0.105120   -2.886636   -1.214238 
H       0.004956   -0.573333    1.484992 

71
REACTION A. REACTANT, PBE-D3BJ, 
G_raw (298.15 K) =   -1854.999077 Hartree
N       0.003345    1.589978   -0.122358 
C      -1.169902    2.276977   -0.176130 
C      -1.210839    3.669356   -0.242827 
C       0.003258    4.359838   -0.255257 
C       1.217354    3.671509   -0.202599 
C       1.176559    2.278941   -0.137658 
O      -2.321803    1.572019   -0.170211 
P      -2.264783   -0.158859    0.013339 
C      -3.288838   -0.644415   -1.489791 
C      -4.504335    0.265088   -1.726624 
O       2.328148    1.575791   -0.094329 
P       2.266776   -0.160977    0.022265 
C       3.151907   -0.416299    1.665097 
C       4.651046   -0.093204    1.607699 
Ir      0.002592   -0.525313   -0.047595 
C       3.274890   -0.584355   -1.510512 
C       3.658629   -2.071927   -1.428554 
C       2.305594   -0.355447   -2.689930 
C       4.513501    0.304543   -1.701036 
C      -3.142011   -0.343527    1.670715 
C      -4.637081   -0.001661    1.607985 
C      -2.440468    0.623810    2.644635 
C      -2.927187   -1.794227    2.140696 
C       2.466937    0.520053    2.679714 
C       2.919230   -1.881642    2.078685 
C      -2.318457   -0.517210   -2.683194 
C      -3.709440   -2.114958   -1.320949 
H      -4.967252   -0.026827   -2.683469 
H      -4.209226    1.320799   -1.799850 
H      -5.266694    0.167383   -0.944964 
H      -2.870709   -0.738365   -3.610783 
H      -1.488722   -1.236706   -2.612735 
H      -1.908501    0.500070   -2.775998 
H      -4.163966   -2.460345   -2.263334 
H      -4.456267   -2.243243   -0.524984 
H      -2.848629   -2.767376   -1.107660 
H      -5.043236   -0.031003    2.632132 
H      -5.205645   -0.725879    1.008539 
H      -4.808083    1.008346    1.209004 
H      -2.849598    0.452580    3.652863 
H      -2.621343    1.674034    2.376501 
H      -1.354209    0.454449    2.689227 
H      -3.393342   -1.911536    3.132110 
H      -1.857941   -2.031315    2.234295 
H      -3.388587   -2.529739    1.466653 
H       5.060979   -0.166483    2.628070 
H       4.835302    0.928245    1.245644 
H       5.206227   -0.803238    0.979386 
H       2.886964    0.312857    3.676666 
H       1.380948    0.351184    2.731370 
H       2.647340    1.578120    2.444452 
H       3.395371   -2.046892    3.058470 
H       3.360783   -2.595641    1.368904 
H       1.847166   -2.104646    2.174898 
H       4.116880   -2.370291   -2.385097 
H       2.780953   -2.715622   -1.263969 
H       4.393393   -2.265397   -0.633747 
H       2.839115   -0.573160   -3.629232 
H       1.958139    0.687638   -2.739645 
H       1.432119   -1.023184   -2.645233 
H       4.953904    0.070355   -2.684161 
H       5.283802    0.126640   -0.941954 
H       4.249065    1.370871   -1.693274 
H       2.179561    4.179906   -0.210979 
H      -2.173088    4.176176   -0.282400 
H       0.003236    5.449572   -0.306643 
C      -0.017565   -2.622797   -0.149760 
H       0.902268   -3.104257    0.212918 
H      -0.863841   -3.089924    0.375853 
H      -0.121163   -2.879893   -1.223904 
H       0.006206   -0.604646    1.487226 

71
REACTION A. REACTANT, B3LYP-D3, 
G_raw (298.15 K) =    -1856.735212 Hartree
N       0.000282    1.594335   -0.142269 
C      -1.165867    2.273620   -0.172094 
C      -1.209798    3.658510   -0.248080 
C       0.000792    4.343402   -0.296229 
C       1.211155    3.656776   -0.269969 
C       1.166724    2.272043   -0.192934 
O      -2.310716    1.564730   -0.131501 
P      -2.280305   -0.148738    0.019575 
C      -3.292406   -0.606785   -1.497505 
C      -4.503232    0.313356   -1.731382 
O       2.311338    1.561445   -0.172336 
P       2.280516   -0.148517    0.014355 
C       3.158065   -0.331159    1.668081 
C       4.656903    0.000979    1.607101 
Ir     -0.000391   -0.538840   -0.037043 
C       3.296205   -0.639666   -1.488324 
C       3.718897   -2.111751   -1.329155 
C       2.327463   -0.510239   -2.685217 
C       4.515615    0.266003   -1.733359 
C      -3.163805   -0.366784    1.665260 
C      -4.660380   -0.024472    1.606831 
C      -2.471660    0.577727    2.670863 
C      -2.955400   -1.827871    2.110652 
C       2.468648    0.644016    2.646364 
C       2.941984   -1.779568    2.149857 
C      -2.316470   -0.462951   -2.686959 
C      -3.729536   -2.077620   -1.370486 
H      -4.956757    0.043185   -2.689890 
H      -4.205442    1.361480   -1.782206 
H      -5.268771    0.206724   -0.965686 
H      -2.861015   -0.661463   -3.614403 
H      -1.496393   -1.182588   -2.629089 
H      -1.902434    0.545969   -2.757728 
H      -4.178726   -2.390788   -2.317300 
H      -4.477506   -2.219458   -0.589100 
H      -2.883523   -2.740096   -1.170923 
H      -5.069839   -0.083671    2.619581 
H      -5.221342   -0.725487    0.988118 
H      -4.829634    0.989090    1.238568 
H      -2.909557    0.407172    3.658161 
H      -2.623070    1.626457    2.410588 
H      -1.399635    0.387682    2.746035 
H      -3.427526   -1.963540    3.087875 
H      -1.895573   -2.067133    2.208310 
H      -3.408405   -2.544616    1.423679 
H       5.061199   -0.033009    2.623119 
H       4.834039    1.003122    1.212268 
H       5.216342   -0.720042    1.010353 
H       2.888080    0.482908    3.643199 
H       1.391654    0.478662    2.708276 
H       2.645565    1.684566    2.369676 
H       3.414512   -1.893183    3.129673 
H       3.390900   -2.515459    1.480585 
H       1.881491   -2.012469    2.254672 
H       4.165272   -2.450302   -2.268498 
H       2.866117   -2.761004   -1.114878 
H       4.465078   -2.243408   -0.544270 
H       2.875593   -0.727246   -3.606360 
H       1.920061    0.499993   -2.774242 
H       1.502392   -1.223469   -2.620023 
H       4.969078   -0.022739   -2.686405 
H       5.278214    0.164375   -0.964166 
H       4.226878    1.315787   -1.801023 
H       2.166566    4.159096   -0.305844 
H      -2.165023    4.162114   -0.267069 
H       0.000992    5.424723   -0.354755 
C       0.007105   -2.644698   -0.120268 
H       0.861496   -3.109040    0.378621 
H      -0.895812   -3.114269    0.277563 
H       0.070048   -2.915135   -1.186027 
H      -0.001627   -0.580964    1.492603 

71
REACTION A. REACTANT, M06L-D3, 
G_raw (298.15 K) =    -1856.457797 Hartree
N      -0.001615    1.583975   -0.167201 
C      -1.166332    2.262402   -0.217414 
C      -1.211279    3.645848   -0.295252 
C      -0.003290    4.330012   -0.324119 
C       1.205570    3.648340   -0.277833 
C       1.162320    2.264750   -0.200282 
O      -2.305569    1.553817   -0.197176 
P      -2.266839   -0.149836    0.014364 
C      -3.278823   -0.650170   -1.474527 
C      -4.488674    0.246581   -1.735808 
O       2.302516    1.558651   -0.162818 
P       2.265630   -0.148474    0.018915 
C       3.163460   -0.325597    1.647287 
C       4.653302   -0.001736    1.563640 
Ir     -0.000007   -0.553922   -0.025810 
C       3.274682   -0.620878   -1.483124 
C       3.716819   -2.076872   -1.323053 
C       2.301919   -0.512002   -2.666360 
C       4.471472    0.294422   -1.740007 
C      -3.156318   -0.296972    1.650490 
C      -4.650493    0.005680    1.567365 
C      -2.497382    0.708632    2.602609 
C      -2.923500   -1.719670    2.168868 
C       2.497178    0.645829    2.628735 
C       2.949747   -1.763565    2.130524 
C      -2.314301   -0.543634   -2.664802 
C      -3.699888   -2.109771   -1.290380 
H      -4.937054   -0.049848   -2.689416 
H      -4.205767    1.297904   -1.815434 
H      -5.259998    0.154214   -0.972913 
H      -2.858938   -0.765100   -3.587567 
H      -1.494289   -1.264473   -2.593345 
H      -1.894129    0.461616   -2.769436 
H      -4.144625   -2.474748   -2.221069 
H      -4.448309   -2.230276   -0.503593 
H      -2.847918   -2.757431   -1.060216 
H      -5.067414   -0.006557    2.579534 
H      -5.196537   -0.740268    0.986177 
H      -4.846337    0.994096    1.144805 
H      -2.885866    0.540024    3.611158 
H      -2.724924    1.739828    2.324492 
H      -1.410424    0.596734    2.645897 
H      -3.428963   -1.832988    3.132548 
H      -1.860889   -1.924467    2.320910 
H      -3.323250   -2.485069    1.498738 
H       5.076534   -0.033576    2.572717 
H       4.833775    0.999267    1.164470 
H       5.205906   -0.725461    0.960895 
H       2.910953    0.471348    3.626148 
H       1.415383    0.500003    2.692077 
H       2.689890    1.687814    2.364698 
H       3.455163   -1.893106    3.092240 
H       3.361175   -2.507020    1.443169 
H       1.889711   -1.986119    2.276056 
H       4.161150   -2.420866   -2.261958 
H       2.875431   -2.740158   -1.099015 
H       4.471422   -2.199329   -0.542638 
H       2.844086   -0.714785   -3.594918 
H       1.867674    0.488554   -2.756860 
H       1.492654   -1.245278   -2.598746 
H       4.926152    0.006132   -2.693204 
H       5.242521    0.212691   -0.975539 
H       4.173424    1.341530   -1.818585 
H       2.161195    4.153753   -0.299637 
H      -2.167540    4.149251   -0.330766 
H      -0.003956    5.412427   -0.382668 
C      -0.002486   -2.650097   -0.035356 
H       0.896687   -3.103825    0.391369 
H      -0.862309   -3.101407    0.468568 
H      -0.049111   -2.960206   -1.091630 
H      -0.000119   -0.594920    1.513826 

71
REACTION A. REACTANT, PBE0-D3, 
G_raw (298.15 K) = -1855.095435 Hartree
N       0.002641    1.577816   -0.131023 
C      -1.159659    2.253795   -0.186542 
C      -1.204791    3.635701   -0.255298 
C       0.001976    4.320831   -0.267780 
C       1.209050    3.638506   -0.214166 
C       1.164617    2.256345   -0.147410 
O      -2.296963    1.548394   -0.180986 
P      -2.257348   -0.148882    0.012156 
C      -3.265277   -0.646086   -1.473176 
C      -4.481615    0.247792   -1.718172 
O       2.302059    1.553349   -0.104288 
P       2.259094   -0.150223    0.021284 
C       3.136502   -0.399675    1.646285 
C       4.632024   -0.096321    1.590031 
Ir      0.002291   -0.524548   -0.040748 
C       3.250027   -0.584567   -1.495291 
C       3.622462   -2.066704   -1.413289 
C       2.290364   -0.356365   -2.673122 
C       4.488197    0.290113   -1.695670 
C      -3.124700   -0.327301    1.652413 
C      -4.617255   -0.009153    1.593743 
C      -2.443281    0.655641    2.613307 
C      -2.893555   -1.761278    2.140214 
C       2.470767    0.548505    2.651474 
C       2.892459   -1.850081    2.076134 
C      -2.305856   -0.518967   -2.665817 
C      -3.673824   -2.111568   -1.304067 
H      -4.938432   -0.052805   -2.666835 
H      -4.195974    1.298545   -1.799426 
H      -5.240819    0.152138   -0.943324 
H      -2.859831   -0.731206   -3.585735 
H      -1.484405   -1.238744   -2.605514 
H      -1.893209    0.490396   -2.755712 
H      -4.114699   -2.462014   -2.242595 
H      -4.421643   -2.243912   -0.519291 
H      -2.814140   -2.751468   -1.082711 
H      -5.016184   -0.036260    2.612969 
H      -5.174553   -0.741379    1.006515 
H      -4.804126    0.988972    1.190408 
H      -2.842871    0.484872    3.617596 
H      -2.646988    1.693486    2.340595 
H      -1.360505    0.512645    2.656945 
H      -3.359894   -1.871992    3.124280 
H      -1.828600   -1.982465    2.239880 
H      -3.339112   -2.507483    1.478324 
H       5.036534   -0.166439    2.604944 
H       4.828854    0.913735    1.222894 
H       5.176628   -0.813231    0.972661 
H       2.885899    0.342463    3.642784 
H       1.389253    0.400667    2.707007 
H       2.668381    1.595519    2.411859 
H       3.371862   -2.009522    3.047186 
H       3.317269   -2.572949    1.375548 
H       1.825776   -2.059663    2.182131 
H       4.060662   -2.371479   -2.368859 
H       2.747695   -2.698630   -1.232631 
H       4.363417   -2.261942   -0.634474 
H       2.825658   -0.563699   -3.605133 
H       1.938259    0.678432   -2.718853 
H       1.425919   -1.025415   -2.638396 
H       4.921938    0.047244   -2.671421 
H       5.255761    0.115513   -0.943447 
H       4.232370    1.351678   -1.696126 
H       2.165516    4.142236   -0.223222 
H      -2.161490    4.137387   -0.296205 
H       0.001711    5.403543   -0.320379 
C      -0.013268   -2.610002   -0.120262 
H       0.887790   -3.088464    0.273947 
H      -0.868563   -3.074195    0.379756 
H      -0.080598   -2.885230   -1.186219 
H       0.005473   -0.575722    1.482395 

71
REACTION A. REACTANT, PBE-D3, 
G_raw (298.15 K) = -1854.952245 Hartree
N       0.003173    1.587670   -0.125813 
C      -1.169678    2.275760   -0.179807 
C      -1.211049    3.668363   -0.250120 
C       0.003101    4.358990   -0.265627 
C       1.217235    3.670453   -0.212338 
C       1.175980    2.277667   -0.143696 
O      -2.322886    1.572248   -0.170199 
P      -2.268273   -0.158806    0.014370 
C      -3.296395   -0.643017   -1.494409 
C      -4.507843    0.273953   -1.734436 
O       2.328846    1.575916   -0.098892 
P       2.270315   -0.160776    0.022542 
C       3.156076   -0.408325    1.673132 
C       4.654744   -0.074717    1.618299 
Ir      0.002457   -0.530612   -0.046619 
C       3.283879   -0.586009   -1.513961 
C       3.681503   -2.071279   -1.429467 
C       2.310411   -0.369786   -2.694382 
C       4.516802    0.312760   -1.709339 
C      -3.147297   -0.339320    1.677957 
C      -4.641733    0.012978    1.616579 
C      -2.439121    0.624672    2.653039 
C      -2.942107   -1.792617    2.148839 
C       2.463210    0.527435    2.685552 
C       2.932663   -1.875397    2.090954 
C      -2.322088   -0.520801   -2.687230 
C      -3.727765   -2.112346   -1.328742 
H      -4.970734   -0.015560   -2.692332 
H      -4.208582    1.328752   -1.807477 
H      -5.273965    0.180513   -0.955509 
H      -2.872327   -0.742485   -3.616211 
H      -1.494037   -1.242457   -2.614668 
H      -1.908441    0.495082   -2.782486 
H      -4.182814   -2.452998   -2.272947 
H      -4.478311   -2.238303   -0.535523 
H      -2.872893   -2.772745   -1.115156 
H      -5.048739   -0.016941    2.640651 
H      -5.216551   -0.705300    1.015503 
H      -4.806958    1.025711    1.221267 
H      -2.855634    0.462490    3.660068 
H      -2.606123    1.676651    2.381458 
H      -1.354937    0.443861    2.706164 
H      -3.406718   -1.906415    3.141682 
H      -1.874548   -2.038932    2.241157 
H      -3.410854   -2.526116    1.477194 
H       5.064412   -0.145798    2.639212 
H       4.833366    0.948555    1.257687 
H       5.217289   -0.780204    0.990956 
H       2.888107    0.330679    3.682883 
H       1.378945    0.348512    2.743102 
H       2.631652    1.586727    2.445460 
H       3.405012   -2.034219    3.073945 
H       3.383620   -2.589447    1.386716 
H       1.862032   -2.107976    2.183521 
H       4.142735   -2.366888   -2.385770 
H       2.810427   -2.724143   -1.264832 
H       4.418767   -2.258543   -0.635222 
H       2.843880   -0.586426   -3.634265 
H       1.952434    0.669826   -2.748997 
H       1.443034   -1.045674   -2.646057 
H       4.960018    0.076589   -2.691027 
H       5.289749    0.145570   -0.949972 
H       4.245577    1.377659   -1.707937 
H       2.180192    4.177731   -0.222643 
H      -2.174055    4.174085   -0.289676 
H       0.003089    5.448819   -0.319834 
C      -0.016377   -2.631838   -0.150682 
H       0.903166   -3.114567    0.212454 
H      -0.862758   -3.102001    0.372943 
H      -0.118110   -2.888544   -1.225429 
H       0.005924   -0.608763    1.488650 

71
REACTION A. REACTANT, B3LYP, 
G_raw (298.15 K) = -1856.626905 Hartree
N       0.000429    1.589623   -0.117378 
C      -1.164616    2.268340   -0.161095 
C      -1.209908    3.654245   -0.233150 
C      -0.000181    4.340718   -0.258991 
C       1.209812    3.655826   -0.213374 
C       1.165095    2.269804   -0.142417 
O      -2.310400    1.559425   -0.137589 
P      -2.298859   -0.154175    0.020115 
C      -3.316846   -0.607606   -1.510101 
C      -4.501780    0.341745   -1.765764 
O       2.311072    1.562301   -0.100694 
P       2.299390   -0.153845    0.023990 
C       3.226986   -0.383173    1.659101 
C       4.714010    0.002623    1.580773 
Ir      0.001023   -0.548657   -0.032007 
C       3.309802   -0.577584   -1.520170 
C       3.792017   -2.037909   -1.424613 
C       2.320649   -0.446184   -2.698554 
C       4.495950    0.374058   -1.761387 
C      -3.219943   -0.350288    1.663392 
C      -4.708566    0.029262    1.582725 
C      -2.530603    0.578532    2.685046 
C      -3.062727   -1.814102    2.121704 
C       2.538167    0.519418    2.704193 
C       3.075231   -1.857346    2.084978 
C      -2.333318   -0.503740   -2.695866 
C      -3.802017   -2.064559   -1.381365 
H      -4.956392    0.066521   -2.722504 
H      -4.178411    1.380983   -1.834881 
H      -5.274570    0.269611   -1.002933 
H      -2.873967   -0.727594   -3.620191 
H      -1.515799   -1.223546   -2.611986 
H      -1.915749    0.500849   -2.797871 
H      -4.254006   -2.364787   -2.331318 
H      -4.561216   -2.182102   -0.606837 
H      -2.982201   -2.756911   -1.175432 
H      -5.129457   -0.015224    2.591876 
H      -5.282877   -0.659676    0.962654 
H      -4.851510    1.045305    1.210630 
H      -2.985688    0.405830    3.664392 
H      -2.667431    1.631340    2.433570 
H      -1.462404    0.376058    2.775763 
H      -3.557479   -1.928837    3.090497 
H      -2.013154   -2.085071    2.244979 
H      -3.523339   -2.523358    1.431964 
H       5.139541   -0.062793    2.586815 
H       4.852348    1.027018    1.230504 
H       5.287457   -0.670857    0.943160 
H       3.006556    0.335556    3.675229 
H       1.473910    0.300732    2.803294 
H       2.658227    1.578146    2.469570 
H       3.565796   -1.990452    3.053544 
H       3.543033   -2.549093    1.382544 
H       2.026410   -2.136012    2.196741 
H       4.243188   -2.317873   -2.381104 
H       2.970411   -2.732605   -1.234123 
H       4.551174   -2.174289   -0.653047 
H       2.854862   -0.656448   -3.629782 
H       1.907989    0.562264   -2.780142 
H       1.499838   -1.163047   -2.622834 
H       4.944146    0.119342   -2.726840 
H       5.273212    0.282627   -1.005131 
H       4.175372    1.415541   -1.805165 
H       2.163997    4.161806   -0.230690 
H      -2.164334    4.159009   -0.265818 
H      -0.000405    5.422314   -0.314420 
C      -0.005920   -2.654739   -0.120776 
H       0.902500   -3.122909    0.264928 
H      -0.851530   -3.120659    0.390858 
H      -0.083166   -2.927986   -1.184420 
H       0.002240   -0.607004    1.499108 

71
REACTION A. REACTANT, M06L, 
G_raw (298.15 K) =    -1856.448710 Hartree
N      -0.001561    1.584072   -0.165235 
C      -1.166220    2.262544   -0.215524 
C      -1.211153    3.646019   -0.293409 
C      -0.003170    4.330163   -0.322233 
C       1.205653    3.648459   -0.275860 
C       1.162350    2.264842   -0.198273 
O      -2.305656    1.554155   -0.195350 
P      -2.267620   -0.149674    0.014575 
C      -3.279410   -0.648856   -1.475342 
C      -4.488165    0.249221   -1.737497 
O       2.302711    1.558870   -0.160879 
P       2.266443   -0.148418    0.019180 
C       3.167657   -0.327004    1.645877 
C       4.657190   -0.001827    1.560155 
Ir      0.000005   -0.554008   -0.024799 
C       3.275186   -0.619502   -1.483990 
C       3.719365   -2.075059   -1.325428 
C       2.302137   -0.510936   -2.666913 
C       4.471191    0.296810   -1.741281 
C      -3.160467   -0.298150    1.649080 
C      -4.654202    0.006591    1.563942 
C      -2.502435    0.705225    2.604143 
C      -2.931315   -1.721936    2.166116 
C       2.502861    0.642575    2.630106 
C       2.956710   -1.765725    2.128092 
C      -2.314492   -0.543493   -2.665301 
C      -3.703084   -2.107826   -1.292044 
H      -4.935651   -0.046573   -2.691747 
H      -4.204362    1.300336   -1.816458 
H      -5.260517    0.157126   -0.975644 
H      -2.858923   -0.766211   -3.587944 
H      -1.494244   -1.263957   -2.592834 
H      -1.894658    0.461784   -2.771051 
H      -4.148191   -2.471237   -2.223205 
H      -4.452146   -2.227412   -0.505766 
H      -2.852603   -2.757435   -1.061964 
H      -5.072515   -0.006543    2.575555 
H      -5.200495   -0.737885    0.981126 
H      -4.848327    0.995797    1.142504 
H      -2.893672    0.535671    3.611495 
H      -2.728088    1.737092    2.326962 
H      -1.415749    0.591916    2.649890 
H      -3.437915   -1.834874    3.129275 
H      -1.869416   -1.929778    2.318995 
H      -3.332596   -2.485625    1.494981 
H       5.081840   -0.034536    2.568636 
H       4.836441    0.999747    1.161925 
H       5.209634   -0.724430    0.955949 
H       2.919542    0.467371    3.626213 
H       1.421426    0.495448    2.696141 
H       2.693836    1.685073    2.366801 
H       3.463471   -1.895037    3.089161 
H       3.368775   -2.507963    1.439850 
H       1.897269   -1.990319    2.274814 
H       4.163970   -2.417196   -2.264920 
H       2.879227   -2.740057   -1.101882 
H       4.474511   -2.197239   -0.545540 
H       2.844137   -0.714493   -3.595457 
H       1.868380    0.489788   -2.757957 
H       1.492526   -1.243780   -2.598776 
H       4.925042    0.009279   -2.695126 
H       5.243100    0.214901   -0.977735 
H       4.172587    1.343810   -1.818937 
H       2.161198    4.154026   -0.297719 
H      -2.167310    4.149616   -0.329051 
H      -0.003808    5.412607   -0.380921 
C      -0.002613   -2.650355   -0.036061 
H       0.896376   -3.104730    0.390529 
H      -0.862778   -3.102118    0.466993 
H      -0.048873   -2.959621   -1.092632 
H      -0.000140   -0.595700    1.514973 

71
REACTION A. REACTANT, M11L, 
G_raw (298.15 K) =    -1856.467078 Hartree
N       0.001138    1.538573   -0.135069 
C      -1.144990    2.212640   -0.187017 
C      -1.198545    3.585404   -0.262899 
C       0.000171    4.265666   -0.288209 
C       1.199455    3.587462   -0.243227 
C       1.146911    2.214574   -0.167989 
O      -2.266385    1.516268   -0.172798 
P      -2.255042   -0.142877    0.018073 
C      -3.208237   -0.617954   -1.495724 
C      -4.416040    0.254540   -1.775074 
O       2.268941    1.520078   -0.134313 
P       2.256215   -0.142356    0.022664 
C       3.193589   -0.328654    1.606203 
C       4.677485   -0.050257    1.491690 
Ir      0.000715   -0.561548    0.010242 
C       3.197287   -0.585130   -1.508242 
C       3.557476   -2.056490   -1.439372 
C       2.209747   -0.359729   -2.645868 
C       4.421797    0.270974   -1.765203 
C      -3.182009   -0.291202    1.612205 
C      -4.664815   -0.004637    1.504205 
C      -2.560161    0.717369    2.564546 
C      -2.951900   -1.695931    2.141940 
C       2.585950    0.660930    2.586369 
C       2.957706   -1.743278    2.105856 
C      -2.221846   -0.455017   -2.645417 
C      -3.600364   -2.078380   -1.375662 
H      -4.811950   -0.013356   -2.765996 
H      -4.159414    1.321044   -1.804671 
H      -5.229335    0.113222   -1.057289 
H      -2.740681   -0.656833   -3.594037 
H      -1.381157   -1.164403   -2.588268 
H      -1.818284    0.566667   -2.713258 
H      -3.987102   -2.429525   -2.343804 
H      -4.391726   -2.245009   -0.632230 
H      -2.743328   -2.719176   -1.117187 
H      -5.093200    0.000890    2.517701 
H      -5.205525   -0.770747    0.934420 
H      -4.871673    0.978049    1.059463 
H      -2.956041    0.534925    3.574124 
H      -2.809576    1.750950    2.291239 
H      -1.466393    0.632433    2.626503 
H      -3.502344   -1.817457    3.085945 
H      -1.889900   -1.886944    2.347102 
H      -3.307646   -2.478177    1.456964 
H       5.113591   -0.063262    2.501773 
H       4.888651    0.937324    1.060029 
H       5.208244   -0.811758    0.906657 
H       3.004408    0.464662    3.584237 
H       1.494629    0.565760    2.669911 
H       2.822531    1.700524    2.324785 
H       3.513650   -1.889823    3.043104 
H       3.302939   -2.512528    1.400922 
H       1.895708   -1.930649    2.313894 
H       3.938158   -2.382161   -2.418579 
H       2.686581   -2.687070   -1.203047 
H       4.344315   -2.265421   -0.702040 
H       2.707454   -0.576665   -3.602261 
H       1.856830    0.681532   -2.696559 
H       1.333662   -1.023881   -2.587164 
H       4.792068    0.048247   -2.777081 
H       5.244523    0.069704   -1.073113 
H       4.191622    1.343374   -1.731858 
H       2.161450    4.089604   -0.263124 
H      -2.160915    4.086097   -0.297959 
H      -0.000253    5.354101   -0.344803 
C      -0.006671   -2.626940    0.034360 
H       0.881764   -3.097171    0.485604 
H      -0.880286   -3.086910    0.524040 
H      -0.031510   -2.979911   -1.018965 
H       0.002447   -0.549076    1.542727 

71
REACTION A. REACTANT, PBE0, 
G_raw (298.15 K) =    -1855.024827 Hartree
N       0.002609    1.576007   -0.117527 
C      -1.159025    2.252294   -0.171296 
C      -1.204579    3.634817   -0.238722 
C       0.001845    4.319816   -0.250325 
C       1.208612    3.637681   -0.196306 
C       1.163816    2.254917   -0.131282 
O      -2.297015    1.547606   -0.164909 
P      -2.267213   -0.151767    0.014566 
C      -3.278500   -0.631172   -1.482756 
C      -4.481677    0.280770   -1.730117 
O       2.301930    1.552605   -0.086563 
P       2.269077   -0.152554    0.023561 
C       3.168615   -0.409659    1.642971 
C       4.660213   -0.084495    1.577867 
Ir      0.002673   -0.528794   -0.039266 
C       3.263396   -0.568018   -1.504370 
C       3.666331   -2.043584   -1.437634 
C       2.298302   -0.353609   -2.679422 
C       4.486729    0.327786   -1.707872 
C      -3.157072   -0.336671    1.649575 
C      -4.646526   -0.001280    1.580591 
C      -2.480538    0.628632    2.631134 
C      -2.951584   -1.776910    2.131086 
C       2.504605    0.515705    2.669984 
C       2.952757   -1.867423    2.063424 
C      -2.315772   -0.512919   -2.672765 
C      -3.714510   -2.091236   -1.330301 
H      -4.938357   -0.012999   -2.681162 
H      -4.182920    1.327816   -1.810392 
H      -5.245496    0.195007   -0.958401 
H      -2.868321   -0.731367   -3.592352 
H      -1.495282   -1.232723   -2.604829 
H      -1.903183    0.495524   -2.770803 
H      -4.161577   -2.420901   -2.273674 
H      -4.465824   -2.220363   -0.548325 
H      -2.868844   -2.752115   -1.117868 
H      -5.051818   -0.031532    2.597440 
H      -5.209764   -0.722587    0.985496 
H      -4.821479    1.001979    1.184973 
H      -2.895294    0.447860    3.627664 
H      -2.673307    1.671630    2.370742 
H      -1.399956    0.475836    2.687770 
H      -3.431364   -1.886207    3.108982 
H      -1.891371   -2.013800    2.244304 
H      -3.400035   -2.513503    1.460419 
H       5.071680   -0.159756    2.589831 
H       4.842266    0.932202    1.221864 
H       5.212478   -0.786668    0.950424 
H       2.940019    0.303658    3.651473 
H       1.427059    0.348717    2.741984 
H       2.682254    1.568891    2.442357 
H       3.440332   -2.024359    3.030948 
H       3.386841   -2.578702    1.356826 
H       1.890725   -2.096322    2.175673 
H       4.112267   -2.327181   -2.396366 
H       2.805661   -2.697173   -1.267819 
H       4.410486   -2.234216   -0.660808 
H       2.832306   -0.563540   -3.611841 
H       1.939314    0.678258   -2.733061 
H       1.439461   -1.029035   -2.635906 
H       4.921035    0.090541   -2.684933 
H       5.259789    0.167256   -0.957786 
H       4.215140    1.385313   -1.709965 
H       2.164274    4.143122   -0.204223 
H      -2.160525    4.138120   -0.279566 
H       0.001554    5.402621   -0.302251 
C      -0.012907   -2.614540   -0.125845 
H       0.895642   -3.093731    0.249548 
H      -0.857656   -3.080804    0.389820 
H      -0.101034   -2.888961   -1.190312 
H       0.006277   -0.593003    1.484449 

71
REACTION A. REACTANT, PBE, 
G_raw (298.15 K) =    -1854.886097 Hartree
N       0.000969    1.587701   -0.124742 
C      -1.171707    2.275902   -0.170942 
C      -1.213483    3.668961   -0.243702 
C       0.000530    4.359007   -0.269227 
C       1.214723    3.670476   -0.222750 
C       1.173370    2.277295   -0.151030 
O      -2.325590    1.573099   -0.150858 
P      -2.277973   -0.160667    0.017811 
C      -3.310919   -0.627767   -1.501769 
C      -4.511194    0.304844   -1.741293 
O       2.327307    1.575838   -0.111326 
P       2.278682   -0.160967    0.022173 
C       3.176892   -0.391959    1.676247 
C       4.669705   -0.029974    1.616264 
Ir      0.001129   -0.532291   -0.046481 
C       3.307718   -0.595380   -1.510395 
C       3.756710   -2.064801   -1.398829 
C       2.330912   -0.443986   -2.697234 
C       4.512215    0.337394   -1.727862 
C      -3.173987   -0.354749    1.678026 
C      -4.666069    0.010062    1.612107 
C      -2.469621    0.589133    2.674750 
C      -2.987247   -1.815341    2.134595 
C       2.475380    0.530106    2.694887 
C       2.985646   -1.861932    2.100153 
C      -2.334602   -0.512005   -2.692945 
C      -3.765815   -2.092244   -1.352328 
H      -4.975928    0.020903   -2.700179 
H      -4.200681    1.356277   -1.814793 
H      -5.279941    0.220300   -0.963608 
H      -2.884533   -0.736995   -3.621551 
H      -1.507666   -1.234511   -2.615669 
H      -1.920294    0.502966   -2.793629 
H      -4.227506   -2.412488   -2.300697 
H      -4.518139   -2.217083   -0.560573 
H      -2.922840   -2.770963   -1.149764 
H      -5.077487   -0.030893    2.634255 
H      -5.244793   -0.695284    0.999507 
H      -4.823426    1.029571    1.231398 
H      -2.899264    0.414395    3.674337 
H      -2.626755    1.646523    2.418807 
H      -1.387653    0.398665    2.737950 
H      -3.460290   -1.934125    3.123031 
H      -1.923023   -2.073349    2.233416 
H      -3.459122   -2.537439    1.452730 
H       5.082872   -0.095610    2.636377 
H       4.829387    0.997537    1.258873 
H       5.245237   -0.722729    0.986520 
H       2.915017    0.341498    3.687607 
H       1.395711    0.329061    2.764248 
H       2.621654    1.592897    2.455552 
H       3.457458   -2.004126    3.086100 
H       3.456125   -2.569910    1.402708 
H       1.920347   -2.118211    2.191649 
H       4.225700   -2.359753   -2.351794 
H       2.909449   -2.745526   -1.223262 
H       4.501723   -2.214870   -0.604349 
H       2.877451   -0.654866   -3.631138 
H       1.927304    0.577182   -2.775590 
H       1.496323   -1.159049   -2.634951 
H       4.972074    0.078234   -2.696143 
H       5.283562    0.226795   -0.956036 
H       4.207346    1.392163   -1.770759 
H       2.176899    4.179240   -0.240337 
H      -2.175839    4.176553   -0.277612 
H       0.000373    5.448782   -0.325673 
C      -0.009296   -2.633948   -0.150952 
H       0.906194   -3.113235    0.226854 
H      -0.861514   -3.108304    0.359023 
H      -0.092057   -2.891682   -1.226931 
H       0.003302   -0.617555    1.489372 


71
REACTION A. TS, B3LYP-D2, 
G_raw (298.15 K) =  -1856.781663 Hartree
C       1.171210    2.277141   -0.143870 
N       0.000002    1.584596   -0.128543 
C      -1.171204    2.277144   -0.143878 
C      -1.209311    3.662480   -0.183254 
C       0.000005    4.349457   -0.204348 
C       1.209320    3.662478   -0.183246 
Ir      0.000000   -0.485271   -0.054854 
C      -0.000008   -2.690560   -0.367353 
O      -2.317494    1.581366   -0.118792 
P      -2.254953   -0.135422    0.009473 
C      -3.069550   -0.413142    1.655576 
C      -2.825149   -1.884185    2.041432 
O       2.317497    1.581360   -0.118776 
P       2.254952   -0.135426    0.009516 
C       3.297473   -0.590469   -1.461007 
C       4.550875    0.281509   -1.629653 
C      -3.297436   -0.590441   -1.461086 
C      -3.676996   -2.074974   -1.337806 
C      -4.550845    0.281525   -1.629739 
C      -2.377984   -0.385625   -2.681611 
C       3.069510   -0.413115    1.655645 
C       2.825107   -1.884151    2.041523 
C       4.566708   -0.088410    1.678238 
C       2.313791    0.488923    2.650879 
C       3.677050   -2.074995   -1.337683 
C       2.378045   -0.385698   -2.681557 
C      -4.566749   -0.088445    1.678139 
C      -2.313858    0.488879    2.650844 
H      -5.023407    0.009771   -2.579557 
H      -4.289741    1.340880   -1.666972 
H      -5.277600    0.124474   -0.834357 
H      -2.938823   -0.646397   -3.584798 
H      -1.488231   -1.015832   -2.622779 
H      -2.059371    0.657314   -2.765915 
H      -4.160931   -2.384941   -2.269219 
H      -4.380453   -2.242537   -0.519438 
H      -2.798903   -2.710218   -1.188726 
H      -4.921420   -0.165501    2.710979 
H      -5.139572   -0.794288    1.073380 
H      -4.762158    0.926432    1.323777 
H      -2.670691    0.258818    3.659600 
H      -2.498849    1.546650    2.450973 
H      -1.236926    0.300798    2.606463 
H      -3.265376   -2.053711    3.029085 
H      -1.755334   -2.096780    2.100593 
H      -3.287960   -2.582520    1.341402 
H       4.921354   -0.165448    2.711087 
H       4.762120    0.926462    1.323863 
H       5.139548   -0.794261    1.073504 
H       2.670603    0.258881    3.659647 
H       1.236861    0.300839    2.606478 
H       2.498785    1.546690    2.450994 
H       3.265306   -2.053654    3.029193 
H       3.287944   -2.582496    1.341521 
H       1.755291   -2.096753    2.100657 
H       4.161009   -2.384977   -2.269078 
H       2.798963   -2.710247   -1.188606 
H       4.380492   -2.242528   -0.519296 
H       2.938912   -0.646469   -3.584728 
H       2.059403    0.657230   -2.765885 
H       1.488309   -1.015930   -2.622734 
H       5.023466    0.009732   -2.579450 
H       5.277611    0.124493   -0.834247 
H       4.289757    1.340859   -1.666925 
H       2.165070    4.165581   -0.192529 
H      -2.165059    4.165586   -0.192544 
H       0.000007    5.432055   -0.233285 
H       0.889244   -3.250809   -0.076882 
H      -0.889268   -3.250799   -0.076884 
H      -0.000006   -2.569556   -1.455308 
H      -0.000005   -1.834229    0.799117 

71
REACTION A. TS, PBE-D2, 
G_raw (298.15 K) =  -1854.996711 Hartree
C       1.178046    2.277131   -0.118548 
N       0.000000    1.573264   -0.110197 
C      -1.178046    2.277131   -0.118547 
C      -1.212435    3.670162   -0.143593 
C       0.000000    4.362060   -0.157701 
C       1.212436    3.670162   -0.143594 
Ir      0.000000   -0.475572   -0.060864 
C       0.000000   -2.686484   -0.350372 
O      -2.334131    1.589755   -0.099601 
P      -2.248526   -0.146344    0.009529 
C      -3.071351   -0.440263    1.660351 
C      -2.821645   -1.915471    2.029812 
O       2.334131    1.589755   -0.099602 
P       2.248526   -0.146344    0.009529 
C       3.291639   -0.579208   -1.481219 
C       4.553406    0.284754   -1.629573 
C      -3.291638   -0.579208   -1.481219 
C      -3.650846   -2.071629   -1.384661 
C      -4.553406    0.284754   -1.629573 
C      -2.366304   -0.331775   -2.690183 
C       3.071351   -0.440263    1.660351 
C       2.821645   -1.915471    2.029813 
C       4.569205   -0.115160    1.679490 
C       2.309782    0.457059    2.656246 
C       3.650847   -2.071629   -1.384660 
C       2.366304   -0.331776   -2.690183 
C      -4.569205   -0.115160    1.679490 
C      -2.309782    0.457058    2.656246 
H      -5.018392    0.039138   -2.599557 
H      -4.303932    1.355748   -1.629978 
H      -5.292112    0.090294   -0.842197 
H      -2.915215   -0.598011   -3.609093 
H      -1.450468   -0.940136   -2.633071 
H      -2.075995    0.728816   -2.758921 
H      -4.135370   -2.374038   -2.327899 
H      -4.357390   -2.266019   -0.563412 
H      -2.758306   -2.703822   -1.248358 
H      -4.928909   -0.198856    2.718725 
H      -5.147137   -0.822833    1.066571 
H      -4.766163    0.909619    1.330011 
H      -2.650682    0.208669    3.675076 
H      -2.507725    1.523639    2.472431 
H      -1.223079    0.277185    2.590292 
H      -3.272850   -2.100660    3.018803 
H      -1.742923   -2.124124    2.099843 
H      -3.276972   -2.615649    1.313810 
H       4.928909   -0.198856    2.718725 
H       4.766162    0.909619    1.330011 
H       5.147137   -0.822833    1.066572 
H       2.650682    0.208670    3.675076 
H       1.223079    0.277186    2.590291 
H       2.507725    1.523640    2.472430 
H       3.272850   -2.100659    3.018804 
H       3.276972   -2.615648    1.313811 
H       1.742923   -2.124123    2.099843 
H       4.135370   -2.374039   -2.327898 
H       2.758307   -2.703822   -1.248357 
H       4.357390   -2.266019   -0.563411 
H       2.915215   -0.598012   -3.609093 
H       2.075995    0.728815   -2.758921 
H       1.450469   -0.940137   -2.633071 
H       5.018392    0.039137   -2.599557 
H       5.292112    0.090294   -0.842197 
H       4.303931    1.355747   -1.629978 
H       2.176774    4.175075   -0.146877 
H      -2.176774    4.175076   -0.146877 
H       0.000000    5.453119   -0.175119 
H       0.897108   -3.255554   -0.071608 
H      -0.897107   -3.255554   -0.071608 
H       0.000000   -2.535149   -1.443934 
H       0.000000   -1.855147    0.786503 

71
REACTION A. TS, PBE-D3BJ, 
G_raw (298.15 K) =  -1854.986080 Hartree
C       1.176461    2.258183   -0.098327 
N       0.000000    1.554762   -0.092326 
C      -1.176461    2.258183   -0.098327 
C      -1.211238    3.650922   -0.125878 
C       0.000000    4.343234   -0.142229 
C       1.211238    3.650922   -0.125878 
Ir      0.000000   -0.494284   -0.055336 
C       0.000000   -2.692509   -0.373212 
O      -2.331315    1.571361   -0.071074 
P      -2.262737   -0.165530    0.017497 
C      -3.121008   -0.446413    1.669353 
C      -2.958368   -1.935448    2.029024 
O       2.331315    1.571361   -0.071074 
P       2.262737   -0.165530    0.017497 
C       3.306062   -0.548287   -1.505715 
C       4.552058    0.341720   -1.638278 
C      -3.306062   -0.548286   -1.505715 
C      -3.694547   -2.036096   -1.469862 
C      -4.552058    0.341720   -1.638278 
C      -2.366087   -0.275643   -2.698216 
C       3.121008   -0.446413    1.669353 
C       2.958368   -1.935448    2.029024 
C       4.599803   -0.039957    1.676487 
C       2.331777    0.405398    2.683779 
C       3.694547   -2.036096   -1.469861 
C       2.366087   -0.275643   -2.698216 
C      -4.599803   -0.039957    1.676487 
C      -2.331777    0.405398    2.683779 
H      -5.002764    0.151854   -2.626347 
H      -4.294141    1.408102   -1.583431 
H      -5.312711    0.122340   -0.880106 
H      -2.900741   -0.519095   -3.630558 
H      -1.453178   -0.886718   -2.648530 
H      -2.070885    0.783549   -2.746172 
H      -4.179011   -2.294984   -2.425050 
H      -4.410908   -2.255634   -0.665140 
H      -2.819684   -2.694036   -1.356026 
H      -4.972317   -0.100095    2.712014 
H      -5.217249   -0.713062    1.065614 
H      -4.742657    0.992903    1.328242 
H      -2.690015    0.162073    3.696821 
H      -2.481402    1.481439    2.516411 
H      -1.253772    0.185724    2.631000 
H      -3.420637   -2.105565    3.014583 
H      -1.897486   -2.216162    2.102550 
H      -3.451919   -2.604823    1.310540 
H       4.972317   -0.100095    2.712014 
H       4.742657    0.992903    1.328242 
H       5.217249   -0.713062    1.065614 
H       2.690015    0.162073    3.696821 
H       1.253772    0.185724    2.631000 
H       2.481402    1.481439    2.516411 
H       3.420637   -2.105565    3.014583 
H       3.451919   -2.604823    1.310540 
H       1.897486   -2.216162    2.102550 
H       4.179011   -2.294984   -2.425050 
H       2.819684   -2.694036   -1.356026 
H       4.410908   -2.255634   -0.665140 
H       2.900741   -0.519095   -3.630558 
H       2.070885    0.783548   -2.746172 
H       1.453178   -0.886718   -2.648530 
H       5.002764    0.151854   -2.626347 
H       5.312711    0.122340   -0.880106 
H       4.294141    1.408102   -1.583431 
H       2.175547    4.155116   -0.128643 
H      -2.175547    4.155116   -0.128643 
H       0.000000    5.433887   -0.162159 
H       0.893244   -3.266500   -0.098734 
H      -0.893244   -3.266500   -0.098734 
H       0.000000   -2.533495   -1.464379 
H       0.000000   -1.869492    0.792078 

71
REACTION A. TS, B3LYP-D3, 
G_raw (298.15 K) =  -1856.719347 Hartree
C       1.169269    2.253618   -0.118045 
N       0.000002    1.560143   -0.103765 
C      -1.169263    2.253617   -0.118196 
C      -1.207842    3.639009   -0.160873 
C       0.000006    4.327129   -0.184294 
C       1.207852    3.639011   -0.160716 
Ir      0.000001   -0.511070   -0.039838 
C       0.000020   -2.710482   -0.370467 
O      -2.316534    1.561165   -0.085998 
P      -2.276609   -0.156199    0.018005 
C      -3.143440   -0.418011    1.666216 
C      -2.997459   -1.905306    2.045294 
O       2.316539    1.561170   -0.085701 
P       2.276608   -0.156210    0.018037 
C       3.316884   -0.552304   -1.501690 
C       4.548263    0.357701   -1.660314 
C      -3.316989   -0.552532   -1.501586 
C      -3.738242   -2.031918   -1.447206 
C      -4.548274    0.357579   -1.660355 
C      -2.374149   -0.322538   -2.703193 
C       3.143532   -0.418262    1.666159 
C       2.997753   -1.905645    2.044971 
C       4.621784   -0.003668    1.662916 
C       2.368209    0.439697    2.689019 
C       3.737965   -2.031751   -1.447668 
C       2.374020   -0.321922   -2.703205 
C      -4.621738   -0.003589    1.662963 
C      -2.368173    0.440241    2.688873 
H      -5.002245    0.148608   -2.633995 
H      -4.272869    1.412634   -1.637343 
H      -5.307204    0.178406   -0.901750 
H      -2.920592   -0.541645   -3.625037 
H      -1.496304   -0.969124   -2.662677 
H      -2.034746    0.714986   -2.755582 
H      -4.214504   -2.294282   -2.396253 
H      -4.462250   -2.223538   -0.653431 
H      -2.884988   -2.701051   -1.313253 
H      -5.002510   -0.062062    2.686968 
H      -5.232908   -0.666891    1.049958 
H      -4.754517    1.022842    1.315980 
H      -2.766854    0.235284    3.686456 
H      -2.484743    1.507402    2.491649 
H      -1.303200    0.198380    2.689183 
H      -3.462287   -2.060518    3.023105 
H      -1.948425   -2.196730    2.124092 
H      -3.490856   -2.572672    1.337012 
H       5.002592   -0.062224    2.686902 
H       4.754441    1.022818    1.316050 
H       5.233010   -0.666830    1.049814 
H       2.767048    0.234687    3.686528 
H       1.303289    0.197608    2.689420 
H       2.484531    1.506909    2.491927 
H       3.462593   -2.060959    3.022759 
H       3.491256   -2.572813    1.336579 
H       1.948763   -2.197246    2.123710 
H       4.214146   -2.293962   -2.396798 
H       2.884638   -2.700811   -1.313815 
H       4.461995   -2.223629   -0.653974 
H       2.920371   -0.540984   -3.625114 
H       2.034829    0.715682   -2.755406 
H       1.496043   -0.968335   -2.662755 
H       5.002129    0.148949   -2.634050 
H       5.307232    0.178221   -0.901822 
H       4.272985    1.412783   -1.636984 
H       2.164774    4.139371   -0.170131 
H      -2.164764    4.139368   -0.170406 
H       0.000008    5.409507   -0.216381 
H       0.885658   -3.274148   -0.080422 
H      -0.885584   -3.274188   -0.080394 
H       0.000003   -2.586138   -1.456899 
H      -0.000011   -1.852831    0.821787 

71
REACTION A. TS, M11L, 
G_raw (298.15 K) =  -1856.452348 Hartree
C       1.149025    2.191622   -0.152978 
N       0.000001    1.504208   -0.130168 
C      -1.149024    2.191622   -0.152972 
C      -1.196496    3.564810   -0.208717 
C       0.000001    4.246315   -0.238364 
C       1.196497    3.564810   -0.208724 
Ir      0.000000   -0.541131   -0.038646 
C       0.000000   -2.690658   -0.268333 
O      -2.272069    1.511116   -0.120245 
P      -2.249633   -0.155930    0.018328 
C      -3.109360   -0.350402    1.646842 
C      -2.981931   -1.801163    2.074451 
O       2.272070    1.511115   -0.120256 
P       2.249633   -0.155930    0.018327 
C       3.289844   -0.550698   -1.467148 
C       4.482543    0.368517   -1.649520 
C      -3.289842   -0.550690   -1.467151 
C      -3.734719   -1.997754   -1.394934 
C      -4.482540    0.368530   -1.649520 
C      -2.350430   -0.363439   -2.649768 
C       3.109358   -0.350393    1.646843 
C       2.981924   -1.801151    2.074461 
C       4.560417    0.074802    1.634962 
C       2.333118    0.522288    2.620053 
C       3.734718   -1.997764   -1.394924 
C       2.350433   -0.363451   -2.649766 
C      -4.560418    0.074796    1.634959 
C      -2.333122    0.522272    2.620059 
H      -4.931236    0.155894   -2.631739 
H      -4.196632    1.427516   -1.644432 
H      -5.267575    0.217961   -0.901847 
H      -2.903061   -0.551821   -3.582019 
H      -1.496855   -1.054281   -2.617464 
H      -1.957477    0.662818   -2.707751 
H      -4.191446   -2.282874   -2.353926 
H      -4.490421   -2.167137   -0.615677 
H      -2.896643   -2.689039   -1.220566 
H      -4.937521    0.077019    2.668706 
H      -5.194344   -0.616013    1.065503 
H      -4.695197    1.089449    1.236498 
H      -2.701887    0.332174    3.638524 
H      -2.465597    1.593129    2.416006 
H      -1.256726    0.296194    2.605622 
H      -3.463127   -1.928191    3.055498 
H      -1.931199   -2.101571    2.185452 
H      -3.468973   -2.502036    1.383321 
H       4.937517    0.077030    2.668711 
H       4.695198    1.089452    1.236496 
H       5.194343   -0.616012    1.065513 
H       2.701868    0.332183    3.638522 
H       1.256719    0.296225    2.605601 
H       2.465610    1.593144    2.416004 
H       3.463122   -1.928176    3.055507 
H       3.468961   -2.502030    1.383333 
H       1.931191   -2.101554    2.185466 
H       4.191444   -2.282889   -2.353915 
H       2.896640   -2.689046   -1.220553 
H       4.490419   -2.167144   -0.615666 
H       2.903066   -0.551829   -3.582017 
H       1.957475    0.662805   -2.707749 
H       1.496861   -1.054297   -2.617465 
H       4.931244    0.155872   -2.631735 
H       5.267575    0.217954   -0.901842 
H       4.196637    1.427504   -1.644442 
H       2.160460    4.062830   -0.222560 
H      -2.160459    4.062830   -0.222549 
H       0.000001    5.335283   -0.280949 
H       0.885095   -3.261956    0.042850 
H      -0.885102   -3.261951    0.042837 
H       0.000009   -2.653611   -1.372885 
H       0.000000   -1.801098    0.915990 

71
REACTION A. TS, PBE0-D3, 
G_raw (298.15 K) =  -1855.080812 Hartree
C       1.164594    2.237802   -0.106022 
N       0.000000    1.546584   -0.100507 
C      -1.164594    2.237802   -0.106022 
C      -1.204591    3.620360   -0.135871 
C       0.000000    4.306473   -0.153617 
C       1.204591    3.620360   -0.135871 
Ir      0.000000   -0.501402   -0.049520 
C       0.000000   -2.667100   -0.368950 
O      -2.304645    1.549642   -0.077518 
P      -2.254970   -0.155828    0.016905 
C      -3.106533   -0.430823    1.650660 
C      -2.943951   -1.909197    2.019774 
O       2.304645    1.549642   -0.077518 
P       2.254970   -0.155828    0.016905 
C       3.287286   -0.543306   -1.488275 
C       4.517067    0.354154   -1.637791 
C      -3.287286   -0.543306   -1.488275 
C      -3.692304   -2.017925   -1.442404 
C      -4.517067    0.354154   -1.637791 
C      -2.350944   -0.297288   -2.679535 
C       3.106533   -0.430823    1.650660 
C       2.943950   -1.909197    2.019774 
C       4.579318   -0.030999    1.658080 
C       2.332207    0.423555    2.662713 
C       3.692305   -2.017925   -1.442404 
C       2.350944   -0.297288   -2.679535 
C      -4.579318   -0.030999    1.658080 
C      -2.332207    0.423554    2.662713 
H      -4.971106    0.146993   -2.612683 
H      -4.247787    1.411769   -1.610879 
H      -5.274294    0.166231   -0.877933 
H      -2.895149   -0.514372   -3.604325 
H      -1.466316   -0.937275   -2.642263 
H      -2.020921    0.744798   -2.724629 
H      -4.161718   -2.281266   -2.395509 
H      -4.419076   -2.219192   -0.651961 
H      -2.832206   -2.679948   -1.307297 
H      -4.950396   -0.092360    2.686324 
H      -5.190522   -0.701371    1.050538 
H      -4.724165    0.995285    1.312223 
H      -2.703051    0.193760    3.666537 
H      -2.475960    1.491910    2.485194 
H      -1.261006    0.203087    2.632201 
H      -3.404502   -2.072804    2.999205 
H      -1.889989   -2.187798    2.095676 
H      -3.432828   -2.580447    1.310462 
H       4.950396   -0.092360    2.686324 
H       4.724165    0.995286    1.312223 
H       5.190522   -0.701371    1.050538 
H       2.703051    0.193761    3.666537 
H       1.261006    0.203087    2.632201 
H       2.475960    1.491910    2.485194 
H       3.404502   -2.072804    2.999205 
H       3.432828   -2.580447    1.310463 
H       1.889988   -2.187798    2.095676 
H       4.161718   -2.281266   -2.395509 
H       2.832206   -2.679949   -1.307297 
H       4.419076   -2.219192   -0.651961 
H       2.895149   -0.514372   -3.604325 
H       2.020921    0.744797   -2.724629 
H       1.466316   -0.937276   -2.642263 
H       4.971106    0.146993   -2.612682 
H       5.274294    0.166232   -0.877933 
H       4.247787    1.411769   -1.610880 
H       2.162955    4.120249   -0.139386 
H      -2.162955    4.120249   -0.139386 
H       0.000000    5.390189   -0.175572 
H       0.884184   -3.237003   -0.080804 
H      -0.884183   -3.237004   -0.080803 
H       0.000000   -2.551905   -1.459139 
H       0.000000   -1.828538    0.822464 

71
REACTION A. TS, PBE-D3, 
G_raw (298.15 K) =  -1854.938172 Hartree
C       1.176115    2.257035   -0.100282 
N       0.000000    1.552573   -0.093161 
C      -1.176115    2.257035   -0.100282 
C      -1.211267    3.650138   -0.130519 
C       0.000000    4.342655   -0.148241 
C       1.211267    3.650138   -0.130520 
Ir      0.000000   -0.498752   -0.055024 
C       0.000000   -2.700254   -0.374421 
O      -2.332327    1.571826   -0.071387 
P      -2.266127   -0.165254    0.018160 
C      -3.127156   -0.442851    1.676324 
C      -2.970944   -1.933488    2.038369 
O       2.332327    1.571826   -0.071387 
P       2.266127   -0.165254    0.018160 
C       3.313553   -0.547048   -1.510588 
C       4.557427    0.348810   -1.644636 
C      -3.313553   -0.547048   -1.510588 
C      -3.709505   -2.034522   -1.477133 
C      -4.557427    0.348810   -1.644636 
C      -2.371650   -0.277896   -2.704506 
C       3.127156   -0.442851    1.676324 
C       2.970944   -1.933488    2.038370 
C       4.606105   -0.030467    1.683367 
C       2.336715    0.409057    2.692185 
C       3.709505   -2.034522   -1.477133 
C       2.371650   -0.277896   -2.704506 
C      -4.606105   -0.030467    1.683367 
C      -2.336715    0.409057    2.692185 
H      -5.010401    0.158202   -2.631830 
H      -4.296470    1.414912   -1.593468 
H      -5.319841    0.135252   -0.886153 
H      -2.908182   -0.516410   -3.637382 
H      -1.462475   -0.895192   -2.658265 
H      -2.069042    0.779530   -2.752590 
H      -4.194647   -2.289869   -2.433263 
H      -4.428371   -2.253618   -0.674151 
H      -2.838458   -2.697972   -1.364164 
H      -4.980198   -0.091464    2.718545 
H      -5.226962   -0.699600    1.071200 
H      -4.745807    1.004024    1.337783 
H      -2.704777    0.175606    3.704368 
H      -2.475663    1.485926    2.518782 
H      -1.259856    0.181136    2.651642 
H      -3.433918   -2.101175    3.024331 
H      -1.911607   -2.220799    2.112685 
H      -3.467587   -2.602574    1.321247 
H       4.980198   -0.091464    2.718545 
H       4.745806    1.004024    1.337783 
H       5.226962   -0.699600    1.071200 
H       2.704777    0.175606    3.704368 
H       1.259856    0.181136    2.651642 
H       2.475663    1.485926    2.518782 
H       3.433917   -2.101175    3.024331 
H       3.467587   -2.602574    1.321247 
H       1.911607   -2.220799    2.112685 
H       4.194646   -2.289869   -2.433263 
H       2.838458   -2.697972   -1.364164 
H       4.428371   -2.253618   -0.674151 
H       2.908182   -0.516410   -3.637382 
H       2.069042    0.779530   -2.752590 
H       1.462475   -0.895192   -2.658265 
H       5.010401    0.158202   -2.631830 
H       5.319841    0.135252   -0.886153 
H       4.296470    1.414912   -1.593468 
H       2.176265    4.153349   -0.134170 
H      -2.176265    4.153349   -0.134170 
H       0.000000    5.433498   -0.170379 
H       0.893131   -3.274418   -0.098068 
H      -0.893130   -3.274418   -0.098068 
H       0.000000   -2.546180   -1.466640 
H       0.000000   -1.872361    0.794227 

71
REACTION A. TS, PBE, 
G_raw (298.15 K) =  -1854.867553 HartreeC       1.175996    2.257450   -0.069337
N       0.000003    1.553215   -0.066376
C      -1.175983    2.257462   -0.069293
C      -1.211138    3.651280   -0.092594
C       0.000015    4.343592   -0.107108
C       1.211161    3.651268   -0.092642
Ir     -0.000003   -0.499355   -0.043844
C      -0.000053   -2.697737   -0.384438
O      -2.333029    1.572769   -0.043503
P      -2.276305   -0.166440    0.019819
C      -3.171194   -0.466362    1.663741
C      -3.043515   -1.965209    2.003452
O       2.333035    1.572747   -0.043578
P       2.276299   -0.166465    0.019808
C       3.313364   -0.522746   -1.530782
C       4.552413    0.380569   -1.666107
C      -3.313357   -0.522653   -1.530794
C      -3.719981   -2.008297   -1.528143
C      -4.552433    0.380631   -1.666069
C      -2.362169   -0.243350   -2.714277
C       3.171191   -0.466286    1.663753
C       3.043635   -1.965125    2.003529
C       4.645890   -0.035746    1.656817
C       2.392205    0.354557    2.712739
C       3.720034   -2.008378   -1.528033
C       2.362189   -0.243548   -2.714301
C      -4.645932   -0.035958    1.656795
C      -2.392305    0.354515    2.712770
H      -4.994484    0.204006   -2.660950
H      -4.289289    1.445380   -1.600073
H      -5.324976    0.160995   -0.919426
H      -2.889639   -0.480103   -3.652897
H      -1.451221   -0.857731   -2.662420
H      -2.064380    0.815511   -2.756913
H      -4.199928   -2.240534   -2.492924
H      -4.447108   -2.239452   -0.736093
H      -2.855147   -2.681284   -1.423307
H      -5.033056   -0.109304    2.686601
H      -5.268520   -0.687417    1.027519
H      -4.770797    1.005786    1.327969
H      -2.786059    0.105614    3.711691
H      -2.513841    1.436584    2.560001
H      -1.318551    0.112015    2.692400
H      -3.521086   -2.139413    2.981413
H      -1.990848   -2.273605    2.087091
H      -3.543409   -2.615310    1.271407
H       5.032984   -0.108950    2.686644
H       4.770671    1.005976    1.327891
H       5.268558   -0.687216    1.027631
H       2.785909    0.105671    3.711683
H       1.318464    0.112006    2.692297
H       2.513699    1.436632    2.559979
H       3.521152   -2.139230    2.981534
H       3.543650   -2.615212    1.271555
H       1.990991   -2.273625    2.087113
H       4.199868   -2.240697   -2.492851
H       2.855240   -2.681391   -1.423019
H       4.447269   -2.239422   -0.736051
H       2.889731   -0.480229   -3.652899
H       2.064269    0.815274   -2.756944
H       1.451319   -0.858047   -2.662499
H       4.994564    0.203779   -2.660915
H       5.324903    0.161117   -0.919356
H       4.289209    1.445316   -1.600336
H       2.175400    4.156149   -0.094417
H      -2.175373    4.156169   -0.094332
H       0.000019    5.434592   -0.124497
H       0.892966   -3.274220   -0.112265
H      -0.893301   -3.273993   -0.112551
H       0.000177   -2.536666   -1.475391
H       0.000031   -1.877831    0.795728

REACTION A. TS, PBE0, 
G_raw (298.15 K) = -1855.010311 Hartree
C       1.164072    2.236158   -0.091596 
N       0.000000    1.544949   -0.086898 
C      -1.164072    2.236158   -0.091596 
C      -1.204343    3.619278   -0.120952 
C       0.000000    4.305160   -0.138684 
C       1.204343    3.619278   -0.120952 
Ir      0.000000   -0.504873   -0.044776 
C       0.000000   -2.668016   -0.380897 
O      -2.304768    1.548534   -0.062777 
P      -2.264866   -0.158280    0.019062 
C      -3.139111   -0.439677    1.647520 
C      -3.002476   -1.922792    2.009192 
O       2.304768    1.548534   -0.062778 
P       2.264866   -0.158280    0.019062 
C       3.296998   -0.529611   -1.498742 
C       4.522680    0.374836   -1.646382 
C      -3.296998   -0.529611   -1.498742 
C      -3.713900   -2.002170   -1.473221 
C      -4.522679    0.374837   -1.646382 
C      -2.359887   -0.279538   -2.688106 
C       3.139111   -0.439677    1.647520 
C       3.002475   -1.922791    2.009192 
C       4.608114   -0.022348    1.647261 
C       2.369509    0.394645    2.679321 
C       3.713900   -2.002170   -1.473220 
C       2.359887   -0.279539   -2.688106 
C      -4.608114   -0.022348    1.647261 
C      -2.369509    0.394644    2.679322 
H      -4.970058    0.179229   -2.626898 
H      -4.251125    1.431468   -1.607829 
H      -5.286542    0.182003   -0.894181 
H      -2.900854   -0.505491   -3.612851 
H      -1.469738   -0.911478   -2.646578 
H      -2.040219    0.765318   -2.738726 
H      -4.186410   -2.246554   -2.430047 
H      -4.442269   -2.210847   -0.686197 
H      -2.860084   -2.674438   -1.350136 
H      -4.984171   -0.084998    2.673856 
H      -5.225549   -0.682234    1.034593 
H      -4.741459    1.007493    1.307741 
H      -2.753942    0.153215    3.675463 
H      -2.503616    1.466612    2.516984 
H      -1.300081    0.166143    2.658807 
H      -3.476062   -2.084206    2.982893 
H      -1.954226   -2.219210    2.095892 
H      -3.493866   -2.583316    1.291551 
H       4.984171   -0.084997    2.673856 
H       4.741459    1.007493    1.307741 
H       5.225549   -0.682235    1.034594 
H       2.753941    0.153216    3.675463 
H       1.300080    0.166145    2.658806 
H       2.503616    1.466613    2.516984 
H       3.476061   -2.084205    2.982893 
H       3.493865   -2.583315    1.291552 
H       1.954225   -2.219209    2.095893 
H       4.186411   -2.246555   -2.430046 
H       2.860084   -2.674438   -1.350135 
H       4.442269   -2.210847   -0.686196 
H       2.900854   -0.505492   -3.612851 
H       2.040220    0.765318   -2.738726 
H       1.469739   -0.911479   -2.646578 
H       4.970058    0.179228   -2.626898 
H       5.286542    0.182003   -0.894180 
H       4.251125    1.431468   -1.607829 
H       2.161891    4.120897   -0.124660 
H      -2.161891    4.120897   -0.124660 
H       0.000000    5.388937   -0.160727 
H       0.883850   -3.240134   -0.096742 
H      -0.883849   -3.240134   -0.096742 
H       0.000000   -2.546717   -1.470309 
H       0.000000   -1.836949    0.819709 

71
REACTION A. TS, M06L-D3 (eps=6), 
G_raw (298.15 K) =  -1856.441161 Hartree
C       1.167602    2.247054   -0.119657 
N       0.000000    1.551940   -0.106411 
C      -1.167602    2.247054   -0.119657 
C      -1.205528    3.631309   -0.158783 
C       0.000000    4.317042   -0.180851 
C       1.205528    3.631309   -0.158783 
Ir      0.000000   -0.522613   -0.028391 
C       0.000000   -2.703232   -0.321566 
O      -2.309878    1.557366   -0.092021 
P      -2.263135   -0.156338    0.018943 
C      -3.148872   -0.403334    1.644543 
C      -2.995471   -1.876708    2.034612 
O       2.309878    1.557366   -0.092020 
P       2.263135   -0.156338    0.018943 
C       3.290061   -0.547235   -1.497351 
C       4.496490    0.374042   -1.682528 
C      -3.290061   -0.547235   -1.497351 
C      -3.734887   -2.008480   -1.423204 
C      -4.496491    0.374041   -1.682527 
C      -2.333968   -0.353420   -2.682338 
C       3.148872   -0.403334    1.644543 
C       2.995471   -1.876709    2.034612 
C       4.621235   -0.005444    1.615456 
C       2.396058    0.461315    2.663187 
C       3.734888   -2.008479   -1.423204 
C       2.333968   -0.353420   -2.682338 
C      -4.621235   -0.005444    1.615456 
C      -2.396058    0.461316    2.663187 
H      -4.950535    0.152349   -2.653912 
H      -4.209696    1.426824   -1.685405 
H      -5.266384    0.228243   -0.926153 
H      -2.868597   -0.566973   -3.613036 
H      -1.469270   -1.019701   -2.626042 
H      -1.965828    0.675439   -2.744782 
H      -4.204175   -2.288123   -2.371412 
H      -4.473083   -2.175664   -0.634866 
H      -2.896558   -2.693204   -1.263782 
H      -5.022102   -0.057684    2.632786 
H      -5.220339   -0.679336    0.999252 
H      -4.764742    1.017360    1.258643 
H      -2.780941    0.243843    3.663965 
H      -2.534486    1.528881    2.478021 
H      -1.323362    0.244110    2.658423 
H      -3.473657   -2.037602    3.005383 
H      -1.943346   -2.156295    2.134500 
H      -3.467350   -2.558451    1.323013 
H       5.022102   -0.057684    2.632786 
H       4.764742    1.017360    1.258643 
H       5.220340   -0.679336    0.999252 
H       2.780942    0.243842    3.663965 
H       1.323362    0.244108    2.658424 
H       2.534486    1.528880    2.478022 
H       3.473658   -2.037603    3.005383 
H       3.467352   -2.558451    1.323012 
H       1.943347   -2.156296    2.134499 
H       4.204175   -2.288123   -2.371412 
H       2.896559   -2.693204   -1.263782 
H       4.473084   -2.175663   -0.634867 
H       2.868596   -0.566973   -3.613036 
H       1.965827    0.675439   -2.744782 
H       1.469270   -1.019701   -2.626043 
H       4.950535    0.152349   -2.653911 
H       5.266383    0.228245   -0.926152 
H       4.209695    1.426825   -1.685407 
H       2.163427    4.132439   -0.167781 
H      -2.163427    4.132439   -0.167781 
H       0.000000    5.400578   -0.210469 
H       0.884192   -3.270738   -0.028807 
H      -0.884192   -3.270738   -0.028807 
H       0.000000   -2.601286   -1.413253 
H       0.000000   -1.852878    0.869958 

71
REACTION A. TS, M06L (eps=6), 
G_raw (298.15 K) =  -1856.432317
C       1.167563    2.246995   -0.119718 
N       0.000000    1.551872   -0.106399 
C      -1.167563    2.246995   -0.119717 
C      -1.205505    3.631271   -0.159143 
C       0.000000    4.317006   -0.181365 
C       1.205505    3.631271   -0.159144 
Ir      0.000000   -0.522757   -0.028116 
C      -0.000003   -2.703507   -0.321939 
O      -2.310011    1.557495   -0.091957 
P      -2.263884   -0.156214    0.018997 
C      -3.151469   -0.403100    1.643992 
C      -3.000461   -1.876707    2.034120 
O       2.310011    1.557494   -0.091959 
P       2.263884   -0.156214    0.018997 
C       3.292230   -0.547187   -1.496913 
C       4.496419    0.376877   -1.683515 
C      -3.292227   -0.547185   -1.496914 
C      -3.741742   -2.006911   -1.420741 
C      -4.496419    0.376876   -1.683516 
C      -2.336363   -0.357974   -2.682772 
C       3.151468   -0.403098    1.643993 
C       3.000460   -1.876704    2.034123 
C       4.623593   -0.004181    1.613415 
C       2.399756    0.460659    2.664181 
C       3.741749   -2.006911   -1.420736 
C       2.336366   -0.357982   -2.682771 
C      -4.623594   -0.004184    1.613415 
C      -2.399757    0.460655    2.664182 
H      -4.950923    0.154477   -2.654548 
H      -4.207239    1.428974   -1.688232 
H      -5.266778    0.234191   -0.927045 
H      -2.872097   -0.572334   -3.612700 
H      -1.473102   -1.026026   -2.625546 
H      -1.966050    0.669970   -2.747624 
H      -4.212202   -2.285938   -2.368588 
H      -4.480463   -2.170639   -0.632194 
H      -2.905853   -2.694419   -1.260731 
H      -5.025730   -0.057441    2.630220 
H      -5.222344   -0.677008    0.995730 
H      -4.766080    1.019115    1.257684 
H      -2.787076    0.243399    3.664114 
H      -2.536984    1.528383    2.478958 
H      -1.327221    0.242575    2.661772 
H      -3.479428   -2.036626    3.004701 
H      -1.948944   -2.158321    2.134568 
H      -3.473201   -2.557702    1.322435 
H       5.025730   -0.057436    2.630220 
H       4.766079    1.019117    1.257680 
H       5.222342   -0.677007    0.995731 
H       2.787075    0.243404    3.664114 
H       1.327220    0.242578    2.661771 
H       2.536983    1.528387    2.478955 
H       3.479429   -2.036621    3.004704 
H       3.473199   -2.557700    1.322438 
H       1.948944   -2.158317    2.134573 
H       4.212215   -2.285938   -2.368581 
H       2.905863   -2.694423   -1.260729 
H       4.480467   -2.170636   -0.632185 
H       2.872101   -0.572344   -3.612698 
H       1.966049    0.669960   -2.747627 
H       1.473107   -1.026037   -2.625544 
H       4.950920    0.154481   -2.654549 
H       5.266780    0.234190   -0.927047 
H       4.207237    1.428974   -1.688227 
H       2.163317    4.132567   -0.168256 
H      -2.163317    4.132567   -0.168254 
H       0.000000    5.400570   -0.211279 
H       0.884203   -3.271125   -0.029274 
H      -0.884207   -3.271125   -0.029265 
H      -0.000009   -2.601801   -1.413671 
H       0.000000   -1.853070    0.870094 

71
REACTION A. TS, B3LYP (eps=6), 
G_raw (298.15 K) =  -1856.603054 Hartree
C       1.168229    2.248814   -0.094964 
N       0.000000    1.554975   -0.084905 
C      -1.168229    2.248814   -0.094964 
C      -1.207322    3.635245   -0.134441 
C       0.000000    4.323145   -0.156999 
C       1.207322    3.635245   -0.134442 
Ir      0.000000   -0.519698   -0.034240 
C       0.000000   -2.714959   -0.388316 
O      -2.316422    1.557716   -0.061081 
P      -2.294800   -0.161833    0.021312 
C      -3.193634   -0.431085    1.665913 
C      -3.121903   -1.931171    2.016154 
O       2.316422    1.557716   -0.061081 
P       2.294800   -0.161833    0.021312 
C       3.335017   -0.527464   -1.521788 
C       4.568173    0.383709   -1.666562 
C      -3.335017   -0.527464   -1.521788 
C      -3.759900   -2.008119   -1.512495 
C      -4.568173    0.383709   -1.666562 
C      -2.393149   -0.269890   -2.718104 
C       3.193634   -0.431085    1.665913 
C       3.121903   -1.931171    2.016154 
C       4.654731    0.046565    1.664308 
C       2.397977    0.366207    2.721479 
C       3.759900   -2.008119   -1.512495 
C       2.393149   -0.269891   -2.718104 
C      -4.654731    0.046566    1.664308 
C      -2.397977    0.366207    2.721479 
H      -5.011990    0.200082   -2.650136 
H      -4.299444    1.439369   -1.613927 
H      -5.334132    0.181211   -0.920531 
H      -2.930430   -0.502893   -3.642092 
H      -1.497885   -0.892096   -2.675668 
H      -2.083605    0.776581   -2.771876 
H      -4.227931   -2.241862   -2.473255 
H      -4.492859   -2.223376   -0.733226 
H      -2.911096   -2.684962   -1.390882 
H      -5.036435   -0.005752    2.688625 
H      -5.295718   -0.584442    1.047893 
H      -4.748372    1.080948    1.328904 
H      -2.816562    0.146323    3.707855 
H      -2.472528    1.443041    2.559482 
H      -1.343162    0.084234    2.727376 
H      -3.594529   -2.080801    2.991278 
H      -2.090273   -2.279584    2.092103 
H      -3.649090   -2.559790    1.297150 
H       5.036435   -0.005752    2.688625 
H       4.748372    1.080948    1.328903 
H       5.295718   -0.584443    1.047893 
H       2.816562    0.146324    3.707855 
H       1.343162    0.084235    2.727376 
H       2.472529    1.443041    2.559482 
H       3.594529   -2.080801    2.991278 
H       3.649090   -2.559790    1.297150 
H       2.090272   -2.279584    2.092103 
H       4.227931   -2.241862   -2.473254 
H       2.911096   -2.684962   -1.390882 
H       4.492859   -2.223376   -0.733226 
H       2.930430   -0.502894   -3.642092 
H       2.083605    0.776580   -2.771876 
H       1.497885   -0.892096   -2.675668 
H       5.011990    0.200081   -2.650136 
H       5.334132    0.181211   -0.920531 
H       4.299444    1.439369   -1.613927 
H       2.163244    4.137883   -0.142227 
H      -2.163244    4.137883   -0.142227 
H       0.000000    5.405709   -0.187067 
H       0.885001   -3.281158   -0.102218 
H      -0.885001   -3.281158   -0.102218 
H       0.000000   -2.584607   -1.473724 
H       0.000000   -1.866434    0.818176 

90
REACTION B. REACTANT, PBE, conformer b_asym
G_raw (298.15 K) =    -2332.409191 Hartree, 
C       2.306547    4.706460    0.565935 
C       2.395881    3.418661   -0.005283 
C       3.624620    3.017954   -0.567178 
C       4.726416    3.879175   -0.557883 
C       4.627668    5.150053    0.019040 
C       3.411100    5.559182    0.581684 
C       1.177307    2.570295   -0.015020 
C       1.176981    1.152553   -0.036899 
N       0.006517    0.468839    0.025659 
C      -1.167697    1.143365    0.107292 
C      -1.179374    2.561595    0.081350 
N      -0.003441    3.205771    0.031102 
C      -2.404860    3.399577    0.042672 
C      -2.312390    4.682782   -0.539188 
C      -3.424730    5.523141   -0.598143 
C      -4.653729    5.106314   -0.069238 
C      -4.756110    3.840505    0.517995 
C      -3.646126    2.990972    0.570805 
O      -2.307153    0.431691    0.196965 
P      -2.273258   -1.309482   -0.000507 
C      -3.317287   -1.811054    1.506341 
C      -2.365927   -1.853632    2.720614 
Ir      0.011116   -1.656088   -0.035179 
C       0.018121   -3.752772   -0.208976 
O       2.324179    0.449498   -0.112151 
P       2.286959   -1.296448    0.038367 
C       3.306331   -1.763130   -1.488688 
C       2.334273   -1.625949   -2.680301 
C       3.182532   -1.511230    1.696115 
C       2.487150   -0.566901    2.698747 
C       2.974163   -2.973714    2.139274 
C       4.679103   -1.166052    1.633983 
C      -3.173121   -1.453020   -1.667033 
C      -2.345724   -0.616890   -2.669173 
C      -3.143016   -2.933317   -2.098486 
C      -4.614445   -0.920929   -1.633756 
C      -3.885605   -3.223812    1.263484 
C      -4.451022   -0.812695    1.802627 
C       4.528846   -0.862259   -1.731758 
C       3.732586   -3.237552   -1.338663 
H      -5.015561   -0.940313   -2.660841 
H      -4.660222    0.118503   -1.277136 
H      -5.275741   -1.543181   -1.014673 
H      -2.809691   -0.723057   -3.663254 
H      -1.303663   -0.962999   -2.760357 
H      -2.345003    0.453371   -2.417371 
H      -3.533810   -3.001378   -3.126725 
H      -3.771246   -3.571315   -1.463098 
H      -2.122115   -3.342760   -2.098939 
H      -5.028865   -1.201739    2.657056 
H      -5.143980   -0.680587    0.963404 
H      -4.053090    0.169560    2.090768 
H      -2.966425   -2.071666    3.618911 
H      -1.856711   -0.892048    2.886680 
H      -1.608399   -2.644002    2.618901 
H      -4.329531   -3.579047    2.207640 
H      -3.107491   -3.947872    0.976043 
H      -4.679207   -3.233237    0.503377 
H       5.088374   -1.221819    2.656143 
H       4.850795   -0.144692    1.264295 
H       5.249362   -1.873750    1.016033 
H       2.902094   -0.765827    3.699867 
H       1.400639   -0.735375    2.748223 
H       2.671185    0.490490    2.461422 
H       3.442343   -3.105976    3.128257 
H       3.439432   -3.696366    1.453806 
H       1.906405   -3.219058    2.232806 
H       4.183264   -3.565856   -2.289389 
H       2.878212   -3.900488   -1.132736 
H       4.486690   -3.375876   -0.550928 
H       2.885985   -1.843706   -3.609551 
H       1.927082   -0.607421   -2.770529 
H       1.503557   -2.344867   -2.615895 
H       5.016772   -1.199067   -2.661404 
H       5.273109   -0.915642   -0.928454 
H       4.237740    0.187314   -1.873899 
H       0.881586   -4.236797    0.271586 
H      -0.889668   -4.236889    0.181349 
H       0.073646   -3.988275   -1.291506 
H      -0.000336   -1.754982    1.499088 
H      -1.352857    5.005265   -0.946367 
H      -3.333352    6.507923   -1.062039 
H      -5.524335    5.764318   -0.114767 
H      -5.706169    3.508599    0.942896 
H      -3.744827    2.012403    1.035880 
H       3.717348    2.036160   -1.027069 
H       5.666249    3.553203   -1.009310 
H       5.491545    5.818340    0.029565 
H       3.323164    6.548419    1.036603 
H       1.355774    5.023926    0.996980 

90
REACTION B. REACTANT, PBE-D3BJ, conformer c_sym
G_raw (298.15 K) =    -2332.558979 Hartree
C      -3.638949    2.943307   -0.623984 
C      -2.407133    3.393460   -0.107268 
C      -2.332414    4.701247    0.414746 
C      -3.456870    5.526623    0.434630 
C      -4.677951    5.068021   -0.077150 
C      -4.760596    3.777380   -0.610788 
C      -1.175780    2.568655   -0.114536 
N       0.001436    3.213693   -0.109245 
C       1.177638    2.567488   -0.105671 
C       1.172337    1.152106   -0.082649 
N       0.000531    0.472170   -0.055374 
C      -1.170949    1.153281   -0.085942 
C       2.409942    3.390235   -0.080835 
C       2.337477    4.685379    0.471763 
C       3.463306    5.508381    0.509216 
C       4.682852    5.059629   -0.014768 
C       4.763134    3.781359   -0.577975 
C       3.640140    2.949549   -0.608829 
O       2.316738    0.448013   -0.054033 
P       2.268332   -1.297968   -0.005141 
C       3.237823   -1.554402    1.585478 
C       4.452924   -0.624224    1.727358 
Ir     -0.002414   -1.649648    0.072946 
P      -2.269482   -1.295140    0.014707 
C      -3.228653   -1.705693   -1.550406 
C      -4.714173   -1.328926   -1.465875 
O      -2.315851    0.449789   -0.056181 
C       3.200070   -1.689823   -1.591490 
C       4.689614   -1.325569   -1.527404 
C       2.521723   -0.879119   -2.713152 
C       3.015112   -3.195753   -1.862614 
C      -0.004339   -3.733078    0.321567 
C      -3.209022   -1.532404    1.627178 
C      -3.615015   -3.012522    1.732672 
C      -2.170236   -1.200466    2.718776 
C      -4.421143   -0.600840    1.781400 
C      -2.562969   -0.920816   -2.697558 
C      -3.058977   -3.216877   -1.801061 
C       2.222049   -1.236047    2.702032 
C       3.646080   -3.035521    1.663428 
H       4.864640   -0.755345    2.741349 
H       4.171448    0.431341    1.609630 
H       5.251296   -0.857477    1.013383 
H       2.735264   -1.311767    3.674302 
H       1.388161   -1.955244    2.716136 
H       1.819801   -0.214920    2.619990 
H       4.054398   -3.234028    2.667215 
H       4.425840   -3.289449    0.931614 
H       2.786778   -3.707808    1.515504 
H       5.129230   -1.486917   -2.524870 
H       5.242110   -1.957093   -0.818630 
H       4.844273   -0.270598   -1.260106 
H       2.955677   -1.194081   -3.675100 
H       2.692089    0.200509   -2.600491 
H       1.437493   -1.059215   -2.759049 
H       3.520344   -3.440234   -2.810520 
H       1.952939   -3.460461   -1.962874 
H       3.458557   -3.825212   -1.078127 
H      -5.172504   -1.501495   -2.452949 
H      -4.857066   -0.269133   -1.211140 
H      -5.258230   -1.946406   -0.738511 
H      -3.030153   -1.235810   -3.643886 
H      -1.485207   -1.128542   -2.771071 
H      -2.704927    0.163637   -2.592937 
H      -3.587214   -3.473080   -2.733227 
H      -3.487148   -3.831901   -0.996971 
H      -2.000670   -3.487991   -1.922682 
H      -3.999489   -3.198045    2.748299 
H      -2.760202   -3.687878    1.573020 
H      -4.412027   -3.274930    1.023020 
H      -2.657321   -1.283269    3.703753 
H      -1.783158   -0.174526    2.626041 
H      -1.326620   -1.908907    2.710006 
H      -4.813684   -0.719415    2.804523 
H      -5.232698   -0.842732    1.085328 
H      -4.142147    0.453199    1.645439 
H      -0.901391   -4.231470   -0.072666 
H       0.874455   -4.234353   -0.109130 
H       0.018145   -3.920415    1.414917 
H      -0.012341   -1.836281   -1.454322 
H       1.383495    5.031131    0.872651 
H       3.390280    6.504702    0.950476 
H       5.563943    5.704045    0.013931 
H       5.705496    3.426581   -1.000807 
H       3.718587    1.961264   -1.058380 
H      -1.376924    5.055430    0.804244 
H      -3.381462    6.532895    0.852274 
H      -5.558059    5.714246   -0.062129 
H      -5.703953    3.414234   -1.024244 
H      -3.720210    1.945135   -1.050221 

90
REACTION B. REACTANT, PBE-D3, conformer c_sym
G_raw (298.15 K) =   -2332.493300 Hartree
C      -3.661293    2.912075   -0.660929 
C      -2.439254    3.368727   -0.125173 
C      -2.384709    4.672247    0.411620 
C      -3.518356    5.485882    0.428168 
C      -4.729487    5.019948   -0.101210 
C      -4.792352    3.734171   -0.650145 
C      -1.198596    2.555445   -0.123597 
N      -0.027450    3.211289   -0.109110 
C       1.154572    2.576024   -0.090024 
C       1.161774    1.160352   -0.055855 
N      -0.003617    0.468637   -0.040422 
C      -1.180232    1.139559   -0.091615 
C       2.380261    3.410995   -0.061445 
C       2.299312    4.701498    0.502164 
C       3.418053    5.535153    0.539019 
C       4.638866    5.102356    0.003799 
C       4.727790    3.828905   -0.570019 
C       3.612074    2.986821   -0.600317 
O       2.313237    0.468461   -0.003843 
P       2.283418   -1.279314   -0.003740 
C       3.303994   -1.569567    1.554634 
C       4.510959   -0.624419    1.690474 
Ir      0.015240   -1.658205    0.094539 
P      -2.260722   -1.316406    0.026099 
C      -3.204531   -1.758736   -1.548192 
C      -4.695899   -1.393086   -1.490318 
O      -2.319236    0.426556   -0.078967 
C       3.175967   -1.617320   -1.633791 
C       4.667482   -1.250622   -1.599093 
C       2.465666   -0.770585   -2.710635 
C       2.987127   -3.114579   -1.953116 
C       0.035081   -3.747453    0.341847 
C      -3.220114   -1.513971    1.640232 
C      -3.592411   -2.999176    1.802747 
C      -2.214034   -1.103456    2.738593 
C      -4.460094   -0.608046    1.740073 
C      -2.532423   -0.985036   -2.701633 
C      -3.022733   -3.273631   -1.775251 
C       2.319266   -1.301382    2.713305 
C       3.739296   -3.046703    1.572975 
H       4.951135   -0.776918    2.689714 
H       4.213065    0.430368    1.609326 
H       5.295437   -0.826038    0.951401 
H       2.858175   -1.423010    3.667069 
H       1.480666   -2.014996    2.717554 
H       1.920611   -0.275534    2.688193 
H       4.194486   -3.266080    2.552256 
H       4.491465   -3.267925    0.801999 
H       2.885850   -3.730317    1.443230 
H       5.081304   -1.382609   -2.612015 
H       5.241379   -1.899726   -0.923520 
H       4.828454   -0.202820   -1.307373 
H       2.876921   -1.049330   -3.693855 
H       2.633939    0.306077   -2.567097 
H       1.380897   -0.953218   -2.738034 
H       3.466563   -3.324516   -2.922781 
H       1.923090   -3.379728   -2.034439 
H       3.453886   -3.770694   -1.204486 
H      -5.136396   -1.579588   -2.483288 
H      -4.853106   -0.332015   -1.248799 
H      -5.248410   -2.009161   -0.767528 
H      -2.991694   -1.313882   -3.647470 
H      -1.453099   -1.188316   -2.767425 
H      -2.679167    0.100527   -2.613268 
H      -3.550662   -3.549895   -2.702163 
H      -3.445358   -3.879662   -0.960785 
H      -1.962712   -3.539713   -1.895077 
H      -3.994424   -3.151527    2.817497 
H      -2.719066   -3.660347    1.689326 
H      -4.368468   -3.311570    1.089622 
H      -2.735524   -1.120571    3.709696 
H      -1.829624   -0.082287    2.593578 
H      -1.367697   -1.803000    2.817958 
H      -4.862406   -0.694629    2.762789 
H      -5.258222   -0.899630    1.047697 
H      -4.208409    0.447446    1.564755 
H      -0.864136   -4.255181   -0.035766 
H       0.910976   -4.245013   -0.100231 
H       0.074760   -3.928260    1.436062 
H       0.013446   -1.844544   -1.432311 
H       1.345259    5.036982    0.912475 
H       3.338076    6.527471    0.988578 
H       5.513985    5.755278    0.031762 
H       5.670712    3.486189   -1.002024 
H       3.698175    2.003258   -1.059468 
H      -1.437892    5.033627    0.816249 
H      -3.457757    6.488434    0.857593 
H      -5.616897    5.656551   -0.088132 
H      -5.727403    3.365322   -1.077778 
H      -3.728763    1.918377   -1.100673 

90
REACTION B. REACTANT, B3LYP-D2, conformer c_sym
G_raw (298.15 K) = -2334.946966
C      -3.628351    2.934425   -0.609911 
C      -2.419151    3.392350   -0.063205 
C      -2.371309    4.688605    0.474649 
C      -3.502400    5.497633    0.479429 
C      -4.701567    5.031880   -0.062851 
C      -4.756789    3.751373   -0.611535 
C      -1.182398    2.575702   -0.057481 
N      -0.010854    3.216531   -0.059941 
C       1.162897    2.581541   -0.037795 
C       1.160155    1.175682    0.006378 
N      -0.003260    0.501841    0.009651 
C      -1.170510    1.168867   -0.018321 
C       2.396565    3.401702   -0.029270 
C       2.353877    4.678120    0.552952 
C       3.483489    5.489624    0.564991 
C       4.673517    5.045109   -0.013947 
C       4.722861    3.783255   -0.605472 
C       3.596336    2.963962   -0.610673 
O       2.298398    0.469196    0.084335 
P       2.266894   -1.254253    0.014039 
C       3.282272   -1.663382    1.511980 
C       4.498587   -0.745483    1.703166 
Ir      0.005096   -1.640435    0.094782 
P      -2.258819   -1.270880    0.022507 
C      -3.127975   -1.642551   -1.574566 
C      -4.634136   -1.358291   -1.536001 
O      -2.304042    0.453198    0.028957 
C       3.110005   -1.554513   -1.612893 
C       4.613082   -1.252099   -1.591767 
C       2.420195   -0.641541   -2.644920 
C       2.848936   -3.025841   -1.984975 
C       0.023259   -3.744316    0.292283 
C      -3.246235   -1.620033    1.554161 
C      -3.623776   -3.110856    1.538522 
C      -2.277208   -1.345055    2.722195 
C      -4.486942   -0.728823    1.713917 
C      -2.468795   -0.767600   -2.657498 
C      -2.858335   -3.125563   -1.891478 
C       2.321340   -1.499053    2.708361 
C       3.704368   -3.138668    1.401230 
H       4.969244   -1.006478    2.656712 
H       4.198441    0.303552    1.742312 
H       5.239983   -0.869732    0.915131 
H       2.887170   -1.664793    3.630232 
H       1.516003   -2.237605    2.669251 
H       1.892884   -0.493658    2.750705 
H       4.165599   -3.433942    2.348676 
H       4.435733   -3.294018    0.605943 
H       2.843391   -3.791030    1.226317 
H       4.999707   -1.364209   -2.609540 
H       5.157581   -1.943948   -0.947366 
H       4.811296   -0.229446   -1.262076 
H       2.800475   -0.904496   -3.636318 
H       2.643171    0.411406   -2.460433 
H       1.335980   -0.776090   -2.647185 
H       3.300314   -3.214683   -2.963837 
H       1.777593   -3.228883   -2.046503 
H       3.294711   -3.717184   -1.266843 
H      -5.037854   -1.513070   -2.541492 
H      -4.840801   -0.327404   -1.239001 
H      -5.155364   -2.034783   -0.856832 
H      -2.877182   -1.066662   -3.627293 
H      -1.385521   -0.906012   -2.685927 
H      -2.685608    0.291720   -2.504752 
H      -3.331892   -3.359414   -2.849905 
H      -3.278435   -3.791646   -1.134718 
H      -1.786579   -3.319288   -1.971571 
H      -4.067943   -3.362336    2.506558 
H      -2.745313   -3.747075    1.393316 
H      -4.357918   -3.334646    0.761407 
H      -2.818231   -1.495911    3.661412 
H      -1.909018   -0.315202    2.706345 
H      -1.426101   -2.031902    2.711726 
H      -4.920091   -0.931462    2.698954 
H      -5.246918   -0.936137    0.962663 
H      -4.220669    0.329036    1.666316 
H      -0.877495   -4.230648   -0.094131 
H       0.886033   -4.220525   -0.184386 
H       0.081110   -3.975903    1.369489 
H       0.001391   -1.792239   -1.426755 
H       1.427602    5.021865    0.995537 
H       3.436098    6.469267    1.026644 
H       5.553432    5.678113   -0.005917 
H       5.638976    3.434049   -1.067854 
H       3.649587    1.991610   -1.078259 
H      -1.438291    5.050711    0.886774 
H      -3.448892    6.492326    0.907004 
H      -5.583178    5.662571   -0.059691 
H      -5.679785    3.384485   -1.045739 
H      -3.689170    1.947474   -1.043767 

90
REACTION B. REACTANT, B3LYP-D3, conformer a_sym
G_raw (298.15 K) = -2334.877131 Hartree
C       1.158983    1.149038   -0.266122 
N      -0.003358    0.472847   -0.233040 
C      -1.168799    1.142452   -0.238137 
C      -1.178090    2.549168   -0.241045 
N      -0.010716    3.194943   -0.236029 
C       1.162307    2.556240   -0.258049 
Ir      0.005820   -1.655256    0.016577 
C       0.028330   -3.758461    0.157827 
O      -2.308453    0.434882   -0.201401 
P      -2.279926   -1.271970    0.041801 
C      -3.175365   -1.388574    1.691811 
C      -2.959941   -2.815415    2.233976 
O       2.301040    0.442609   -0.267463 
P       2.286851   -1.254611    0.037099 
C       3.289837   -1.843934   -1.435411 
C       4.557459   -1.017821   -1.712504 
C      -3.258444   -1.803254   -1.469830 
C      -3.507991   -3.318759   -1.357341 
C      -4.578935   -1.041428   -1.677006 
C      -2.329330   -1.511050   -2.670653 
C       3.167512   -1.302273    1.699105 
C       2.953331   -2.706313    2.299394 
C       4.666372   -0.977087    1.610125 
C       2.481122   -0.249068    2.595781 
C       3.636871   -3.326628   -1.202928 
C       2.340626   -1.715073   -2.648215 
C      -4.674982   -1.066235    1.603908 
C      -2.499102   -0.372202    2.636941 
H      -4.966015   -1.292349   -2.668898 
H      -4.434712    0.038603   -1.638575 
H      -5.340374   -1.315439   -0.951099 
H      -2.845242   -1.808628   -3.587749 
H      -1.396152   -2.076531   -2.628425 
H      -2.095122   -0.447317   -2.753173 
H      -3.936602   -3.673991   -2.298585 
H      -4.217711   -3.557342   -0.562981 
H      -2.583815   -3.874303   -1.180151 
H      -5.080258   -1.032186    2.619418 
H      -5.226890   -1.832774    1.059597 
H      -4.857839   -0.095690    1.139035 
H      -2.931221   -0.494889    3.633764 
H      -2.675585    0.655836    2.316864 
H      -1.423101   -0.534282    2.721371 
H      -3.455670   -2.894153    3.205473 
H      -1.900706   -3.034923    2.373735 
H      -3.387999   -3.580571    1.583524 
H       5.069022   -0.925144    2.625978 
H       4.846045   -0.012453    1.131752 
H       5.222812   -1.749206    1.078407 
H       2.892415   -0.339966    3.604686 
H       1.401863   -0.396842    2.663869 
H       2.673772    0.765553    2.243930 
H       3.432444   -2.737689    3.281798 
H       3.398956   -3.495372    1.691078 
H       1.893752   -2.929797    2.430542 
H       4.073079   -3.731094   -2.120517 
H       2.751341   -3.921701   -0.965770 
H       4.371051   -3.455370   -0.405740 
H       2.887030   -2.001202   -3.551164 
H       1.991418   -0.688588   -2.784625 
H       1.475172   -2.377288   -2.570593 
H       4.995518   -1.371558   -2.650425 
H       5.311835   -1.126645   -0.937219 
H       4.329011    0.041619   -1.830371 
C       2.397049    3.374507   -0.206843 
C      -2.421254    3.353325   -0.186521 
H       0.899762   -4.159497    0.680166 
H      -0.860525   -4.183048    0.629303 
H       0.062547   -4.141097   -0.874537 
H       0.004063   -1.559150    1.545656 
C       2.366272    4.599037    0.478257 
C       3.501008    5.399385    0.548368 
C       4.683602    4.997457   -0.073606 
C       4.720125    3.790090   -0.768836 
C       3.588143    2.981919   -0.833487 
H       1.446991    4.912861    0.956024 
H       3.463337    6.337476    1.090123 
H       5.567801    5.621917   -0.018561 
H       5.630165    3.475381   -1.266462 
H       3.626787    2.055150   -1.386039 
C      -2.423185    4.551210    0.542992 
C      -3.570190    5.334861    0.610314 
C      -4.729194    4.941970   -0.059823 
C      -4.731578    3.760773   -0.800098 
C      -3.588093    2.969020   -0.861168 
H      -1.521489    4.856950    1.058659 
H      -3.560363    6.252710    1.186814 
H      -5.622395    5.553705   -0.007374 
H      -5.623192    3.454968   -1.335201 
H      -3.596071    2.063080   -1.449961 

90
REACTION B. REACTANT, M11L, conformer a_sym
G_raw (298.15 K) = 	-2334.485930 Hartree
C       1.151655    1.070286   -0.308370 
N       0.000239    0.418447   -0.246741 
C      -1.135622    1.098515   -0.279688 
C      -1.128979    2.495992   -0.274519 
N       0.032874    3.117635   -0.273445 
C       1.178816    2.467187   -0.308521 
Ir     -0.025460   -1.661805    0.111176 
C      -0.029716   -3.706012    0.429286 
O      -2.257200    0.412564   -0.286803 
P      -2.270774   -1.234285    0.025101 
C      -3.293093   -1.214922    1.568252 
C      -3.171550   -2.578883    2.221721 
O       2.256289    0.355797   -0.340778 
P       2.246351   -1.268183    0.066719 
C       3.185392   -1.949440   -1.374783 
C       4.346815   -1.090118   -1.830688 
C      -3.129832   -1.831526   -1.500225 
C      -3.590084   -3.256757   -1.260087 
C      -4.274434   -0.958343   -1.972078 
C      -2.054555   -1.825888   -2.580969 
C       3.185921   -1.173274    1.659904 
C       2.986768   -2.488410    2.390074 
C       4.658281   -0.860137    1.494517 
C       2.545718   -0.047075    2.457957 
C       3.638439   -3.354660   -1.028029 
C       2.175030   -2.014382   -2.513177 
C      -4.743424   -0.850625    1.330294 
C      -2.674218   -0.163985    2.476882 
H      -4.670231   -1.389761   -2.904103 
H      -3.939720    0.059056   -2.209345 
H      -5.109314   -0.896943   -1.268319 
H      -2.516148   -2.072974   -3.547982 
H      -1.272030   -2.580838   -2.403983 
H      -1.577246   -0.840558   -2.698271 
H      -3.919759   -3.693950   -2.213707 
H      -4.439366   -3.315790   -0.567354 
H      -2.781670   -3.897060   -0.875378 
H      -5.240088   -0.736572    2.305533 
H      -5.295271   -1.623338    0.780278 
H      -4.847918    0.107224    0.800206 
H      -3.160154   -0.227646    3.461194 
H      -2.831591    0.854852    2.097576 
H      -1.597919   -0.314822    2.640201 
H      -3.738733   -2.575379    3.163824 
H      -2.127253   -2.821589    2.462872 
H      -3.575450   -3.391585    1.603506 
H       5.096221   -0.712315    2.493244 
H       4.822332    0.069068    0.930339 
H       5.221963   -1.671134    1.016492 
H       2.943285   -0.075372    3.482485 
H       1.452551   -0.136971    2.533882 
H       2.786071    0.939695    2.038763 
H       3.514554   -2.445873    3.353759 
H       3.384891   -3.351706    1.840322 
H       1.925264   -2.679052    2.599762 
H       4.023814   -3.841046   -1.935608 
H       2.812631   -3.979933   -0.655303 
H       4.446531   -3.368380   -0.286202 
H       2.696439   -2.277768   -3.444832 
H       1.677055   -1.047359   -2.685796 
H       1.406077   -2.785688   -2.349503 
H       4.807670   -1.575682   -2.703981 
H       5.133354   -0.963101   -1.081300 
H       4.011808   -0.097879   -2.157838 
C       2.407169    3.267576   -0.267754 
C      -2.336892    3.324277   -0.197376 
H       0.820475   -4.084823    1.019174 
H      -0.937809   -4.110670    0.903139 
H       0.045866   -4.204754   -0.560680 
H      -0.045542   -1.480446    1.634501 
C       2.342952    4.535140    0.306253 
C       3.461053    5.336662    0.369931 
C       4.666756    4.893635   -0.142379 
C       4.740600    3.642638   -0.722935 
C       3.624700    2.832109   -0.782383 
H       1.391314    4.882341    0.708483 
H       3.393251    6.322909    0.831140 
H       5.552150    5.528731   -0.090446 
H       5.682852    3.289765   -1.144437 
H       3.700699    1.859416   -1.262510 
C      -2.233102    4.584814    0.385807 
C      -3.331603    5.410712    0.477254 
C      -4.556473    4.999497   -0.016219 
C      -4.669832    3.755089   -0.604070 
C      -3.574059    2.920201   -0.690687 
H      -1.266896    4.907453    0.773761 
H      -3.232703    6.391216    0.945545 
H      -5.425670    5.654175    0.057367 
H      -5.627834    3.426809   -1.009355 
H      -3.682096    1.953196   -1.176172 

90
REACTION B. REACTANT, M06L, conformer c_sym
G_raw (298.15 K) = -2334.511175 Hartrees
C      -3.635228    2.918320   -0.653396 
C      -2.416489    3.359746   -0.120311 
C      -2.355385    4.648934    0.427894 
C      -3.478373    5.462157    0.459040 
C      -4.686017    5.009969   -0.066798 
C      -4.755893    3.739837   -0.628432 
C      -1.186110    2.544796   -0.129478 
N      -0.019297    3.191843   -0.119442 
C       1.155227    2.559380   -0.098586 
C       1.155038    1.153124   -0.058974 
N      -0.003282    0.473362   -0.047284 
C      -1.169234    1.138201   -0.094953 
C       2.375355    3.389195   -0.067701 
C       2.291600    4.678567    0.477027 
C       3.404468    5.505113    0.520748 
C       4.623943    5.066694    0.010818 
C       4.716589    3.795948   -0.546268 
C       3.606497    2.961081   -0.582558 
O       2.292166    0.454535    0.011895 
P       2.276069   -1.267357    0.002072 
C       3.295434   -1.563993    1.535963 
C       4.485598   -0.615560    1.687956 
Ir      0.011122   -1.677053    0.092761 
P      -2.261014   -1.294250    0.022052 
C      -3.201071   -1.712380   -1.536212 
C      -4.687451   -1.372274   -1.463509 
O      -2.298431    0.424887   -0.063877 
C       3.167832   -1.586376   -1.608011 
C       4.655731   -1.250032   -1.556323 
C       2.493566   -0.714284   -2.674216 
C       2.957886   -3.063423   -1.957220 
C       0.024746   -3.765654    0.323172 
C      -3.225073   -1.501414    1.608040 
C      -3.635790   -2.969187    1.737641 
C      -2.227011   -1.144247    2.719083 
C      -4.437595   -0.576574    1.726191 
C      -2.558908   -0.915244   -2.677772 
C      -3.002828   -3.210421   -1.792530 
C       2.323984   -1.335081    2.701908 
C       3.750906   -3.024921    1.529723 
H       4.924826   -0.774286    2.677937 
H       4.185506    0.432341    1.624270 
H       5.270937   -0.795718    0.955260 
H       2.863461   -1.459523    3.645620 
H       1.502824   -2.058002    2.700987 
H       1.904549   -0.324277    2.699105 
H       4.212511   -3.258553    2.493875 
H       4.496604   -3.224222    0.756328 
H       2.914639   -3.717607    1.392846 
H       5.078579   -1.369952   -2.558564 
H       5.211089   -1.913152   -0.890377 
H       4.833850   -0.216992   -1.247351 
H       2.887567   -0.996874   -3.654708 
H       2.700951    0.348274   -2.528566 
H       1.409035   -0.850752   -2.704654 
H       3.460875   -3.277465   -2.904958 
H       1.897825   -3.299933   -2.079286 
H       3.374039   -3.740829   -1.207308 
H      -5.135529   -1.550094   -2.446016 
H      -4.859227   -0.323479   -1.209226 
H      -5.224248   -1.997590   -0.747425 
H      -3.002017   -1.244048   -3.622221 
H      -1.480276   -1.078697   -2.748497 
H      -2.737868    0.158117   -2.584003 
H      -3.536542   -3.485944   -2.706902 
H      -3.395653   -3.834998   -0.985999 
H      -1.947720   -3.459160   -1.931765 
H      -4.041766   -3.139502    2.739271 
H      -2.788151   -3.649682    1.610089 
H      -4.413234   -3.245870    1.021595 
H      -2.749646   -1.157625    3.680475 
H      -1.808494   -0.140470    2.596061 
H      -1.406586   -1.863950    2.795856 
H      -4.845467   -0.675259    2.737101 
H      -5.236916   -0.828513    1.030955 
H      -4.168253    0.471660    1.580593 
H      -0.862615   -4.262558   -0.078235 
H       0.901723   -4.257614   -0.107462 
H       0.042411   -3.963111    1.407206 
H       0.011668   -1.847454   -1.437437 
H       1.339286    5.019368    0.868150 
H       3.321189    6.495689    0.955685 
H       5.494443    5.713208    0.044280 
H       5.658189    3.449836   -0.959810 
H       3.698312    1.980824   -1.031467 
H      -1.412170    4.999593    0.831857 
H      -3.412614    6.452718    0.897132 
H      -5.564867    5.645448   -0.042261 
H      -5.688043    3.383515   -1.054580 
H      -3.708665    1.938560   -1.106666 

90
REACTION B. REACTANT, PBE0, conformer c_sym
G_raw (298.15 K) = -2332.575989 Hartree
C      -3.607730    2.950004   -0.641289 
C      -2.391875    3.373548   -0.094583 
C      -2.316429    4.657245    0.458585 
C      -3.426549    5.487729    0.476529 
C      -4.632380    5.056584   -0.068136 
C      -4.715473    3.788620   -0.630519 
C      -1.168237    2.543015   -0.106336 
N       0.000109    3.176371   -0.103999 
C       1.167889    2.542428   -0.104419 
C       1.161011    1.137729   -0.082607 
N      -0.000310    0.470091   -0.055573 
C      -1.161548    1.138234   -0.081805 
C       2.392299    3.371497   -0.086517 
C       2.320695    4.647179    0.485153 
C       3.431845    5.476216    0.509172 
C       4.634394    5.051343   -0.047517 
C       4.713598    3.791083   -0.627658 
C       3.604913    2.953828   -0.644544 
O       2.293182    0.434483   -0.058245 
P       2.269172   -1.279843    0.000648 
C       3.216441   -1.534668    1.590371 
C       4.426616   -0.611647    1.744846 
Ir     -0.000625   -1.640929    0.068788 
P      -2.269589   -1.279363    0.007286 
C      -3.221874   -1.690647   -1.547040 
C      -4.705949   -1.334270   -1.470209 
O      -2.293651    0.434850   -0.054386 
C       3.214615   -1.688740   -1.558523 
C       4.698773   -1.331409   -1.488347 
C       2.563593   -0.899097   -2.700759 
C       3.037502   -3.188891   -1.823567 
C      -0.000752   -3.713220    0.308860 
C      -3.209017   -1.532388    1.602019 
C      -3.618231   -3.004294    1.703478 
C      -2.193385   -1.211779    2.707409 
C      -4.418850   -0.609899    1.761387 
C      -2.576516   -0.902018   -2.693186 
C      -3.045133   -3.191023   -1.811043 
C       2.206710   -1.215928    2.701666 
C       3.627106   -3.006423    1.687599 
H       4.827862   -0.747418    2.754712 
H       4.150866    0.438861    1.632592 
H       5.226381   -0.840047    1.041622 
H       2.716770   -1.295219    3.667206 
H       1.373198   -1.925453    2.717413 
H       1.812642   -0.198457    2.624976 
H       4.019263   -3.190936    2.692779 
H       4.414376   -3.264918    0.976245 
H       2.779321   -3.681324    1.536424 
H       5.138940   -1.504072   -2.475835 
H       5.243132   -1.954858   -0.776945 
H       4.859319   -0.281268   -1.233685 
H       3.023922   -1.219905   -3.640336 
H       2.723641    0.176451   -2.600885 
H       1.489897   -1.087119   -2.776883 
H       3.560915   -3.436455   -2.752474 
H       1.984937   -3.452979   -1.947027 
H       3.460811   -3.812113   -1.032603 
H      -5.150707   -1.508277   -2.455393 
H      -4.866249   -0.284009   -1.215867 
H      -5.246400   -1.957410   -0.755564 
H      -3.040427   -1.224769   -3.630339 
H      -1.502926   -1.089023   -2.773504 
H      -2.737271    0.173497   -2.594254 
H      -3.573529   -3.440200   -2.736694 
H      -3.463594   -3.813495   -1.016905 
H      -1.993077   -3.454454   -1.940048 
H      -4.005041   -3.187490    2.710969 
H      -2.770922   -3.679037    1.548955 
H      -4.409040   -3.264334    0.996668 
H      -2.696867   -1.293827    3.676154 
H      -1.802777   -0.193116    2.629242 
H      -1.357666   -1.918872    2.716486 
H      -4.814854   -0.744249    2.773518 
H      -5.222011   -0.839949    1.062577 
H      -4.144296    0.440590    1.646034 
H      -0.882961   -4.214050   -0.098388 
H       0.877920   -4.214629   -0.105366 
H       0.003576   -3.911446    1.393875 
H      -0.003711   -1.808990   -1.447745 
H       1.381005    4.978681    0.911176 
H       3.359420    6.458289    0.964326 
H       5.503418    5.700405   -0.031090 
H       5.643068    3.454802   -1.074737 
H       3.683647    1.979207   -1.106758 
H      -1.374030    4.994189    0.874023 
H      -3.350668    6.476057    0.917357 
H      -5.500682    5.706711   -0.056348 
H      -5.647387    3.447100   -1.068467 
H      -3.690061    1.969353   -1.089655 

90
REACTION B. REACTANT, PBE0-D3, conformer c_sym
G_raw (298.15 K) = -2332.664006 Hartree
C      -3.622379    2.895841   -0.661803 
C      -2.412426    3.348099   -0.124038 
C      -2.356868    4.639313    0.413390 
C      -3.482023    5.449534    0.426543 
C      -4.682681    4.989367   -0.106238 
C      -4.745244    3.713677   -0.654296 
C      -1.178891    2.534879   -0.121265 
N      -0.015174    3.177075   -0.111945 
C       1.155108    2.547525   -0.091120 
C       1.156253    1.144267   -0.055818 
N      -0.000663    0.469216   -0.038052 
C      -1.164212    1.131590   -0.084026 
C       2.378793    3.374746   -0.061508 
C       2.303041    4.652623    0.504197 
C       3.418006    5.476209    0.542411 
C       4.627484    5.042718    0.007214 
C       4.710176    3.779710   -0.567160 
C       3.597721    2.948494   -0.599200 
O       2.290719    0.448259   -0.007087 
P       2.267862   -1.265220   -0.004951 
C       3.273725   -1.559901    1.531752 
C       4.487150   -0.637500    1.661325 
Ir      0.009791   -1.641155    0.095001 
P      -2.254342   -1.286795    0.029105 
C      -3.178390   -1.725166   -1.526925 
C      -4.666980   -1.387382   -1.474457 
O      -2.291477    0.423346   -0.061946 
C       3.141472   -1.617751   -1.611538 
C       4.632596   -1.289397   -1.583697 
C       2.457452   -0.760817   -2.684202 
C       2.919472   -3.100453   -1.931925 
C       0.025916   -3.714036    0.340431 
C      -3.207507   -1.499125    1.614855 
C      -3.574656   -2.977054    1.764199 
C      -2.219482   -1.099176    2.720796 
C      -4.442455   -0.602088    1.717709 
C      -2.524416   -0.937210   -2.668770 
C      -2.974182   -3.225611   -1.766832 
C       2.306467   -1.272521    2.689117 
C       3.684423   -3.033912    1.560946 
H       4.924499   -0.791398    2.653244 
H       4.204340    0.413982    1.577909 
H       5.261822   -0.850819    0.926379 
H       2.852665   -1.368708    3.632762 
H       1.478414   -1.986954    2.718600 
H       1.903793   -0.256165    2.645097 
H       4.127408   -3.253695    2.537266 
H       4.431899   -3.269514    0.799999 
H       2.825702   -3.699387    1.429949 
H       5.034557   -1.428952   -2.592218 
H       5.189369   -1.949431   -0.916262 
H       4.819029   -0.253016   -1.292639 
H       2.854140   -1.054499   -3.660678 
H       2.659199    0.303667   -2.547000 
H       1.374848   -0.908895   -2.707123 
H       3.408926   -3.323959   -2.884916 
H       1.856684   -3.332227   -2.031822 
H       3.349087   -3.763840   -1.177560 
H      -5.095711   -1.572534   -2.464489 
H      -4.841931   -0.337690   -1.227116 
H      -5.208383   -2.013962   -0.763448 
H      -2.969407   -1.270732   -3.611072 
H      -1.447541   -1.112071   -2.730565 
H      -2.698035    0.137045   -2.577198 
H      -3.496092   -3.500998   -2.688502 
H      -3.382222   -3.840826   -0.961347 
H      -1.916773   -3.471012   -1.887515 
H      -3.974484   -3.138052    2.770254 
H      -2.703563   -3.628946    1.646019 
H      -4.343438   -3.284023    1.051760 
H      -2.748434   -1.114304    3.679036 
H      -1.829481   -0.086675    2.581167 
H      -1.383736   -1.799042    2.806965 
H      -4.844977   -0.696417    2.731501 
H      -5.232665   -0.887118    1.025382 
H      -4.192338    0.448124    1.552317 
H      -0.871530   -4.219072   -0.025666 
H       0.889228   -4.213912   -0.107553 
H       0.076399   -3.901384    1.426309 
H       0.005080   -1.816736   -1.419439 
H       1.358203    4.989584    0.914892 
H       3.343454    6.460491    0.992386 
H       5.499409    5.687449    0.035821 
H       5.644996    3.436583   -0.997559 
H       3.678858    1.972057   -1.056659 
H      -1.418643    4.997364    0.820997 
H      -3.422419    6.444279    0.855223 
H      -5.563024    5.623131   -0.096395 
H      -5.672824    3.349488   -1.083107 
H      -3.688897    1.909087   -1.098887 

90
REACTION B. REACTANT, M06L-D3, conformer c_sym
G_raw (298.15 K) = -2334.523847 Hartree
C      -3.634573    2.914758   -0.657920 
C      -2.417034    3.357662   -0.123410 
C      -2.358408    4.645630    0.427623 
C      -3.483213    5.456258    0.460614 
C      -4.689923    5.002430   -0.066045 
C      -4.757092    3.733555   -0.630923 
C      -1.185820    2.544494   -0.132677 
N      -0.019301    3.192119   -0.122840 
C       1.155037    2.559253   -0.101266 
C       1.154956    1.153208   -0.060412 
N      -0.003133    0.473265   -0.047996 
C      -1.168903    1.138133   -0.096527 
C       2.375805    3.387608   -0.069508 
C       2.293937    4.675713    0.478205 
C       3.408379    5.500009    0.524264 
C       4.627272    5.060359    0.013895 
C       4.717827    3.790883   -0.546485 
C       3.606123    2.958408   -0.585315 
O       2.291940    0.454853    0.011545 
P       2.275504   -1.266847    0.002083 
C       3.295691   -1.561320    1.535175 
C       4.486360   -0.613162    1.684610 
Ir      0.011191   -1.676749    0.094080 
P      -2.260351   -1.293821    0.023108 
C      -3.198516   -1.711721   -1.535828 
C      -4.684803   -1.371132   -1.464605 
O      -2.297961    0.425047   -0.064130 
C       3.163847   -1.585544   -1.609474 
C       4.651895   -1.249843   -1.560222 
C       2.487591   -0.712311   -2.673554 
C       2.951772   -3.062293   -1.958491 
C       0.025069   -3.764870    0.325789 
C      -3.223836   -1.498177    1.609455 
C      -3.633021   -2.966069    1.741766 
C      -2.225385   -1.137757    2.719251 
C      -4.436623   -0.573496    1.725671 
C      -2.554554   -0.914130   -2.676125 
C      -2.999432   -3.209634   -1.791877 
C       2.324681   -1.329027    2.700844 
C       3.749456   -3.022697    1.530808 
H       4.926691   -0.770507    2.674274 
H       4.186308    0.434702    1.619926 
H       5.270779   -0.794314    0.951153 
H       2.864436   -1.450148    3.644768 
H       1.503737   -2.052222    2.702645 
H       1.905032   -0.318312    2.694795 
H       4.211265   -3.255971    2.494907 
H       4.494329   -3.223811    0.757035 
H       2.912070   -3.714300    1.395105 
H       5.073148   -1.369276   -2.563154 
H       5.208002   -1.913389   -0.895308 
H       4.830733   -0.216986   -1.250986 
H       2.877800   -0.995391   -3.655373 
H       2.697246    0.349876   -2.528466 
H       1.402693   -0.846765   -2.700328 
H       3.453273   -3.277219   -2.906777 
H       1.891182   -3.297320   -2.079040 
H       3.367867   -3.740071   -1.208815 
H      -5.132108   -1.548369   -2.447533 
H      -4.856199   -0.322280   -1.210206 
H      -5.222563   -1.996207   -0.749018 
H      -2.995734   -1.242752   -3.621481 
H      -1.475725   -1.077130   -2.744834 
H      -2.733948    0.159162   -2.582383 
H      -3.532667   -3.485895   -2.706265 
H      -3.391884   -3.834199   -0.985113 
H      -1.944044   -3.457525   -1.930645 
H      -4.038982   -3.135342    2.743541 
H      -2.784376   -3.645582    1.615500 
H      -4.409796   -3.244955    1.025821 
H      -2.747684   -1.147468    3.680798 
H      -1.806389   -0.134615    2.592527 
H      -1.405259   -1.857568    2.798222 
H      -4.845163   -0.670658    2.736412 
H      -5.235419   -0.826314    1.030127 
H      -4.167219    0.474565    1.578827 
H      -0.862457   -4.261930   -0.074903 
H       0.901827   -4.256808   -0.105168 
H       0.043379   -3.961536    1.409925 
H       0.011582   -1.848610   -1.435811 
H       1.341988    5.016996    0.869911 
H       3.326816    6.489694    0.961540 
H       5.499013    5.705076    0.049535 
H       5.658841    3.443666   -0.960407 
H       3.695984    1.979125   -1.036729 
H      -1.415780    4.997039    0.832407 
H      -3.419644    6.445965    0.900953 
H      -5.570225    5.635818   -0.039720 
H      -5.688373    3.375865   -1.057802 
H      -3.705537    1.935970   -1.113722 

90
REACTION B. REACTANT, B3LYP, conformer d_asym
G_raw (298.15 K) = -2334.741212 Hartree
C       2.288434    4.642475   -0.725636 
C       2.380008    3.406147   -0.065870 
C       3.608614    3.038254    0.501190 
C       4.712203    3.882971    0.407557 
C       4.612676    5.101807   -0.259881 
C       3.394643    5.478247   -0.825973 
C       1.160573    2.562849    0.021212 
C       1.161126    1.153943    0.036867 
N       0.000568    0.475270    0.036813 
C      -1.168760    1.138481    0.045692 
C      -1.185738    2.547773    0.046400 
N      -0.016723    3.190675    0.029278 
C      -2.415236    3.379384    0.098712 
C      -2.346510    4.632596    0.728300 
C      -3.459503    5.463903    0.779970 
C      -4.661413    5.065676    0.194659 
C      -4.738430    3.829037   -0.442201 
C      -3.628113    2.989307   -0.487096 
O      -2.304042    0.422483    0.068392 
P      -2.294734   -1.304690   -0.002907 
C      -3.347703   -1.667383    1.533276 
C      -2.428803   -1.497615    2.761278 
Ir      0.017735   -1.669287   -0.030164 
C       0.043172   -3.771577   -0.212500 
O       2.306072    0.452600    0.027217 
P       2.310972   -1.274707    0.053549 
C       3.317699   -1.600025   -1.513730 
C       2.328263   -1.382033   -2.677918 
C       3.240122   -1.595151    1.673051 
C       2.548209   -0.762027    2.772425 
C       3.094971   -3.093426    2.011381 
C       4.727170   -1.206629    1.615816 
C      -3.194482   -1.581002   -1.650357 
C      -2.404072   -0.794939   -2.720768 
C      -3.127194   -3.086105   -1.981701 
C      -4.656746   -1.107902   -1.659570 
C      -3.848378   -3.123670    1.473124 
C      -4.534721   -0.694186    1.680792 
C       4.513227   -0.646588   -1.693927 
C       3.784185   -3.068810   -1.512425 
H      -5.041296   -1.195719   -2.680240 
H      -4.758994   -0.064686   -1.357179 
H      -5.291819   -1.722203   -1.021040 
H      -2.860121   -0.993848   -3.694717 
H      -1.356124   -1.098959   -2.788722 
H      -2.442513    0.282466   -2.553133 
H      -3.560367   -3.239449   -2.974319 
H      -3.695194   -3.695453   -1.278276 
H      -2.101319   -3.454535   -2.002414 
H      -5.031445   -0.914121    2.630587 
H      -5.277159   -0.801850    0.892621 
H      -4.205017    0.344553    1.708297 
H      -3.033106   -1.639803    3.661692 
H      -1.990316   -0.498494    2.813860 
H      -1.626192   -2.235585    2.776468 
H      -4.317830   -3.365074    2.431078 
H      -3.035871   -3.837668    1.319118 
H      -4.599300   -3.273322    0.696217 
H       5.152299   -1.327484    2.616660 
H       4.871424   -0.166196    1.320724 
H       5.298448   -1.845697    0.942208 
H       3.010229   -1.013181    3.731189 
H       1.482131   -0.981278    2.851472 
H       2.673112    0.310010    2.614004 
H       3.585806   -3.277313    2.971353 
H       3.569041   -3.740941    1.272264 
H       2.048728   -3.386489    2.106653 
H       4.231142   -3.291051   -2.485717 
H       2.955694   -3.765915   -1.365439 
H       4.543324   -3.261822   -0.753005 
H       2.856865   -1.545897   -3.621472 
H       1.932126   -0.364242   -2.698479 
H       1.496864   -2.088785   -2.642397 
H       4.945622   -0.830408   -2.682358 
H       5.299094   -0.808676   -0.958626 
H       4.207099    0.399239   -1.651978 
H       0.919965   -4.242983    0.236185 
H      -0.839111   -4.262088    0.205275 
H       0.066089   -4.006424   -1.287442 
H       0.008895   -1.775937    1.496451 
H      -1.411549    4.944913    1.175215 
H      -3.388990    6.424012    1.278190 
H      -5.528716    5.714636    0.233074 
H      -5.664185    3.514883   -0.910455 
H      -3.704443    2.038966   -0.994266 
H       3.702973    2.100936    1.029149 
H       5.651133    3.586204    0.860623 
H       5.475298    5.753465   -0.337746 
H       3.306616    6.423791   -1.348704 
H       1.341656    4.936626   -1.159847 

90
REACTION B. REACTANT, PBE-D2, conformer d_asym
G_raw (298.15 K) = -2332.557870 Hartree
C      -3.642587    2.943991   -0.618346 
C      -2.418342    3.400373   -0.086190 
C      -2.355686    4.709373    0.437199 
C      -3.484909    5.530266    0.443814 
C      -4.698475    5.065613   -0.083006 
C      -4.768846    3.773726   -0.618499 
C      -1.183478    2.579888   -0.080890 
N      -0.007568    3.227554   -0.075247 
C       1.170897    2.585454   -0.056730 
C       1.170331    1.170404   -0.020767 
N      -0.001051    0.485985   -0.013695 
C      -1.175444    1.164175   -0.046978 
C       2.402215    3.410774   -0.039650 
C       2.333515    4.708380    0.509854 
C       3.459604    5.533598    0.532429 
C       4.674734    5.084318   -0.004004 
C       4.751019    3.803063   -0.563968 
C       3.628185    2.969005   -0.579200 
O       2.316820    0.469839    0.045057 
P       2.258400   -1.276253    0.001651 
C       3.252367   -1.647547    1.536354 
C       4.500350   -0.766296    1.696882 
Ir      0.006222   -1.639671    0.076676 
P      -2.251327   -1.289827    0.022276 
C      -3.172462   -1.691310   -1.549232 
C      -4.671523   -1.373809   -1.477336 
O      -2.318102    0.456260   -0.011487 
C       3.125719   -1.608002   -1.618006 
C       4.633164   -1.328349   -1.577019 
C       2.455370   -0.698317   -2.665862 
C       2.845564   -3.082433   -1.967576 
C       0.017670   -3.737016    0.283159 
C      -3.198644   -1.590101    1.604130 
C      -3.566034   -3.083281    1.650492 
C      -2.183055   -1.268808    2.720851 
C      -4.435747   -0.694806    1.769751 
C      -2.516978   -0.858305   -2.667431 
C      -2.936681   -3.189663   -1.822173 
C       2.283453   -1.372026    2.706089 
C       3.613277   -3.142974    1.493625 
H       4.938477   -0.979536    2.686624 
H       4.242056    0.302231    1.658079 
H       5.263297   -0.976943    0.937458 
H       2.823547   -1.550631    3.650839 
H       1.408750   -2.043290    2.689127 
H       1.937081   -0.326164    2.707587 
H       4.063889   -3.417894    2.461650 
H       4.347299   -3.364131    0.703635 
H       2.721523   -3.773413    1.342734 
H       5.035411   -1.457640   -2.595567 
H       5.161403   -2.030042   -0.915263 
H       4.847049   -0.298638   -1.252578 
H       2.833086   -0.988051   -3.659927 
H       2.698838    0.361479   -2.498830 
H       1.359567   -0.813255   -2.668410 
H       3.319059   -3.299414   -2.939319 
H       1.764228   -3.270003   -2.052542 
H       3.265792   -3.774875   -1.222578 
H      -5.108417   -1.543431   -2.475538 
H      -4.851901   -0.324587   -1.198109 
H      -5.194508   -2.029494   -0.766148 
H      -2.944508   -1.184397   -3.629575 
H      -1.426967   -1.012560   -2.707316 
H      -2.718085    0.216349   -2.545113 
H      -3.437193   -3.447019   -2.770238 
H      -3.357456   -3.829096   -1.031741 
H      -1.863196   -3.411742   -1.919306 
H      -3.972510   -3.308426    2.650452 
H      -2.683427   -3.724752    1.491541 
H      -4.335773   -3.339617    0.906907 
H      -2.689427   -1.379419    3.694185 
H      -1.808784   -0.234900    2.649704 
H      -1.328283   -1.965944    2.708108 
H      -4.840172   -0.863062    2.782276 
H      -5.225686   -0.932524    1.046599 
H      -4.174340    0.369507    1.676002 
H      -0.885522   -4.227825   -0.112188 
H       0.892787   -4.224180   -0.176111 
H       0.057843   -3.955843    1.372225 
H       0.005132   -1.809530   -1.451728 
H       1.382781    5.055048    0.919185 
H       3.390112    6.531678    0.971107 
H       5.555409    5.730364    0.012393 
H       5.689469    3.448264   -0.996240 
H       3.704040    1.978188   -1.025482 
H      -1.406022    5.068733    0.837600 
H      -3.419024    6.537114    0.862581 
H      -5.582036    5.707906   -0.078357 
H      -5.705816    3.406589   -1.043647 
H      -3.714758    1.944986   -1.046271 


90
REACTION B. TS, PBE, conformer a_sym
G_raw (298.15 K) =  -2332.395478 Hartree
C      -3.598176    3.000140   -0.809692 
C      -2.407353    3.371894   -0.155603 
C      -2.369742    4.602078    0.532549 
C      -3.496261    5.425163    0.582170 
C      -4.677925    5.043409   -0.066870 
C      -4.721076    3.832487   -0.767587 
C      -1.173878    2.547008   -0.197957 
C      -1.176435    1.131415   -0.197922 
N      -0.001332    0.433163   -0.185792 
C       1.174041    1.130104   -0.203813 
C       1.172093    2.545081   -0.202969 
N       0.000061    3.196695   -0.183256 
O       2.327318    0.446770   -0.170154 
P       2.274525   -1.288062    0.049118 
C       3.173285   -1.427297    1.713898 
C       2.382097   -0.527588    2.687434 
Ir     -0.000600   -1.617519    0.016628 
P      -2.275646   -1.289793    0.044602 
C      -3.270338   -1.776697   -1.498478 
C      -2.353060   -1.418889   -2.689429 
O      -2.329255    0.447561   -0.157941 
C       2.408671    3.365262   -0.162994 
C       2.393383    4.570638    0.567721 
C       3.524036    5.388560    0.614543 
C       4.685736    5.025906   -0.079806 
C       4.705976    3.839214   -0.821998 
C       3.579413    3.011744   -0.861325 
C       0.001706   -3.831428    0.014062 
C      -3.186708   -1.440203    1.702093 
C      -2.378453   -0.579450    2.696547 
C      -3.124843   -2.915602    2.144759 
C      -4.642134   -0.947038    1.660340 
C       3.280915   -1.788075   -1.480903 
C       2.358708   -1.473090   -2.679946 
C       4.602678   -1.018800   -1.645938 
C       3.542881   -3.304903   -1.415549 
C      -3.500399   -3.299732   -1.467123 
C      -4.607614   -1.032447   -1.650612 
C       3.070803   -2.892640    2.182287 
C       4.641028   -0.973539    1.671331 
H      -5.001643   -1.241437   -2.658926 
H      -4.489568    0.055911   -1.558517 
H      -5.361509   -1.365026   -0.927132 
H      -2.852294   -1.739175   -3.618704 
H      -1.380262   -1.931104   -2.630310 
H      -2.176702   -0.335149   -2.762418 
H      -3.957186   -3.600395   -2.424129 
H      -4.189624   -3.601852   -0.665767 
H      -2.560623   -3.862235   -1.360449 
H      -5.017758   -0.899281    2.695873 
H      -5.298343   -1.632448    1.107252 
H      -4.726678    0.060373    1.227743 
H      -2.794623   -0.737668    3.704734 
H      -2.453417    0.493009    2.466080 
H      -1.315843   -0.866481    2.712152 
H      -3.605794   -2.998757    3.132865 
H      -2.088123   -3.267100    2.251366 
H      -3.658812   -3.591030    1.461213 
H       5.016223   -0.928337    2.707150 
H       4.752743    0.028258    1.232045 
H       5.279810   -1.680170    1.124309 
H       2.778375   -0.688109    3.703244 
H       1.309599   -0.776947    2.691572 
H       2.498122    0.538563    2.445213 
H       3.555409   -2.973167    3.168786 
H       3.579478   -3.595858    1.507337 
H       2.024356   -3.209899    2.300320 
H       4.006946   -3.617574   -2.365181 
H       2.615653   -3.885665   -1.296586 
H       4.237877   -3.573239   -0.607057 
H       2.865279   -1.801130   -3.602495 
H       2.160809   -0.394608   -2.774065 
H       1.395955   -2.002776   -2.610883 
H       5.006609   -1.245599   -2.646456 
H       5.359710   -1.314967   -0.910188 
H       4.459458    0.068556   -1.583214 
H       0.890719   -4.360407    0.379425 
H      -0.894809   -4.358292    0.363306 
H       0.012380   -3.839537   -1.089158 
H      -0.000394   -2.825602    1.076912 
H       1.484182    4.853591    1.101150 
H       3.498902    6.313329    1.195376 
H       5.569278    5.667074   -0.044958 
H       5.601532    3.556421   -1.379800 
H       3.602128    2.100899   -1.459556 
H      -1.444863    4.900972    1.028638 
H      -3.452304    6.369228    1.129905 
H      -5.558582    5.688394   -0.029474 
H      -5.632187    3.533733   -1.290815 
H      -3.640528    2.069746   -1.375141 

90
REACTION B. TS, M11L, conformer c_sym
G_raw (298.15 K) =  -2334.468888 Hartree
N       0.000123    3.126226    0.202928 
C      -1.150430    2.484631    0.204639 
C      -1.145487    1.088920    0.178068 
N       0.000033    0.408382    0.150798 
C       1.145597    1.088851    0.177938 
C       1.150633    2.484560    0.204517 
C      -2.375382    3.289265    0.158151 
C      -2.314459    4.538741   -0.453289 
C      -3.431946    5.341006   -0.526486 
C      -4.631407    4.915727    0.014811 
C      -4.699275    3.685250    0.639744 
C      -3.584145    2.875142    0.709964 
O      -2.264245    0.412732    0.137263 
P      -2.253237   -1.258181   -0.006429 
C      -3.181443   -1.707527    1.528652 
C      -2.456070   -1.007340    2.666784 
Ir     -0.000046   -1.633353   -0.079358 
C      -0.000196   -3.706552   -0.653314 
O       2.264310    0.412600    0.136991 
P       2.253164   -1.258345   -0.006279 
C       3.222679   -1.375364   -1.580730 
C       2.227947   -0.992040   -2.667716 
C       2.375641    3.289102    0.157892 
C       3.181046   -1.707307    1.529105 
C       2.455606   -1.006414    2.666770 
C       3.063131   -3.209761    1.719519 
C       4.633759   -1.284529    1.523777 
C      -3.222550   -1.374728   -1.581058 
C      -2.227558   -0.991529   -2.667845 
C      -3.663522   -2.810430   -1.786701 
C      -4.406564   -0.428842   -1.656631 
C      -3.063890   -3.210088    1.718470 
C      -4.634052   -1.284389    1.523208 
C       4.406976   -0.429841   -1.656267 
C       3.663265   -2.811230   -1.786076 
H      -4.805912   -0.464031   -2.681182 
H      -4.124578    0.613016   -1.452834 
H      -5.226271   -0.704570   -0.986103 
H      -2.737772   -1.008998   -3.642004 
H      -1.378545   -1.687412   -2.720522 
H      -1.830662    0.026246   -2.531467 
H      -4.067894   -2.920227   -2.803626 
H      -4.456582   -3.111175   -1.090161 
H      -2.830590   -3.523378   -1.695314 
H      -5.052332   -1.443030    2.528686 
H      -5.243326   -1.873561    0.826273 
H      -4.761071   -0.219764    1.282867 
H      -2.866213   -1.368431    3.621328 
H      -2.595314    0.082073    2.642427 
H      -1.376604   -1.218916    2.667856 
H      -3.589967   -3.492866    2.641737 
H      -2.018009   -3.528062    1.828644 
H      -3.513453   -3.789591    0.901132 
H       5.051755   -1.442734    2.529441 
H       4.761091   -0.220064    1.282900 
H       5.243049   -1.874226    0.827293 
H       2.864913   -1.367683    3.621607 
H       1.375963   -1.217099    2.667260 
H       2.595735    0.082882    2.642312 
H       3.589006   -3.492281    2.642977 
H       3.512720   -3.789660    0.902476 
H       2.017175   -3.527505    1.829633 
H       4.067710   -2.921327   -2.802940 
H       2.830128   -3.523929   -1.694648 
H       4.456173   -3.112067   -1.089397 
H       2.738309   -1.009760   -3.641795 
H       1.831292    0.025846   -2.531512 
H       1.378765   -1.687716   -2.720440 
H       4.806473   -0.465307   -2.680751 
H       5.226495   -0.705713   -0.985572 
H       4.125256    0.612132   -1.452681 
H       0.884032   -4.320108   -0.434719 
H      -0.884940   -4.319559   -0.435315 
H       0.000274   -3.493498   -1.737399 
H      -0.000064   -3.014787    0.686850 
H      -1.367316    4.869708   -0.879997 
H      -3.369030    6.311876   -1.019717 
H      -5.517004    5.549385   -0.048091 
H      -5.635517    3.349980    1.087553 
H      -3.653189    1.920672    1.229689 
C       2.314771    4.538560   -0.453591 
C       3.432327    5.340718   -0.526927 
C       4.631801    4.915353    0.014272 
C       4.699616    3.684897    0.639254 
C       3.584418    2.874897    0.709609 
H       1.367617    4.869600   -0.880217 
H       3.369456    6.311574   -1.020194 
H       5.517451    5.548925   -0.048743 
H       5.635868    3.349559    1.086990 
H       3.653424    1.920441    1.229365 

90
REACTION B. TS, B3LYP, conformer c_sym
G_raw (298.15 K) =  -2334.722355 Hartree
N       0.000017    3.178137    0.149660 
C      -1.170627    2.538816    0.162631 
C      -1.167446    1.130645    0.144171 
N       0.000124    0.446608    0.109713 
C       1.167466    1.130832    0.140402 
C       1.170203    2.538694    0.154666 
C      -2.403217    3.367812    0.143585 
C      -2.367608    4.604036   -0.520183 
C      -3.487194    5.427672   -0.548943 
C      -4.661110    5.038929    0.096239 
C      -4.703643    3.820175    0.769975 
C      -3.587237    2.987540    0.791500 
O      -2.310295    0.438486    0.133501 
P      -2.295494   -1.283288   -0.018856 
C      -3.233033   -1.775529    1.549736 
C      -2.483085   -1.118776    2.728497 
Ir      0.000587   -1.628949   -0.080885 
C       0.003350   -3.767175   -0.658205 
O       2.311018    0.439930    0.129887 
P       2.296131   -1.283001   -0.004069 
C       3.308026   -1.444352   -1.598224 
C       2.355493   -1.017072   -2.736400 
C       2.403661    3.365922    0.121949 
C       3.219350   -1.760085    1.577628 
C       2.468805   -1.077704    2.741540 
C       3.110424   -3.290885    1.745478 
C       4.695935   -1.332245    1.603829 
C      -3.296791   -1.427226   -1.622452 
C      -2.335003   -0.997898   -2.751931 
C      -3.711392   -2.896348   -1.831238 
C      -4.535167   -0.511600   -1.667099 
C      -3.139880   -3.309440    1.696789 
C      -4.705460   -1.333496    1.572126 
C       4.552252   -0.536812   -1.641134 
C       3.714180   -2.917774   -1.793174 
H      -4.958011   -0.567965   -2.674847 
H      -4.278084    0.530048   -1.471665 
H      -5.313555   -0.816173   -0.970449 
H      -2.865546   -1.075080   -3.705578 
H      -1.449671   -1.632987   -2.805043 
H      -2.012645    0.039842   -2.639239 
H      -4.159430   -2.990840   -2.824688 
H      -4.458228   -3.220611   -1.105122 
H      -2.862130   -3.582046   -1.790601 
H      -5.106474   -1.527030    2.571638 
H      -5.316123   -1.895324    0.864550 
H      -4.822982   -0.267715    1.369773 
H      -2.927491   -1.478430    3.660934 
H      -2.570879   -0.031163    2.715299 
H      -1.424162   -1.384264    2.732570 
H      -3.646873   -3.595987    2.622592 
H      -2.104361   -3.646697    1.768644 
H      -3.624914   -3.845630    0.879699 
H       5.088475   -1.516726    2.608442 
H       4.825062   -0.270337    1.388543 
H       5.305679   -1.908970    0.907515 
H       2.893476   -1.438608    3.682613 
H       1.403971   -1.318396    2.735175 
H       2.580944    0.007465    2.720144 
H       3.613426   -3.570263    2.675622 
H       3.591127   -3.842631    0.936051 
H       2.071563   -3.617082    1.819932 
H       4.171611   -3.022132   -2.781340 
H       2.859394   -3.596795   -1.756604 
H       4.451169   -3.242948   -1.057338 
H       2.889370   -1.108323   -3.686923 
H       2.042437    0.024595   -2.634375 
H       1.464508   -1.644456   -2.786638 
H       4.979488   -0.600171   -2.646606 
H       5.325280   -0.843540   -0.939525 
H       4.300909    0.507316   -1.451381 
H       0.884971   -4.362012   -0.425883 
H      -0.884008   -4.358533   -0.439712 
H       0.012107   -3.522997   -1.723758 
H      -0.001337   -3.043833    0.648062 
H      -1.454745    4.910590   -1.014006 
H      -3.443528    6.374084   -1.075648 
H      -5.533601    5.681716    0.075663 
H      -5.607052    3.514801    1.285242 
H      -3.635871    2.050690    1.327296 
C       2.372703    4.586221   -0.570454 
C       3.493210    5.408323   -0.611000 
C       4.662579    5.033619    0.050509 
C       4.700608    3.829912    0.751156 
C       3.583503    2.998666    0.784428 
H       1.463733    4.881031   -1.078749 
H       3.453815    6.342402   -1.159591 
H       5.535516    5.675460    0.021159 
H       5.600835    3.535621    1.278308 
H       3.628146    2.073469    1.340734 

90
REACTION B. TS, M06L_D3, conformer c_sym
G_raw (298.15 K) =  -2334.510804 Hartree
N      -0.002137    3.174201    0.190235 
C      -1.169858    2.530210    0.191242 
C      -1.166366    1.124841    0.163414 
N      -0.001468    0.437652    0.133351 
C       1.162918    1.125133    0.168869 
C       1.165447    2.530432    0.195209 
C      -2.399441    3.344834    0.148407 
C      -2.336427    4.609860   -0.453091 
C      -3.460848    5.418709   -0.523834 
C      -4.670060    4.986219    0.014859 
C      -4.740348    3.741666    0.631705 
C      -3.618501    2.924429    0.696791 
O      -2.302721    0.435949    0.124130 
P      -2.265209   -1.280738   -0.004814 
C      -3.196878   -1.733318    1.547225 
C      -2.475886   -1.015760    2.695338 
Ir      0.000124   -1.637079   -0.073244 
C       0.000401   -3.747877   -0.646747 
O       2.299975    0.437206    0.136175 
P       2.265325   -1.278473   -0.007300 
C       3.242871   -1.410717   -1.595756 
C       2.247331   -1.028957   -2.700119 
C       2.395391    3.344346    0.154112 
C       3.204406   -1.742389    1.536709 
C       2.478609   -1.048901    2.696306 
C       3.083416   -3.260631    1.710166 
C       4.670534   -1.320214    1.518206 
C      -3.245387   -1.428448   -1.589745 
C      -2.256123   -1.040256   -2.697625 
C      -3.672227   -2.886392   -1.765164 
C      -4.456131   -0.496204   -1.665422 
C      -3.059976   -3.247790    1.740471 
C      -4.667624   -1.327803    1.527164 
C       4.443074   -0.464592   -1.670392 
C       3.685732   -2.862855   -1.778371 
H      -4.871636   -0.559408   -2.676120 
H      -4.184194    0.546060   -1.486087 
H      -5.251151   -0.770709   -0.973255 
H      -2.763156   -1.102406   -3.665364 
H      -1.388403   -1.704860   -2.727027 
H      -1.896144   -0.012694   -2.583293 
H      -4.112045   -3.012472   -2.758901 
H      -4.428452   -3.185761   -1.035432 
H      -2.828585   -3.579217   -1.694918 
H      -5.097199   -1.510840    2.517104 
H      -5.249438   -1.911882    0.810892 
H      -4.802243   -0.266851    1.301844 
H      -2.898858   -1.357647    3.644391 
H      -2.602601    0.068393    2.647000 
H      -1.404401   -1.238058    2.704879 
H      -3.571028   -3.532468    2.664902 
H      -2.013410   -3.549546    1.835544 
H      -3.511367   -3.824273    0.929317 
H       5.104270   -1.509166    2.505234 
H       4.792843   -0.255338    1.304336 
H       5.257269   -1.889852    0.794387 
H       2.915291   -1.391332    3.639005 
H       1.412108   -1.292967    2.711348 
H       2.583914    0.037933    2.657242 
H       3.599300   -3.552239    2.629720 
H       3.538090   -3.822524    0.890703 
H       2.039977   -3.573485    1.804143 
H       4.121942   -2.980364   -2.774768 
H       2.850816   -3.566020   -1.706202 
H       4.449078   -3.155589   -1.053493 
H       2.754001   -1.078401   -3.668807 
H       1.873772   -0.006932   -2.579517 
H       1.388497   -1.704858   -2.732811 
H       4.859730   -0.522741   -2.680926 
H       5.240951   -0.729716   -0.977773 
H       4.158704    0.574264   -1.490508 
H       0.889452   -4.344094   -0.438082 
H      -0.877718   -4.353844   -0.420037 
H      -0.012953   -3.505355   -1.716062 
H       0.000730   -3.055220    0.669218 
H      -1.391419    4.944148   -0.867611 
H      -3.395228    6.389533   -1.004181 
H      -5.550239    5.617864   -0.042286 
H      -5.673636    3.402533    1.069302 
H      -3.690372    1.966332    1.195107 
C       2.337719    4.603083   -0.460761 
C       3.463097    5.410814   -0.529986 
C       4.667393    4.983189    0.023384 
C       4.732133    3.744703    0.653052 
C       3.609378    2.928637    0.716879 
H       1.396568    4.932957   -0.887680 
H       3.402199    6.376739   -1.020765 
H       5.548272    5.613964   -0.032530 
H       5.661609    3.409796    1.101939 
H       3.675801    1.975620    1.225859 

90
REACTION B. TS, M06L, conformer c_sym
G_raw (298.15 K) =  -2334.497593 Hartree
N      -0.001983    3.173809    0.184261 
C      -1.169891    2.530395    0.184879 
C      -1.166443    1.124854    0.158592 
N      -0.001306    0.437818    0.129639 
C       1.163380    1.125197    0.164138 
C       1.165990    2.530736    0.189870 
C      -2.398597    3.346830    0.142281 
C      -2.333395    4.612510   -0.457862 
C      -3.455715    5.424511   -0.525978 
C      -4.665226    4.994731    0.014113 
C      -4.737940    3.749349    0.628964 
C      -3.618237    2.928826    0.691241 
O      -2.303042    0.435916    0.120700 
P      -2.265854   -1.281373   -0.003179 
C      -3.199201   -1.730657    1.549474 
C      -2.480085   -1.010564    2.697117 
Ir      0.000095   -1.637867   -0.071120 
C       0.000091   -3.750539   -0.638871 
O       2.300494    0.436930    0.132138 
P       2.265914   -1.279287   -0.007699 
C       3.242405   -1.416860   -1.596834 
C       2.246671   -1.039020   -2.702304 
C       2.394764    3.347109    0.151226 
C       3.208469   -1.741370    1.535466 
C       2.485923   -1.046391    2.696123 
C       3.088220   -3.259413    1.711642 
C       4.674821   -1.320005    1.513519 
C      -3.246642   -1.435517   -1.587525 
C      -2.258063   -1.052570   -2.697800 
C      -3.674626   -2.893925   -1.756859 
C      -4.457384   -0.503533   -1.666859 
C      -3.062920   -3.244713    1.746780 
C      -4.670158   -1.325833    1.527279 
C       4.442925   -0.471460   -1.675756 
C       3.685575   -2.869540   -1.775087 
H      -4.872478   -0.570477   -2.677527 
H      -4.185672    0.539378   -1.491098 
H      -5.252723   -0.775791   -0.974198 
H      -2.765675   -1.120045   -3.664938 
H      -1.390018   -1.716896   -2.724224 
H      -1.898489   -0.024276   -2.588991 
H      -4.115189   -3.023288   -2.749876 
H      -4.430799   -3.189810   -1.025691 
H      -2.831746   -3.587425   -1.684495 
H      -5.100318   -1.507340    2.517280 
H      -5.251189   -1.911747    0.811893 
H      -4.805267   -0.265419    1.299866 
H      -2.904627   -1.350599    3.646197 
H      -2.606968    0.073467    2.646423 
H      -1.408611   -1.232740    2.708958 
H      -3.574197   -3.526270    2.672099 
H      -2.016660   -3.547149    1.842797 
H      -3.514789   -3.823267    0.937431 
H       5.110201   -1.508296    2.499983 
H       4.797531   -0.255474    1.298325 
H       5.259923   -1.890981    0.789463 
H       2.925310   -1.387813    3.638000 
H       1.419499   -1.290494    2.714505 
H       2.591290    0.040396    2.655569 
H       3.605556   -3.548866    2.631113 
H       3.542228   -3.822621    0.892767 
H       2.045199   -3.572941    1.807692 
H       4.120721   -2.989864   -2.771648 
H       2.851286   -3.573090   -1.699767 
H       4.450020   -3.159574   -1.050325 
H       2.753133   -1.092772   -3.670930 
H       1.873695   -0.016320   -2.585811 
H       1.387433   -1.714546   -2.732056 
H       4.858526   -0.533428   -2.686542 
H       5.241477   -0.734658   -0.983221 
H       4.159330    0.568164   -1.499257 
H       0.889128   -4.346248   -0.428437 
H      -0.878132   -4.355679   -0.410124 
H      -0.013284   -3.511621   -1.709023 
H       0.000854   -3.053755    0.675538 
H      -1.388259    4.945106   -0.873410 
H      -3.388180    6.395786   -1.005145 
H      -5.543716    5.628942   -0.040513 
H      -5.671602    3.412428    1.067501 
H      -3.692272    1.970127    1.188084 
C       2.332962    4.610193   -0.454612 
C       3.455792    5.421760   -0.519802 
C       4.662134    4.993985    0.028889 
C       4.731246    3.751209    0.649481 
C       3.611044    2.931157    0.709028 
H       1.390251    4.940918   -0.877218 
H       3.391208    6.391014   -1.003482 
H       5.541035    5.627804   -0.023534 
H       5.662387    3.416166    1.094810 
H       3.681503    1.974712    1.210892 

90
REACTION B. TS, PBE-D3BJ, conformer b_sym
G_raw (298.15 K) =  -2332.544430 Hartree
C      -2.345926    4.658283   -0.563242 
C      -2.403765    3.372684    0.013143 
C      -3.615305    2.945783    0.592917 
C      -4.735751    3.781498    0.587209 
C      -4.671329    5.049592   -0.000887 
C      -3.469571    5.485220   -0.574315 
C      -1.171158    2.549780    0.003496 
C      -1.170329    1.136123   -0.018206 
N       0.003897    0.439565   -0.065796 
C       1.178688    1.136348   -0.091727 
C       1.174204    2.550037   -0.083095 
N       0.002120    3.199527   -0.033160 
C       2.407359    3.370238   -0.065902 
O       2.330027    0.450645   -0.090838 
P       2.266860   -1.289526    0.066735 
C       3.077829   -1.494010    1.754017 
C       2.917226   -2.969964    2.164717 
Ir      0.002772   -1.614076   -0.052558 
C       0.012165   -3.806990   -0.318721 
O      -2.318513    0.449091   -0.000708 
P      -2.260777   -1.295582   -0.034100 
C      -3.234949   -1.550460   -1.628140 
C      -3.602374   -3.039617   -1.743040 
C      -3.191974   -1.674043    1.556696 
C      -3.070380   -3.188060    1.816524 
C      -4.665429   -1.247963    1.525834 
C      -2.442571   -0.908680    2.666029 
C       3.331862   -1.735473   -1.421224 
C       4.645241   -0.945070   -1.515055 
C       3.609026   -3.248066   -1.368407 
C       2.448425   -1.405508   -2.642931 
C       4.550851   -1.067815    1.790568 
C       2.250291   -0.609840    2.709437 
C      -4.485091   -0.662466   -1.736778 
C      -2.244714   -1.165217   -2.747113 
H      -4.883360   -0.760333   -2.759904 
H      -4.247791    0.396940   -1.567116 
H      -5.279081   -0.962299   -1.043053 
H      -2.733855   -1.331261   -3.720468 
H      -1.327708   -1.772017   -2.710288 
H      -1.961409   -0.103170   -2.691099 
H      -4.045838   -3.213949   -2.736462 
H      -4.345596   -3.341360   -0.991401 
H      -2.722601   -3.695204   -1.656687 
H      -5.083110   -1.367505    2.538609 
H      -5.262807   -1.873131    0.847952 
H      -4.785567   -0.194273    1.236306 
H      -2.853774   -1.218585    3.639853 
H      -2.571994    0.178794    2.572883 
H      -1.365487   -1.136441    2.654245 
H      -3.580344   -3.415372    2.766188 
H      -2.020941   -3.499429    1.918737 
H      -3.544011   -3.795761    1.032819 
H       4.882424   -1.057794    2.841532 
H       4.696676   -0.056776    1.383797 
H       5.198637   -1.770326    1.249210 
H       2.574948   -0.818609    3.741142 
H       1.174175   -0.831481    2.631425 
H       2.407860    0.460256    2.513397 
H       3.352339   -3.098580    3.168710 
H       3.436242   -3.662121    1.486474 
H       1.856858   -3.257371    2.219466 
H       4.105424   -3.544526   -2.306155 
H       2.684743   -3.838465   -1.283100 
H       4.279897   -3.514940   -0.539715 
H       2.996637   -1.686221   -3.556581 
H       2.220147   -0.330774   -2.702452 
H       1.499609   -1.961732   -2.623968 
H       5.087805   -1.133789   -2.506633 
H       5.377976   -1.254440   -0.761182 
H       4.482605    0.136741   -1.421743 
H       0.851640   -4.403717    0.060093 
H      -0.924363   -4.341301   -0.125394 
H       0.139855   -3.677242   -1.407350 
H      -0.013373   -2.946273    0.849753 
H      -1.404815    4.992194   -1.002793 
H      -3.408933    6.473380   -1.035311 
H      -5.551277    5.696144   -0.010694 
H      -5.663679    3.437924    1.049339 
H      -3.680751    1.966598    1.063948 
C       3.589917    2.984163   -0.725016 
C       4.717062    3.809968   -0.698864 
C       4.684355    5.028216   -0.010565 
C       3.509392    5.424060    0.641915 
C       2.378738    4.606533    0.610078 
H       3.620609    2.047945   -1.280196 
H       5.623053    3.500500   -1.224238 
H       5.568790    5.668190    0.014934 
H       3.475056    6.373878    1.179752 
H       1.457473    4.910294    1.109794 

90
REACTION B. TS, PBE0, conformer a_sym
G_raw (298.15 K) =  -2332.559620 Hartree
C      -3.555301    2.992267   -0.850161 
C      -2.395209    3.340521   -0.153806 
C      -2.378702    4.530861    0.580156 
C      -3.502193    5.342959    0.631579 
C      -4.655313    4.986279   -0.060759 
C      -4.675262    3.812832   -0.805879 
C      -1.164881    2.522957   -0.201032 
C      -1.165265    1.119606   -0.203439 
N      -0.002338    0.436255   -0.199357 
C       1.160832    1.118704   -0.216453 
C       1.161129    2.521688   -0.213474 
N      -0.001321    3.163502   -0.189976 
O       2.298827    0.433881   -0.190635 
P       2.263225   -1.265772    0.051203 
C       3.129277   -1.382634    1.705068 
C       2.344136   -0.463574    2.650479 
Ir     -0.001335   -1.610279    0.009092 
P      -2.265473   -1.269155    0.040520 
C      -3.261211   -1.755656   -1.468459 
C      -2.350713   -1.434343   -2.662799 
O      -2.303207    0.435534   -0.164519 
C       2.393562    3.336438   -0.176911 
C       2.395094    4.513130    0.578524 
C       3.522077    5.321000    0.621879 
C       4.659811    4.973320   -0.099831 
C       4.661152    3.813563   -0.866477 
C       3.537873    2.997157   -0.902864 
C       0.003820   -3.789943   -0.039925 
C      -3.150486   -1.422339    1.681027 
C      -2.368205   -0.534461    2.657887 
C      -3.045976   -2.879970    2.142442 
C      -4.610747   -0.974928    1.647445 
C       3.283543   -1.785121   -1.428834 
C       2.373820   -1.544531   -2.642150 
C       4.574784   -0.986861   -1.615663 
C       3.594289   -3.279756   -1.308050 
C      -3.521956   -3.263556   -1.418403 
C      -4.576847   -0.993340   -1.631667 
C       3.010362   -2.827306    2.202831 
C       4.592869   -0.946721    1.674933 
H      -4.972492   -1.210145   -2.629417 
H      -4.438287    0.086515   -1.557824 
H      -5.331500   -1.296702   -0.907632 
H      -2.861474   -1.745303   -3.579905 
H      -1.397812   -1.967385   -2.607713 
H      -2.147709   -0.362971   -2.744991 
H      -3.975410   -3.567065   -2.367433 
H      -4.218746   -3.535838   -0.622595 
H      -2.601228   -3.840474   -1.296505 
H      -4.978040   -0.929343    2.678037 
H      -5.245431   -1.680087    1.108503 
H      -4.726969    0.019135    1.209255 
H      -2.767984   -0.697110    3.663827 
H      -2.479351    0.526261    2.421383 
H      -1.303911   -0.786272    2.667597 
H      -3.528997   -2.964800    3.121003 
H      -2.005352   -3.191906    2.259356 
H      -3.547566   -3.577920    1.468468 
H       4.954322   -0.889910    2.707057 
H       4.718699    0.040499    1.224111 
H       5.225658   -1.663723    1.149281 
H       2.728350   -0.606632    3.665418 
H       1.276549   -0.701949    2.651973 
H       2.471432    0.589926    2.390635 
H       3.474938   -2.887722    3.192055 
H       3.522214   -3.543992    1.556826 
H       1.966577   -3.132788    2.308141 
H       4.059276   -3.612774   -2.241414 
H       2.694365   -3.882452   -1.158020 
H       4.298317   -3.489693   -0.499693 
H       2.905403   -1.866447   -3.543527 
H       2.129853   -0.485379   -2.763203 
H       1.441976   -2.111875   -2.575999 
H       4.994346   -1.246327   -2.593248 
H       5.327636   -1.219735   -0.864322 
H       4.395071    0.089254   -1.607015 
H       0.891883   -4.315429    0.312016 
H      -0.875739   -4.325197    0.319315 
H      -0.002105   -3.808490   -1.136146 
H      -0.005103   -2.799832    1.055671 
H       1.504044    4.784940    1.133023 
H       3.512432    6.225516    1.220696 
H       5.540148    5.606361   -0.067819 
H       5.538403    3.543733   -1.444763 
H       3.542927    2.106623   -1.518458 
H      -1.475656    4.810394    1.110722 
H      -3.477670    6.258131    1.213546 
H      -5.532968    5.622695   -0.022608 
H      -5.564707    3.535166   -1.361396 
H      -3.576379    2.090806   -1.448902 

90
REACTION B. TS, B3LYP-D3, conformer c_sym
G_raw (298.15 K) = -2334.859888 Hartree
N      -0.003568    3.182396    0.176835 
C      -1.172908    2.539589    0.178878 
C      -1.167909    1.133249    0.147857 
N      -0.000788    0.449282    0.112925 
C       1.164753    1.135423    0.145420 
C       1.166420    2.541636    0.172534 
C      -2.413373    3.352516    0.152470 
C      -2.377686    4.609467   -0.471130 
C      -3.513407    5.409856   -0.519626 
C      -4.704159    4.975230    0.063133 
C      -4.746532    3.735506    0.698288 
C      -3.613573    2.927174    0.741599 
O      -2.308068    0.440323    0.122649 
P      -2.277421   -1.277776   -0.018526 
C      -3.195653   -1.756859    1.548134 
C      -2.447506   -1.062523    2.706944 
Ir      0.001812   -1.622634   -0.078551 
C       0.002277   -3.761975   -0.651840 
O       2.306755    0.445678    0.121781 
P       2.280392   -1.273781   -0.005733 
C       3.277890   -1.434602   -1.592550 
C       2.304912   -1.020683   -2.718830 
C       2.405974    3.355181    0.134520 
C       3.189348   -1.738226    1.570343 
C       2.432660   -1.036377    2.719083 
C       3.067383   -3.266132    1.746057 
C       4.664614   -1.311739    1.590849 
C      -3.264243   -1.427147   -1.613633 
C      -2.292679   -0.984854   -2.730407 
C      -3.656031   -2.901329   -1.818944 
C      -4.507887   -0.519949   -1.659672 
C      -3.071620   -3.285786    1.713049 
C      -4.672130   -1.334593    1.563153 
C       4.510419   -0.512668   -1.644504 
C       3.689141   -2.906113   -1.777329 
H      -4.922930   -0.566913   -2.670870 
H      -4.257397    0.520348   -1.447145 
H      -5.288669   -0.838847   -0.972823 
H      -2.816184   -1.040810   -3.689078 
H      -1.411528   -1.625720   -2.787748 
H      -1.962316    0.047682   -2.593471 
H      -4.099422   -3.008780   -2.812926 
H      -4.398638   -3.232080   -1.091093 
H      -2.793204   -3.570023   -1.770666 
H      -5.076674   -1.524029    2.561771 
H      -5.269768   -1.909707    0.855107 
H      -4.797242   -0.271651    1.348934 
H      -2.876418   -1.409462    3.651058 
H      -2.556824    0.022718    2.667763 
H      -1.383021   -1.306529    2.705987 
H      -3.569186   -3.573578    2.643282 
H      -2.028359   -3.599441    1.781913 
H      -3.547887   -3.838817    0.901732 
H       5.064521   -1.494804    2.592535 
H       4.787358   -0.249434    1.371961 
H       5.267999   -1.888216    0.888800 
H       2.855416   -1.376054    3.668595 
H       1.368295   -1.280887    2.712820 
H       2.541476    0.048644    2.672973 
H       3.558206   -3.545798    2.682323 
H       3.551149   -3.824055    0.942630 
H       2.024235   -3.581638    1.808827 
H       4.137581   -3.020045   -2.768321 
H       2.834913   -3.585241   -1.724149 
H       4.433017   -3.218611   -1.042911 
H       2.832928   -1.080713   -3.674805 
H       1.957540    0.008113   -2.595968 
H       1.434474   -1.676837   -2.769910 
H       4.934167   -0.571689   -2.651450 
H       5.289540   -0.809752   -0.945885 
H       4.245170    0.527683   -1.451527 
H       0.887870   -4.355036   -0.428122 
H      -0.882833   -4.355482   -0.427487 
H       0.000808   -3.513256   -1.716796 
H       0.002088   -3.039255    0.648448 
H      -1.452909    4.948933   -0.919512 
H      -3.470104    6.373087   -1.014827 
H      -5.589794    5.598863    0.024370 
H      -5.663207    3.394089    1.165178 
H      -3.663313    1.972943    1.244705 
C       2.372691    4.597653   -0.517140 
C       3.507977    5.398203   -0.575258 
C       4.694940    4.977711    0.025312 
C       4.734895    3.751584    0.686688 
C       3.602525    2.943066    0.739670 
H       1.451142    4.924981   -0.981265 
H       3.467358    6.350229   -1.091887 
H       5.580018    5.601652   -0.020576 
H       5.648988    3.421400    1.166516 
H       3.649334    1.999325    1.262821 

90
REACTION B. TS, B3LYP-D2, conformer c_sym
G_raw (298.15 K) = -2334.930530 Hartree
N       0.000065    3.203000    0.045939 
C      -1.169683    2.562032    0.035663 
C      -1.167396    1.156961   -0.008269 
N       0.000563    0.473074   -0.039309 
C       1.168490    1.157513   -0.006129 
C       1.170794    2.562844    0.039837 
C      -2.407655    3.377031    0.043572 
C      -2.380190    4.645761   -0.555913 
C      -3.511409    5.455158   -0.554262 
C      -4.687652    5.016226    0.056079 
C      -4.721276    3.762478    0.665612 
C      -3.593317    2.945092    0.657480 
O      -2.307348    0.462384   -0.041013 
P      -2.255751   -1.261372   -0.012954 
C      -3.090585   -1.618512    1.604835 
C      -2.334811   -0.787875    2.660449 
Ir      0.000320   -1.604273   -0.086706 
C       0.000257   -3.794342   -0.459668 
O       2.308045    0.462177   -0.038365 
P       2.256253   -1.261750   -0.020609 
C       3.276082   -1.604278   -1.535156 
C       2.332818   -1.325238   -2.722420 
C       2.407300    3.380452    0.055408 
C       3.100437   -1.629375    1.589830 
C       2.349996   -0.806980    2.655551 
C       2.886526   -3.127265    1.881496 
C       4.592682   -1.281401    1.607658 
C      -3.284656   -1.613381   -1.518932 
C      -2.347444   -1.347066   -2.713862 
C      -3.681289   -3.098382   -1.489051 
C      -4.525012   -0.715836   -1.648375 
C      -2.873731   -3.114088    1.905841 
C      -4.582982   -1.271560    1.628631 
C       4.518319   -0.709352   -1.664432 
C       3.668059   -3.090739   -1.520442 
H      -4.985459   -0.920269   -2.620674 
H      -4.252666    0.340720   -1.612491 
H      -5.266078   -0.916192   -0.876356 
H      -2.900587   -1.548371   -3.636647 
H      -1.465609   -1.990769   -2.683428 
H      -2.018293   -0.304238   -2.734800 
H      -4.151640   -3.347766   -2.445123 
H      -4.400443   -3.306736   -0.693837 
H      -2.811242   -3.749753   -1.363416 
H      -4.950281   -1.400082    2.651698 
H      -5.159358   -1.932867    0.978980 
H      -4.760437   -0.236103    1.328317 
H      -2.701687   -1.078064    3.649732 
H      -2.509043    0.282616    2.530129 
H      -1.259177   -0.980558    2.613037 
H      -3.331724   -3.333500    2.875107 
H      -1.808833   -3.350305    1.968048 
H      -3.337480   -3.761668    1.159244 
H       4.965355   -1.414904    2.628146 
H       4.767877   -0.244288    1.311791 
H       5.166266   -1.938911    0.951709 
H       2.724244   -1.102419    3.640500 
H       1.274619   -1.002236    2.614166 
H       2.520777    0.264685    2.530558 
H       3.350908   -3.353207    2.846212 
H       3.345814   -3.769354    1.127421 
H       1.822255   -3.364794    1.948938 
H       4.132257   -3.333170   -2.481304 
H       2.796473   -3.740292   -1.395772 
H       4.391032   -3.308572   -0.731228 
H       2.879451   -1.522782   -3.649904 
H       2.008563   -0.280750   -2.734327 
H       1.448111   -1.965025   -2.691244 
H       4.970962   -0.904899   -2.642205 
H       5.264380   -0.920285   -0.900093 
H       4.249684    0.347651   -1.615492 
H       0.891896   -4.359745   -0.187447 
H      -0.888834   -4.361624   -0.182903 
H      -0.002727   -3.639458   -1.543745 
H       0.001181   -2.964727    0.742953 
H      -1.464420    4.985931   -1.022364 
H      -3.475851    6.428670   -1.029705 
H      -5.568927    5.647390    0.058676 
H      -5.626217    3.418019    1.152891 
H      -3.634098    1.979818    1.140624 
C       2.371634    4.661821   -0.516813 
C       3.500398    5.474376   -0.508270 
C       4.683499    5.026522    0.082020 
C       4.725553    3.760743    0.665298 
C       3.599858    2.940262    0.650383 
H       1.450498    5.010095   -0.966110 
H       3.457430    6.457631   -0.962598 
H       5.563055    5.660037    0.089766 
H       5.635581    3.408794    1.137536 
H       3.648566    1.965827    1.113532 

90
REACTION B. TS, PBE-D3, conformer c_sym
G_raw (298.15 K) = -2332.478053 Hartree
N      -0.000863    3.196996    0.170097 
C      -1.174958    2.547240    0.175952 
C      -1.174649    1.132815    0.144977 
N      -0.000714    0.435221    0.109481 
C       1.172829    1.132674    0.145651 
C       1.172233    2.546765    0.169990 
C      -2.411846    3.366410    0.153401 
C      -2.353036    4.646521   -0.435994 
C      -3.483798    5.463262   -0.482219 
C      -4.694580    5.023850    0.069896 
C      -4.760172    3.762830    0.673644 
C      -3.632261    2.937425    0.714262 
O      -2.324045    0.447132    0.121090 
P      -2.268513   -1.291284   -0.020548 
C      -3.201229   -1.769396    1.548050 
C      -2.454623   -1.069987    2.704211 
Ir      0.000418   -1.614704   -0.075302 
C       0.001079   -3.770940   -0.568651 
O       2.323229    0.448688    0.128273 
P       2.269118   -1.290414   -0.004369 
C       3.258077   -1.452589   -1.606537 
C       2.274508   -1.024581   -2.717772 
C       2.410656    3.362613    0.132123 
C       3.189471   -1.758925    1.574321 
C       2.430748   -1.055851    2.720435 
C       3.062944   -3.287113    1.745924 
C       4.665267   -1.333204    1.584771 
C      -3.246502   -1.445507   -1.630841 
C      -2.256668   -1.012022   -2.734225 
C      -3.634720   -2.922609   -1.827131 
C      -4.487891   -0.536859   -1.690204 
C      -3.071874   -3.298123    1.713185 
C      -4.678307   -1.348260    1.547646 
C       4.499557   -0.543889   -1.662104 
C       3.647863   -2.930450   -1.793523 
H      -4.900027   -0.593968   -2.711089 
H      -4.235796    0.513460   -1.486713 
H      -5.279116   -0.850063   -0.998869 
H      -2.766176   -1.086197   -3.708879 
H      -1.364076   -1.654142   -2.763434 
H      -1.932182    0.032153   -2.606861 
H      -4.072308   -3.038074   -2.831970 
H      -4.389311   -3.251845   -1.098621 
H      -2.765842   -3.596040   -1.768142 
H      -5.093079   -1.536250    2.551524 
H      -5.275940   -1.930695    0.832445 
H      -4.804820   -0.278045    1.328907 
H      -2.873091   -1.433234    3.656611 
H      -2.581181    0.021845    2.673769 
H      -1.377881   -1.300035    2.689916 
H      -3.583828   -3.588972    2.644490 
H      -2.020384   -3.609005    1.799587 
H      -3.538099   -3.859963    0.891095 
H       5.071257   -1.513739    2.593597 
H       4.790529   -0.263948    1.360492 
H       5.271080   -1.918319    0.878679 
H       2.841197   -1.413938    3.678266 
H       1.354538   -1.287773    2.697377 
H       2.555585    0.036062    2.686339 
H       3.564725   -3.571639    2.684675 
H       3.540754   -3.851301    0.932170 
H       2.011494   -3.601129    1.821256 
H       4.091470   -3.050390   -2.795185 
H       2.778881   -3.603908   -1.736539 
H       4.398299   -3.256050   -1.059087 
H       2.788819   -1.105295   -3.689385 
H       1.950629    0.020682   -2.598029 
H       1.381283   -1.665908   -2.746957 
H       4.918339   -0.605472   -2.680009 
H       5.286243   -0.853916   -0.964144 
H       4.245915    0.507232   -1.464792 
H       0.892901   -4.366351   -0.336852 
H      -0.894146   -4.363591   -0.343013 
H       0.005478   -3.529253   -1.645468 
H      -0.000764   -3.032115    0.688827 
H      -1.406364    4.987450   -0.858471 
H      -3.421233    6.446744   -0.953412 
H      -5.579882    5.662420    0.032558 
H      -5.694689    3.416609    1.120803 
H      -3.700162    1.964418    1.198454 
C       2.361799    4.620422   -0.503678 
C       3.494963    5.433304   -0.562803 
C       4.696768    5.011432    0.021601 
C       4.752410    3.771447    0.668725 
C       3.622312    2.949878    0.722551 
H       1.422818    4.945842   -0.955038 
H       3.441505    6.399436   -1.069631 
H       5.583625    5.647211   -0.025281 
H       5.680369    3.439553    1.139716 
H       3.680722    1.993565    1.240588 

90
REACTION B. TS, PBE0-D3, conformer b_sym
G_raw (298.15 K) = -2332.648151 Hartree
C      -2.334151    4.617186   -0.589235 
C      -2.382017    3.354275    0.012049 
C      -3.573944    2.940165    0.615661 
C      -4.689200    3.768127    0.609967 
C      -4.635927    5.015198   -0.001967 
C      -3.452363    5.437402   -0.600018 
C      -1.154759    2.532051    0.001911 
C      -1.156087    1.129547   -0.023549 
N       0.003399    0.442656   -0.073616 
C       1.168237    1.121512   -0.094088 
C       1.170840    2.523468   -0.082891 
N       0.011521    3.168101   -0.031625 
C       2.407291    3.329371   -0.068176 
O       2.303832    0.433497   -0.096116 
P       2.252848   -1.274207    0.068049 
C       3.039268   -1.474142    1.745269 
C       2.857275   -2.934708    2.172073 
Ir     -0.003812   -1.610418   -0.058064 
C      -0.005449   -3.770803   -0.349980 
O      -2.292591    0.446589   -0.007779 
P      -2.258205   -1.266677   -0.035432 
C      -3.228609   -1.522142   -1.607290 
C      -3.609648   -2.999546   -1.718663 
C      -3.174881   -1.640119    1.541106 
C      -3.049909   -3.144418    1.808352 
C      -4.642922   -1.222359    1.517769 
C      -2.433139   -0.874330    2.644591 
C       3.324766   -1.721400   -1.388914 
C       4.628311   -0.927202   -1.477007 
C       3.611468   -3.223613   -1.330331 
C       2.461361   -1.405297   -2.618976 
C       4.511447   -1.073905    1.793188 
C       2.230328   -0.572298    2.687640 
C      -4.463861   -0.626884   -1.722591 
C      -2.245629   -1.154998   -2.727930 
H      -4.863548   -0.731218   -2.736667 
H      -4.216618    0.425305   -1.566616 
H      -5.255398   -0.907218   -1.029219 
H      -2.744367   -1.298011   -3.691828 
H      -1.351028   -1.783143   -2.707866 
H      -1.935438   -0.107557   -2.667664 
H      -4.048323   -3.172150   -2.706467 
H      -4.354235   -3.289911   -0.974005 
H      -2.741675   -3.658950   -1.626960 
H      -5.053170   -1.342460    2.525606 
H      -5.236609   -1.846718    0.847281 
H      -4.768961   -0.176145    1.229260 
H      -2.850304   -1.171497    3.611659 
H      -2.554888    0.206683    2.544757 
H      -1.364227   -1.106416    2.645687 
H      -3.555812   -3.367620    2.752813 
H      -2.006123   -3.450148    1.910513 
H      -3.518688   -3.754903    1.033492 
H       4.832280   -1.063164    2.839837 
H       4.677151   -0.074315    1.383772 
H       5.147909   -1.786270    1.265459 
H       2.557608   -0.766102    3.713775 
H       1.158121   -0.781525    2.625244 
H       2.397061    0.486820    2.476926 
H       3.285668   -3.057489    3.171806 
H       3.364866   -3.638609    1.508490 
H       1.799873   -3.205576    2.226650 
H       4.112618   -3.518497   -2.257511 
H       2.696627   -3.816709   -1.248252 
H       4.275558   -3.481484   -0.502248 
H       3.022913   -1.676349   -3.518545 
H       2.221190   -0.340289   -2.683443 
H       1.525971   -1.970291   -2.617250 
H       5.071101   -1.107822   -2.461865 
H       5.357875   -1.234035   -0.729437 
H       4.461848    0.146500   -1.378248 
H       0.821091   -4.370695    0.034593 
H      -0.936886   -4.299112   -0.148902 
H       0.120432   -3.670384   -1.435230 
H      -0.022289   -2.908164    0.849673 
H      -1.408627    4.944074   -1.049115 
H      -3.400814    6.409184   -1.079380 
H      -5.510956    5.656305   -0.011041 
H      -5.603191    3.435123    1.090140 
H      -3.630674    1.977001    1.104055 
C       3.542539    2.970366   -0.799029 
C       4.675476    3.773130   -0.775603 
C       4.691446    4.939600   -0.018710 
C       3.561316    5.307968    0.705110 
C       2.424786    4.512639    0.676405 
H       3.532169    2.075087   -1.406962 
H       5.546349    3.487299   -1.355852 
H       5.579654    5.561973    0.003937 
H       3.565727    6.218153    1.295282 
H       1.538777    4.797876    1.232582 

90
REACTION B. TS, PBE-D2, conformer b_sym
G_raw (298.15 K) = -2332.542796 Hartree
C      -2.350517    4.676406   -0.599210 
C      -2.399940    3.389200   -0.023757 
C      -3.606086    2.956915    0.565692 
C      -4.729859    3.789697    0.571223 
C      -4.674095    5.059863   -0.016216 
C      -3.477890    5.500411   -0.599863 
C      -1.165827    2.567527   -0.038181 
C      -1.167631    1.154479   -0.079217 
N       0.006943    0.455156   -0.105575 
C       1.184198    1.150849   -0.108670 
C       1.180889    2.565031   -0.096395 
N       0.008899    3.215709   -0.054886 
C       2.416617    3.381846   -0.066381 
O       2.334694    0.462657   -0.091868 
P       2.249517   -1.277427    0.053777 
C       3.010714   -1.530438    1.741355 
C       2.733103   -2.992450    2.143933 
Ir      0.001134   -1.598498   -0.080231 
C      -0.003055   -3.803175   -0.322846 
O      -2.318196    0.469444   -0.106554 
P      -2.248284   -1.272565   -0.039716 
C      -3.273969   -1.652487   -1.555880 
C      -3.673652   -3.136661   -1.494651 
C      -3.100720   -1.587526    1.590909 
C      -2.889826   -3.077060    1.926015 
C      -4.590889   -1.228792    1.590294 
C      -2.337584   -0.733870    2.623039 
C       3.331384   -1.740706   -1.396215 
C       4.646078   -0.952515   -1.488488 
C       3.599238   -3.252139   -1.292332 
C       2.468199   -1.438377   -2.638740 
C       4.511452   -1.221807    1.804528 
C       2.228950   -0.595195    2.686058 
C      -4.509960   -0.752025   -1.709317 
C      -2.317223   -1.411038   -2.741290 
H      -4.964626   -0.970900   -2.690439 
H      -4.235165    0.312621   -1.687794 
H      -5.266700   -0.940576   -0.937484 
H      -2.857241   -1.638757   -3.675572 
H      -1.426421   -2.055553   -2.680254 
H      -1.988714   -0.360303   -2.784084 
H      -4.148318   -3.406822   -2.452484 
H      -4.399547   -3.330330   -0.690400 
H      -2.799628   -3.794079   -1.357394 
H      -4.971843   -1.326537    2.620488 
H      -5.173317   -1.907827    0.950170 
H      -4.759874   -0.192466    1.259959 
H      -2.695811   -1.007396    3.629230 
H      -2.513997    0.342062    2.473828 
H      -1.253512   -0.929387    2.564833 
H      -3.358066   -3.274907    2.904335 
H      -1.817810   -3.314932    2.005011 
H      -3.352557   -3.747976    1.187395 
H       4.827577   -1.264827    2.860172 
H       4.738371   -0.215900    1.419813 
H       5.102367   -1.964552    1.248395 
H       2.533232   -0.822448    3.721077 
H       1.141777   -0.758869    2.594011 
H       2.452180    0.462919    2.483567 
H       3.159865   -3.155258    3.147592 
H       3.195490   -3.718905    1.458817 
H       1.651033   -3.187588    2.196490 
H       4.103621   -3.579855   -2.216252 
H       2.665474   -3.829455   -1.195573 
H       4.259223   -3.487845   -0.443846 
H       3.038195   -1.731202   -3.536276 
H       2.236519   -0.363974   -2.713630 
H       1.521491   -2.000173   -2.622448 
H       5.116841   -1.193474   -2.456590 
H       5.353620   -1.218049   -0.693766 
H       4.469003    0.131940   -1.457352 
H       0.836340   -4.402440    0.057058 
H      -0.946675   -4.326900   -0.124264 
H       0.125215   -3.680547   -1.413628 
H      -0.009760   -2.938034    0.817425 
H      -1.413951    5.015004   -1.045990 
H      -3.424294    6.489660   -1.060192 
H      -5.556401    5.703896   -0.017557 
H      -5.653049    3.442676    1.040983 
H      -3.665192    1.975647    1.035173 
C       3.602099    2.992484   -0.720622 
C       4.733287    3.814126   -0.685339 
C       4.701779    5.030931    0.007868 
C       3.524158    5.429554    0.656241 
C       2.389417    4.616355    0.615006 
H       3.631935    2.057223   -1.278402 
H       5.641236    3.502797   -1.206916 
H       5.588983    5.667377    0.040510 
H       3.490874    6.377709    1.197783 
H       1.466221    4.922427    1.110651 


REACTION C. REACTANT, B3LYP, 
G_raw (298.15 K) =    -1807.422927 Hartree
C      -1.160134    3.821782    0.361077 
C       0.009277    4.539032    0.118136 
C       1.188000    3.848245   -0.157134 
C       1.192097    2.451755   -0.224185 
C       0.010717    1.694849   -0.017210 
C      -1.159362    2.423861    0.311335 
Ir      0.002946   -0.398896   -0.245570 
C       0.014279   -0.112723   -2.300069 
C       2.494372    1.725738   -0.513745 
P       2.336200   -0.075290   -0.056033 
C       3.703267   -0.926554   -1.118121 
C       4.011424   -2.341642   -0.591965 
C      -2.414264    1.666966    0.705459 
P      -2.336745   -0.102686    0.105598 
C      -2.930535   -1.105095    1.636817 
C      -1.742673   -1.078133    2.623782 
C       0.003530   -2.569319   -0.526342 
C       2.814385   -0.189858    1.809265 
C       4.290612    0.124679    2.106485 
C      -3.634120   -0.191594   -1.312260 
C      -3.483318    1.072880   -2.190070 
C       2.467270   -1.599626    2.330176 
C       1.950331    0.824705    2.588924 
C       3.160924   -1.070026   -2.553910 
C       5.009497   -0.108622   -1.192248 
C      -5.095362   -0.227434   -0.828522 
C      -3.352087   -1.449406   -2.157283 
C      -4.163613   -0.525055    2.357892 
C      -3.202602   -2.571236    1.251849 
H       2.107609    4.403338   -0.323996 
H       0.005259    5.623369    0.155166 
H      -2.075388    4.356006    0.602844 
H       3.347936    2.201666   -0.022434 
H       2.711960    1.744018   -1.587418 
H      -3.327743    2.166773    0.375189 
H      -2.472495    1.627940    1.796982 
H      -5.074589   -0.598462    1.767061 
H      -4.326948   -1.095844    3.278982 
H      -4.028897    0.518837    2.647955 
H      -2.350383   -3.018356    0.738956 
H      -3.387951   -3.150184    2.163505 
H      -4.084784   -2.677418    0.618024 
H      -0.858955   -1.557218    2.195926 
H      -1.479123   -0.064505    2.934545 
H      -2.012496   -1.636699    3.526722 
H      -5.752136   -0.164087   -1.703483 
H      -5.342885   -1.151224   -0.305595 
H      -5.337175    0.617543   -0.179802 
H      -3.486095   -2.366166   -1.580570 
H      -4.054275   -1.482205   -2.997750 
H      -2.339270   -1.454844   -2.558309 
H      -3.900454    1.954476   -1.699888 
H      -2.452851    1.301152   -2.455320 
H      -4.043266    0.921098   -3.118751 
H       2.263158   -1.684864   -2.588264 
H       2.932531   -0.106136   -3.012662 
H       3.929411   -1.550581   -3.168922 
H       5.490493    0.024339   -0.225113 
H       5.715631   -0.642029   -1.838628 
H       4.851823    0.877364   -1.633439 
H       3.105799   -2.938663   -0.468036 
H       4.651580   -2.855001   -1.317632 
H       4.549176   -2.326652    0.356436 
H       3.134609   -2.368411    1.942536 
H       2.550376   -1.608787    3.422363 
H       1.446949   -1.880686    2.062659 
H       2.117395    1.853446    2.267187 
H       0.885070    0.613685    2.491671 
H       2.213866    0.755912    3.650033 
H       4.434027    0.138078    3.192668 
H       4.970295   -0.625360    1.702371 
H       4.589354    1.105208    1.728211 
H       0.063647   -3.127570    0.422275 
H      -0.895780   -2.937592   -1.036601 
H       0.855129   -2.917466   -1.126557 
H      -0.932864    0.284851   -2.652359 
H       0.794628    0.588916   -2.597676 
H       0.188903   -1.075367   -2.784450 

78
REACTION C. REACTANT, M06L, 
G_raw (298.15 K)      -1807.262810 Hartree
C      -1.145762    3.796371    0.366801 
C       0.014110    4.510662    0.083653 
C       1.181202    3.819690   -0.228306 
C       1.182681    2.425852   -0.291942 
C       0.010102    1.671508   -0.041846 
C      -1.147573    2.401329    0.318925 
Ir      0.002319   -0.416035   -0.244667 
C       0.040043   -0.100856   -2.288901 
C       2.465114    1.688209   -0.587083 
P       2.295329   -0.075620   -0.063250 
C       3.652158   -0.966298   -1.048834 
C       3.928320   -2.346535   -0.451089 
C      -2.369527    1.634053    0.752922 
P      -2.295552   -0.103352    0.115562 
C      -2.892297   -1.120734    1.601862 
C      -1.710807   -1.105395    2.581641 
C       0.005196   -2.582221   -0.529570 
C       2.737771   -0.104899    1.787545 
C       4.206451    0.188892    2.086459 
C      -3.557280   -0.151129   -1.293356 
C      -3.380238    1.135480   -2.114525 
C       2.351330   -1.467097    2.372482 
C       1.887673    0.963018    2.487167 
C       3.110614   -1.169831   -2.466362 
C       4.954115   -0.166690   -1.151348 
C      -5.013528   -0.199808   -0.832991 
C      -3.253934   -1.379366   -2.155310 
C      -4.121097   -0.557232    2.318875 
C      -3.153356   -2.566766    1.181418 
H       2.098652    4.372935   -0.422494 
H       0.012640    5.595978    0.120489 
H      -2.053605    4.330496    0.642207 
H       3.340239    2.175872   -0.139516 
H       2.663549    1.660246   -1.668275 
H      -3.310035    2.130589    0.489617 
H      -2.373769    1.565005    1.848064 
H      -5.034734   -0.650663    1.732885 
H      -4.276971   -1.119437    3.247098 
H      -4.004540    0.492769    2.598387 
H      -2.298141   -2.992254    0.650894 
H      -3.333122   -3.179468    2.072323 
H      -4.036720   -2.660789    0.544739 
H      -0.831476   -1.600284    2.155985 
H      -1.427159   -0.092927    2.885625 
H      -1.978497   -1.654974    3.491216 
H      -5.666217   -0.112206   -1.709592 
H      -5.267588   -1.137875   -0.335203 
H      -5.263460    0.627202   -0.161802 
H      -3.392459   -2.310234   -1.599011 
H      -3.934391   -1.404439   -3.014169 
H      -2.229193   -1.376163   -2.530634 
H      -3.835890    1.994819   -1.616142 
H      -2.338511    1.393312   -2.309405 
H      -3.882749    1.017605   -3.080666 
H       2.200561   -1.772346   -2.468735 
H       2.892436   -0.223905   -2.969891 
H       3.866888   -1.689294   -3.065494 
H       5.431081    0.012368   -0.188094 
H       5.666105   -0.728816   -1.767114 
H       4.805320    0.799500   -1.639984 
H       3.007279   -2.917719   -0.302614 
H       4.562895   -2.915905   -1.139596 
H       4.457987   -2.293921    0.502187 
H       2.973974   -2.282717    2.003710 
H       2.458011   -1.437741    3.462752 
H       1.312447   -1.721329    2.145650 
H       2.127817    1.976016    2.153970 
H       0.818418    0.810418    2.317461 
H       2.078802    0.911231    3.565182 
H       4.338675    0.275401    3.171175 
H       4.875227   -0.604149    1.746626 
H       4.538549    1.133103    1.645297 
H       0.064402   -3.147914    0.416652 
H      -0.892505   -2.952174   -1.045730 
H       0.859215   -2.928887   -1.130105 
H      -0.885598    0.348865   -2.643185 
H       0.856596    0.569267   -2.571658 
H       0.175461   -1.066412   -2.786145 

78
REACTION C. REACTANT, M11L, 
G_raw (298.15 K) =         -1807.315167 Hartree
C      -1.143017    3.764122    0.344335 
C       0.014174    4.472645    0.084088 
C       1.177489    3.784738   -0.205819 
C       1.175829    2.400254   -0.272339 
C       0.008739    1.646323   -0.043892 
C      -1.143742    2.377988    0.294615 
Ir      0.000546   -0.411644   -0.244758 
C       0.032835   -0.117964   -2.261177 
C       2.454241    1.670565   -0.552412 
P       2.299461   -0.078625   -0.059330 
C       3.649220   -0.941429   -1.049340 
C       3.923693   -2.322157   -0.483653 
C      -2.367256    1.621002    0.708502 
P      -2.296799   -0.106857    0.112451 
C      -2.892059   -1.091511    1.602655 
C      -1.725346   -1.064333    2.579318 
C      -0.000513   -2.542356   -0.538528 
C       2.734099   -0.123590    1.777301 
C       4.181783    0.188631    2.096596 
C      -3.545394   -0.165912   -1.288666 
C      -3.358085    1.112773   -2.102151 
C       2.374007   -1.483506    2.353939 
C       1.879609    0.924761    2.474448 
C       3.126486   -1.122143   -2.463173 
C       4.942823   -0.151369   -1.136954 
C      -4.995492   -0.204625   -0.851574 
C      -3.250137   -1.389156   -2.137438 
C      -4.114416   -0.526061    2.303264 
C      -3.151114   -2.536883    1.224675 
H       2.103975    4.339754   -0.384485 
H       0.013557    5.563436    0.121478 
H      -2.060927    4.301340    0.603981 
H       3.326980    2.164502   -0.090846 
H       2.672622    1.664483   -1.636413 
H      -3.304209    2.121634    0.415987 
H      -2.401051    1.583475    1.810020 
H      -5.037544   -0.651231    1.728959 
H      -4.257461   -1.068560    3.251665 
H      -4.018726    0.536336    2.561087 
H      -2.293256   -2.988025    0.709139 
H      -3.332557   -3.123040    2.139712 
H      -4.039384   -2.657893    0.590953 
H      -0.844417   -1.583419    2.173151 
H      -1.425582   -0.045930    2.868508 
H      -2.005988   -1.591728    3.504811 
H      -5.635057   -0.097142   -1.742772 
H      -5.276335   -1.149046   -0.369535 
H      -5.252945    0.623022   -0.174726 
H      -3.398192   -2.323483   -1.579112 
H      -3.934823   -1.411836   -3.000189 
H      -2.222665   -1.401811   -2.519092 
H      -3.971610    1.931588   -1.702927 
H      -2.326701    1.482090   -2.133086 
H      -3.684651    0.942198   -3.139027 
H       2.215182   -1.730810   -2.492785 
H       2.915551   -0.168394   -2.965786 
H       3.896161   -1.635127   -3.060907 
H       5.435284    0.009185   -0.172506 
H       5.652144   -0.709339   -1.769628 
H       4.803620    0.828653   -1.613449 
H       3.000059   -2.893989   -0.314302 
H       4.534204   -2.890533   -1.202740 
H       4.487388   -2.293553    0.456653 
H       3.062251   -2.278111    2.044895 
H       2.411925   -1.433206    3.453654 
H       1.362013   -1.804639    2.071587 
H       2.116349    1.947551    2.150733 
H       0.803795    0.777213    2.311520 
H       2.072387    0.866679    3.557406 
H       4.290662    0.284193    3.189021 
H       4.875023   -0.599973    1.780080 
H       4.514388    1.140433    1.658595 
H       0.072043   -3.142596    0.396029 
H      -0.903329   -2.931687   -1.049229 
H       0.842770   -2.908481   -1.157441 
H      -0.888603    0.333473   -2.643560 
H       0.852417    0.553989   -2.557851 
H       0.170550   -1.087698   -2.767411 

78
REACTION C. REACTANT, PBE0, 
G_raw (298.15 K) =        -1805.847932 Hartree
C      -1.152762    3.793926    0.350253 
C       0.008535    4.508329    0.081028 
C       1.179090    3.817530   -0.212195 
C       1.182665    2.424385   -0.267688 
C       0.010127    1.668552   -0.030083 
C      -1.151286    2.399374    0.310625 
Ir      0.003146   -0.401996   -0.230365 
C       0.024000   -0.101782   -2.258456 
C       2.470481    1.694921   -0.566936 
P       2.301225   -0.077434   -0.062949 
C       3.641325   -0.964150   -1.080338 
C       3.926716   -2.354796   -0.506905 
C      -2.387448    1.641487    0.725431 
P      -2.300418   -0.106971    0.112092 
C      -2.902146   -1.108614    1.609060 
C      -1.730504   -1.076445    2.600226 
C       0.007302   -2.545281   -0.510365 
C       2.768707   -0.129601    1.781910 
C       4.239216    0.167957    2.075253 
C      -3.560148   -0.177921   -1.304919 
C      -3.398698    1.102221   -2.141543 
C       2.396268   -1.501842    2.354846 
C       1.924656    0.931114    2.500887 
C       3.097383   -1.149283   -2.500346 
C       4.946318   -0.166397   -1.180584 
C      -5.019617   -0.231346   -0.850412 
C      -3.253379   -1.411955   -2.158835 
C      -4.139436   -0.542828    2.312453 
C      -3.154692   -2.564456    1.211831 
H       2.096660    4.370699   -0.400668 
H       0.004941    5.593617    0.111908 
H      -2.065194    4.327978    0.606418 
H       3.338363    2.176743   -0.104177 
H       2.665118    1.684196   -1.647140 
H      -3.314381    2.136226    0.421200 
H      -2.418545    1.589713    1.819552 
H      -5.044148   -0.626608    1.711348 
H      -4.305685   -1.115140    3.232980 
H      -4.017229    0.503775    2.602324 
H      -2.289973   -2.996046    0.703603 
H      -3.344471   -3.153434    2.116997 
H      -4.029421   -2.672035    0.566014 
H      -0.844456   -1.566428    2.185259 
H      -1.462097   -0.060197    2.903120 
H      -2.010886   -1.625610    3.506819 
H      -5.660527   -0.153718   -1.736910 
H      -5.269946   -1.168177   -0.349614 
H      -5.276728    0.600790   -0.189129 
H      -3.397702   -2.338223   -1.597477 
H      -3.934796   -1.433767   -3.017540 
H      -2.228118   -1.407178   -2.530388 
H      -3.879083    1.955924   -1.657228 
H      -2.361096    1.378049   -2.330181 
H      -3.892146    0.954385   -3.108616 
H       2.188122   -1.751278   -2.508668 
H       2.882807   -0.197408   -2.992669 
H       3.858422   -1.663313   -3.098829 
H       5.427755   -0.004326   -0.216731 
H       5.647678   -0.728327   -1.808992 
H       4.795662    0.806040   -1.655890 
H       3.009330   -2.931258   -0.362159 
H       4.558804   -2.903345   -1.214837 
H       4.465537   -2.312903    0.441377 
H       3.043306   -2.300034    1.989835 
H       2.489564   -1.470363    3.446545 
H       1.367037   -1.773675    2.108014 
H       2.179405    1.945556    2.185187 
H       0.855550    0.794840    2.323449 
H       2.116360    0.852690    3.577453 
H       4.370978    0.234675    3.161778 
H       4.908081   -0.616634    1.717425 
H       4.560217    1.122862    1.649611 
H       0.067784   -3.111830    0.434997 
H      -0.890493   -2.915024   -1.024756 
H       0.861165   -2.891330   -1.110389 
H      -0.907792    0.331448   -2.615667 
H       0.827866    0.575898   -2.556486 
H       0.168006   -1.067354   -2.752313 

78
REACTION C. REACTANT, PBE, 
G_raw (298.15 K) =             -1805.672099 Hartree
C      -1.160280    3.821240    0.352556 
C       0.009503    4.541298    0.083076 
C       1.188820    3.846423   -0.211729 
C       1.193291    2.443621   -0.271683 
C       0.010752    1.680291   -0.035533 
C      -1.160003    2.417282    0.310347 
Ir      0.003757   -0.400106   -0.239328 
C       0.023587   -0.110348   -2.289457 
C       2.488280    1.711465   -0.569807 
P       2.311455   -0.077987   -0.062100 
C       3.678211   -0.975108   -1.089364 
C       3.960132   -2.373927   -0.509365 
C      -2.401637    1.655923    0.728361 
P      -2.308437   -0.109514    0.111328 
C      -2.913317   -1.122603    1.633470 
C      -1.724634   -1.090184    2.618504 
C       0.008269   -2.559787   -0.523550 
C       2.780064   -0.130948    1.809010 
C       4.258673    0.169460    2.104587 
C      -3.599614   -0.182224   -1.315723 
C      -3.438845    1.101124   -2.163201 
C       2.401420   -1.515101    2.373273 
C       1.923820    0.935540    2.524617 
C       3.133344   -1.157662   -2.519648 
C       4.990519   -0.170505   -1.180492 
C      -5.062106   -0.231132   -0.839770 
C      -3.298063   -1.428240   -2.170526 
C      -4.151454   -0.547075    2.347179 
C      -3.173389   -2.585844    1.232276 
H       2.112714    4.404490   -0.399140 
H       0.005492    5.634007    0.115277 
H      -2.078582    4.359278    0.612003 
H       3.362271    2.194747   -0.102163 
H       2.689538    1.696265   -1.656770 
H      -3.336459    2.150329    0.420162 
H      -2.436230    1.601804    1.830150 
H      -5.067471   -0.631828    1.749767 
H      -4.313496   -1.118297    3.278221 
H      -4.023620    0.507402    2.633797 
H      -2.305703   -3.023557    0.718696 
H      -3.364620   -3.179735    2.143119 
H      -4.055752   -2.690879    0.583841 
H      -0.834477   -1.571661    2.183556 
H      -1.458898   -0.068255    2.930270 
H      -1.991979   -1.654762    3.528923 
H      -5.719994   -0.159526   -1.723849 
H      -5.308334   -1.170078   -0.325036 
H      -5.312207    0.611602   -0.177213 
H      -3.442799   -2.358178   -1.601363 
H      -3.987847   -1.452823   -3.032151 
H      -2.268156   -1.428009   -2.550952 
H      -3.882879    1.973642   -1.661458 
H      -2.395170    1.351308   -2.392708 
H      -3.974053    0.962775   -3.118057 
H       2.216955   -1.762548   -2.533523 
H       2.920972   -0.197968   -3.014234 
H       3.899821   -1.675342   -3.121957 
H       5.472927   -0.016487   -0.207460 
H       5.699004   -0.729932   -1.816550 
H       4.840445    0.812664   -1.650577 
H       3.036767   -2.957617   -0.377369 
H       4.608853   -2.924641   -1.212484 
H       4.487765   -2.331294    0.453569 
H       3.063356   -2.313743    2.013576 
H       2.473513   -1.489346    3.474214 
H       1.371372   -1.789830    2.100943 
H       2.185366    1.957327    2.212868 
H       0.850512    0.799594    2.327588 
H       2.101761    0.853733    3.610975 
H       4.391945    0.234634    3.198747 
H       4.933249   -0.618651    1.742524 
H       4.580411    1.132092    1.678277 
H       0.070264   -3.127503    0.428859 
H      -0.896357   -2.931095   -1.039955 
H       0.868229   -2.907294   -1.127583 
H      -0.912765    0.336345   -2.640455 
H       0.842384    0.560019   -2.587602 
H       0.155365   -1.090385   -2.773932 

78
REACTION C. REACTANT, B3LYP-D2, 
G_raw (298.15 K) =           -1807.633740
C      -1.134993    3.825146    0.322146 
C       0.031824    4.532552    0.034684 
C       1.199788    3.832378   -0.270169 
C       1.194212    2.437134   -0.319063 
C       0.016337    1.690926   -0.059889 
C      -1.141497    2.427992    0.290116 
Ir      0.003342   -0.406058   -0.230854 
C       0.029953   -0.131780   -2.293824 
C       2.480529    1.688233   -0.618408 
P       2.288699   -0.076213   -0.064205 
C       3.603480   -1.015729   -1.037800 
C       3.869795   -2.388228   -0.401029 
C      -2.381419    1.670304    0.724736 
P      -2.286169   -0.092519    0.123178 
C      -2.885165   -1.090286    1.610382 
C      -1.712083   -1.057371    2.611744 
C       0.008882   -2.578264   -0.461404 
C       2.726921   -0.081938    1.777704 
C       4.206063    0.209562    2.059863 
C      -3.515218   -0.191364   -1.297579 
C      -3.352081    1.092415   -2.141938 
C       2.330430   -1.437168    2.391383 
C       1.878896    1.005685    2.466518 
C       3.027738   -1.251853   -2.444406 
C       4.920654   -0.234552   -1.183835 
C      -4.985758   -0.264533   -0.862221 
C      -3.168165   -1.438602   -2.128710 
C      -4.134915   -0.526228    2.305948 
C      -3.124819   -2.550369    1.199002 
H       2.118613    4.377637   -0.469681 
H       0.034941    5.617272    0.060421 
H      -2.041266    4.364149    0.585682 
H       3.355607    2.170783   -0.172528 
H       2.660562    1.638379   -1.698957 
H      -3.309595    2.156376    0.412964 
H      -2.404146    1.623792    1.818143 
H      -5.027149   -0.603933    1.686669 
H      -4.309748   -1.106438    3.219844 
H      -4.005397    0.518750    2.597736 
H      -2.247971   -2.962879    0.697852 
H      -3.321292   -3.142962    2.100338 
H      -3.989060   -2.650312    0.539282 
H      -0.841029   -1.576246    2.203608 
H      -1.422218   -0.036728    2.878059 
H      -2.011403   -1.576175    3.529391 
H      -5.615091   -0.207668   -1.758290 
H      -5.216197   -1.199562   -0.350330 
H      -5.252937    0.570955   -0.209559 
H      -3.323779   -2.351286   -1.549153 
H      -3.824000   -1.473994   -3.006538 
H      -2.130448   -1.427083   -2.458268 
H      -3.865755    1.932421   -1.668293 
H      -2.313836    1.387606   -2.288508 
H      -3.810317    0.926188   -3.122901 
H       2.108622   -1.835226   -2.398678 
H       2.815606   -0.312452   -2.960031 
H       3.771407   -1.801326   -3.032841 
H       5.407019   -0.046027   -0.227592 
H       5.605796   -0.825993   -1.802709 
H       4.760160    0.722629   -1.685898 
H       2.937617   -2.931146   -0.226351 
H       4.486817   -2.976838   -1.089596 
H       4.412523   -2.303029    0.541400 
H       2.945520   -2.258506    2.026510 
H       2.452345   -1.376046    3.479088 
H       1.287794   -1.677855    2.175551 
H       2.111753    2.004772    2.094131 
H       0.811180    0.837291    2.314661 
H       2.096939    0.972766    3.540327 
H       4.342011    0.313889    3.142657 
H       4.854987   -0.598383    1.719414 
H       4.528941    1.142135    1.588364 
H       0.012924   -3.111259    0.505236 
H      -0.871062   -2.945703   -1.008220 
H       0.889923   -2.943345   -1.008238 
H      -0.891976    0.318926   -2.651948 
H       0.853784    0.522264   -2.590614 
H       0.150705   -1.107473   -2.774114 

78
REACTION C. REACTANT, PBE-D2, 
G_raw (298.15 K) =        -1805.824602 Hartree
C      -1.142498    3.825516    0.331751 
C       0.027797    4.537911    0.039955 
C       1.200078    3.835553   -0.270176 
C       1.195999    2.433610   -0.322002 
C       0.013910    1.678606   -0.058514 
C      -1.148903    2.422276    0.298318 
Ir      0.001701   -0.403422   -0.231779 
C       0.030963   -0.114928   -2.285951 
C       2.480844    1.686724   -0.623880 
P       2.279878   -0.080185   -0.064778 
C       3.609039   -1.022031   -1.041638 
C       3.866154   -2.395793   -0.402189 
C      -2.383982    1.662326    0.735797 
P      -2.276425   -0.099394    0.121476 
C      -2.881726   -1.106395    1.614064 
C      -1.700653   -1.069831    2.606148 
C       0.008689   -2.565252   -0.478775 
C       2.726512   -0.077743    1.786505 
C       4.206727    0.218774    2.061525 
C      -3.519364   -0.186708   -1.304193 
C      -3.353552    1.105649   -2.135148 
C       2.332383   -1.433762    2.401552 
C       1.874572    1.013773    2.465002 
C       3.033707   -1.251977   -2.450326 
C       4.927055   -0.239957   -1.181238 
C      -4.987657   -0.261106   -0.859652 
C      -3.170314   -1.429086   -2.142635 
C      -4.129765   -0.541033    2.312350 
C      -3.119726   -2.565512    1.196089 
H       2.125329    4.385458   -0.473955 
H       0.029894    5.630880    0.066473 
H      -2.055408    4.367243    0.602104 
H       3.366799    2.170895   -0.179523 
H       2.661911    1.630021   -1.713739 
H      -3.325708    2.147160    0.431439 
H      -2.401901    1.605254    1.838465 
H      -5.032851   -0.625461    1.694537 
H      -4.299970   -1.121039    3.237146 
H      -4.002761    0.513344    2.602288 
H      -2.237003   -2.975903    0.684236 
H      -3.310796   -3.169321    2.101082 
H      -3.994162   -2.666689    0.535679 
H      -0.823160   -1.587669    2.185220 
H      -1.410531   -0.041744    2.877869 
H      -1.989770   -1.598544    3.531670 
H      -5.627834   -0.198381   -1.757832 
H      -5.218963   -1.206138   -0.347924 
H      -5.254023    0.577693   -0.197024 
H      -3.325279   -2.353026   -1.564846 
H      -3.829418   -1.462287   -3.028256 
H      -2.123515   -1.414629   -2.473792 
H      -3.866689    1.950292   -1.650139 
H      -2.306132    1.402255   -2.281950 
H      -3.816935    0.951051   -3.124770 
H       2.100444   -1.830354   -2.409021 
H       2.832046   -0.303623   -2.972187 
H       3.778321   -1.812982   -3.042110 
H       5.418583   -0.056185   -0.217246 
H       5.617348   -0.832287   -1.808216 
H       4.769132    0.727347   -1.682522 
H       2.924043   -2.940723   -0.233715 
H       4.491701   -2.991909   -1.089845 
H       4.405723   -2.312532    0.552152 
H       2.966971   -2.257868    2.050521 
H       2.432891   -1.366020    3.499258 
H       1.288139   -1.688332    2.164554 
H       2.108322    2.019462    2.085387 
H       0.799120    0.842881    2.304363 
H       2.088460    0.987439    3.548334 
H       4.346531    0.330478    3.151496 
H       4.862538   -0.596241    1.723300 
H       4.530352    1.156996    1.582587 
H       0.021125   -3.110946    0.489967 
H      -0.879755   -2.935623   -1.026011 
H       0.893101   -2.930933   -1.036345 
H      -0.893782    0.356841   -2.637190 
H       0.870641    0.533915   -2.580708 
H       0.136384   -1.099923   -2.771162 

78
REACTION C. REACTANT, B3LYP-D3, 
G_raw (298.15 K) =           -1807.550247 Hatree
C      -1.151349    3.813271    0.362930 
C       0.013519    4.530675    0.097307 
C       1.188208    3.840307   -0.198776 
C       1.191291    2.445098   -0.265604 
C       0.013681    1.689425   -0.037120 
C      -1.149991    2.416342    0.313772 
Ir      0.006704   -0.403053   -0.254511 
C       0.026204   -0.087920   -2.307151 
C       2.488814    1.712421   -0.556362 
P       2.314267   -0.072944   -0.058154 
C       3.667025   -0.968830   -1.070862 
C       3.937356   -2.369424   -0.491519 
C      -2.386920    1.651799    0.742716 
P      -2.310121   -0.105734    0.118979 
C      -2.905668   -1.124960    1.624195 
C      -1.717485   -1.114063    2.611441 
C       0.009677   -2.572025   -0.536231 
C       2.748681   -0.134581    1.808783 
C       4.224444    0.159672    2.121093 
C      -3.577914   -0.170343   -1.303801 
C      -3.401254    1.115274   -2.146238 
C       2.363404   -1.519420    2.367707 
C       1.888269    0.927860    2.528027 
C       3.121200   -1.146432   -2.501326 
C       4.986779   -0.176393   -1.160074 
C      -5.045225   -0.215735   -0.844730 
C      -3.273365   -1.414771   -2.160024 
C      -4.140563   -0.552250    2.345822 
C      -3.177339   -2.581372    1.208618 
H       2.105945    4.394419   -0.377805 
H       0.010145    5.614906    0.135626 
H      -2.062164    4.345561    0.624399 
H       3.349432    2.189250   -0.079201 
H       2.695245    1.706144   -1.631831 
H      -3.317478    2.144768    0.453244 
H      -2.400431    1.597218    1.834783 
H      -5.046880   -0.615650    1.747244 
H      -4.312212   -1.134837    3.257819 
H      -4.003832    0.487551    2.648729 
H      -2.323900   -3.015816    0.688045 
H      -3.366080   -3.180248    2.106385 
H      -4.057033   -2.669548    0.569192 
H      -0.844469   -1.608558    2.182153 
H      -1.431992   -0.104422    2.915741 
H      -1.992925   -1.665472    3.516633 
H      -5.690542   -0.136919   -1.726696 
H      -5.295965   -1.148985   -0.340464 
H      -5.293539    0.617191   -0.182764 
H      -3.415025   -2.338239   -1.596112 
H      -3.957022   -1.439707   -3.015679 
H      -2.251648   -1.412782   -2.535685 
H      -3.864528    1.976051   -1.660283 
H      -2.360659    1.371681   -2.335443 
H      -3.898318    0.976717   -3.111651 
H       2.213496   -1.747208   -2.512184 
H       2.905243   -0.192504   -2.985960 
H       3.879310   -1.656416   -3.105106 
H       5.461116   -0.024029   -0.192682 
H       5.689557   -0.738418   -1.785268 
H       4.846695    0.799564   -1.628906 
H       3.014439   -2.936288   -0.354692 
H       4.572057   -2.925330   -1.189768 
H       4.464676   -2.328580    0.461679 
H       3.013326   -2.314355    2.005463 
H       2.440857   -1.499396    3.459900 
H       1.339204   -1.786596    2.104293 
H       2.140571    1.942921    2.217333 
H       0.823353    0.787111    2.340808 
H       2.067852    0.848694    3.605483 
H       4.352144    0.209328    3.208029 
H       4.893184   -0.618312    1.753080 
H       4.546560    1.119224    1.709901 
H       0.070327   -3.132233    0.411439 
H      -0.890448   -2.936535   -1.048133 
H       0.861607   -2.917424   -1.137093 
H      -0.911202    0.333182   -2.656516 
H       0.819194    0.603910   -2.594310 
H       0.185452   -1.047076   -2.803754 

78
REACTION C. REACTANT, M06L-D3, 
G_raw (298.15 K) =        -1807.273279 Hartree
C      -1.145875    3.796198    0.367574 
C       0.013841    4.510585    0.083928 
C       1.180857    3.819681   -0.228616 
C       1.182362    2.425881   -0.292362 
C       0.009892    1.671519   -0.042037 
C      -1.147633    2.401190    0.319354 
Ir      0.002210   -0.415858   -0.245106 
C       0.040037   -0.099049   -2.288940 
C       2.464663    1.688141   -0.587506 
P       2.294609   -0.075520   -0.063208 
C       3.650608   -0.966751   -1.048402 
C       3.925364   -2.347051   -0.450248 
C      -2.369154    1.633615    0.753711 
P      -2.294823   -0.103587    0.115883 
C      -2.890425   -1.121331    1.601949 
C      -1.708329   -1.105548    2.580902 
C       0.005446   -2.581835   -0.530152 
C       2.735823   -0.104645    1.787790 
C       4.204162    0.189908    2.087383 
C      -3.555483   -0.151271   -1.293321 
C      -3.377951    1.136295   -2.112960 
C       2.349563   -1.466958    2.372602 
C       1.884815    0.962918    2.486795 
C       3.108442   -1.170134   -2.465688 
C       4.952732   -0.167546   -1.151001 
C      -5.011972   -0.201144   -0.834046 
C      -3.250262   -1.378888   -2.155510 
C      -4.119064   -0.558090    2.319212 
C      -3.150536   -2.567404    1.181223 
H       2.098319    4.372797   -0.423048 
H       0.012374    5.595853    0.120991 
H      -2.053652    4.330051    0.643657 
H       3.339919    2.175969   -0.140408 
H       2.662668    1.659680   -1.668759 
H      -3.309865    2.129993    0.490925 
H      -2.372649    1.564325    1.848830 
H      -5.032645   -0.651042    1.733012 
H      -4.275117   -1.120576    3.247221 
H      -4.002148    0.491810    2.599021 
H      -2.295031   -2.991722    0.650221 
H      -3.329304   -3.180608    2.071975 
H      -4.034070   -2.662028    0.544836 
H      -0.829637   -1.601029    2.154654 
H      -1.424100   -0.092924    2.883788 
H      -1.975181   -1.654427    3.491118 
H      -5.664198   -0.113323   -1.710952 
H      -5.265671   -1.139690   -0.336940 
H      -5.262667    0.625321   -0.162448 
H      -3.387403   -2.310003   -1.599236 
H      -3.930508   -1.404947   -3.014483 
H      -2.225416   -1.374118   -2.530500 
H      -3.837786    1.994033   -1.615658 
H      -2.335900    1.396865   -2.302597 
H      -3.875687    1.018227   -3.081494 
H       2.197921   -1.771934   -2.467383 
H       2.890602   -0.224105   -2.969164 
H       3.864082   -1.690211   -3.065075 
H       5.429103    0.012339   -0.187581 
H       5.665035   -0.730050   -1.766031 
H       4.803965    0.798316   -1.640350 
H       3.003464   -2.916668   -0.300933 
H       4.558615   -2.917757   -1.138829 
H       4.455568   -2.294642    0.502741 
H       2.973542   -2.282154    2.005221 
H       2.454267   -1.437056    3.463025 
H       1.311326   -1.722299    2.144179 
H       2.124193    1.975912    2.153132 
H       0.815757    0.809436    2.316893 
H       2.075625    0.911783    3.564877 
H       4.335850    0.276736    3.172123 
H       4.873463   -0.602874    1.747915 
H       4.535901    1.134239    1.646159 
H       0.064755   -3.147331    0.416145 
H      -0.892199   -2.951879   -1.046224 
H       0.859466   -2.928343   -1.130653 
H      -0.885368    0.351432   -2.642773 
H       0.856915    0.570895   -2.571065 
H       0.174969   -1.064328   -2.786823 

78
REACTION C. REACTANT, PBE0-D3, 
G_raw (298.15 K) =           -1805.930243 Hartree
C      -1.149187    3.790671    0.354679 
C       0.010651    4.505105    0.078072 
C       1.179721    3.814554   -0.222787 
C       1.182336    2.422115   -0.280824 
C       0.010746    1.667030   -0.037646 
C      -1.147648    2.396791    0.313583 
Ir      0.003111   -0.402080   -0.239619 
C       0.026726   -0.082508   -2.265410 
C       2.468568    1.690037   -0.577719 
P       2.289431   -0.076055   -0.062402 
C       3.622944   -0.978090   -1.060987 
C       3.888661   -2.364265   -0.469676 
C      -2.375662    1.635168    0.742209 
P      -2.287444   -0.107353    0.118156 
C      -2.882203   -1.117816    1.605238 
C      -1.704515   -1.093664    2.589536 
C       0.010389   -2.544525   -0.520812 
C       2.737250   -0.112937    1.783699 
C       4.207388    0.182723    2.077125 
C      -3.536887   -0.171034   -1.296890 
C      -3.364903    1.116894   -2.119615 
C       2.357065   -1.478325    2.367548 
C       1.890961    0.955855    2.488809 
C       3.072662   -1.170415   -2.477330 
C       4.934555   -0.193180   -1.167268 
C      -4.997296   -0.228223   -0.848826 
C      -3.219441   -1.400732   -2.152699 
C      -4.116751   -0.555577    2.314912 
C      -3.135753   -2.568343    1.192558 
H       2.097194    4.366918   -0.413573 
H       0.007533    5.590305    0.110608 
H      -2.060003    4.323546    0.618605 
H       3.337717    2.169940   -0.116005 
H       2.662818    1.671087   -1.657433 
H      -3.310113    2.125818    0.455646 
H      -2.386937    1.576423    1.836108 
H      -5.021449   -0.631568    1.713063 
H      -4.284727   -1.135320    3.230312 
H      -3.990907    0.488226    2.612793 
H      -2.273691   -2.991232    0.673284 
H      -3.319419   -3.169244    2.090916 
H      -4.013860   -2.666947    0.550272 
H      -0.826763   -1.592204    2.168232 
H      -1.422779   -0.079337    2.886803 
H      -1.981270   -1.638628    3.499441 
H      -5.636546   -0.146042   -1.735898 
H      -5.246473   -1.167980   -0.353039 
H      -5.255024    0.599796   -0.182482 
H      -3.366157   -2.328643   -1.594873 
H      -3.891978   -1.421760   -3.018175 
H      -2.190202   -1.392921   -2.512032 
H      -3.862650    1.962502   -1.638650 
H      -2.324526    1.402433   -2.275772 
H      -3.831350    0.975591   -3.100673 
H       2.157632   -1.763244   -2.474270 
H       2.863271   -0.220574   -2.975628 
H       3.825192   -1.696317   -3.075951 
H       5.416913   -0.028588   -0.204541 
H       5.631587   -0.764761   -1.791558 
H       4.791401    0.777475   -1.648482 
H       2.961711   -2.923765   -0.319295 
H       4.514641   -2.931896   -1.167616 
H       4.424760   -2.315258    0.479687 
H       2.997239   -2.284227    2.008708 
H       2.451535   -1.438387    3.458735 
H       1.325707   -1.745275    2.126220 
H       2.138258    1.966575    2.156124 
H       0.821980    0.811192    2.317679 
H       2.085829    0.894867    3.565761 
H       4.340366    0.256190    3.162865 
H       4.872920   -0.606250    1.723089 
H       4.529744    1.133562    1.643470 
H       0.080358   -3.110080    0.424647 
H      -0.890099   -2.916583   -1.028743 
H       0.861123   -2.887821   -1.126485 
H      -0.904813    0.352550   -2.619844 
H       0.829141    0.600054   -2.556158 
H       0.173550   -1.042802   -2.768388 

78
REACTION C. REACTANT, PBE-D3, 
G_raw (298.15 K) =               -1805.749568 Hartree
C      -1.158507    3.816600    0.360496 
C       0.009578    4.537719    0.085806 
C       1.188036    3.844143   -0.215940 
C       1.192478    2.442113   -0.280125 
C       0.011068    1.678647   -0.040893 
C      -1.157269    2.413425    0.315327 
Ir      0.004003   -0.399554   -0.249697 
C       0.025709   -0.085557   -2.296875 
C       2.486804    1.708842   -0.575412 
P       2.300569   -0.076027   -0.061958 
C       3.661756   -0.984449   -1.072079 
C       3.924116   -2.381213   -0.479919 
C      -2.390586    1.647508    0.745566 
P      -2.295900   -0.111134    0.115994 
C      -2.891267   -1.132961    1.629293 
C      -1.696408   -1.104406    2.607048 
C       0.012070   -2.557906   -0.536893 
C       2.747151   -0.119824    1.810779 
C       4.224349    0.180200    2.111031 
C      -3.578397   -0.175944   -1.307984 
C      -3.411114    1.116427   -2.140690 
C       2.363059   -1.500279    2.380032 
C       1.886215    0.950860    2.515377 
C       3.114231   -1.168848   -2.500929 
C       4.980688   -0.191788   -1.163533 
C      -5.041562   -0.231720   -0.837104 
C      -3.266062   -1.415808   -2.167435 
C      -4.127409   -0.562265    2.349011 
C      -3.150480   -2.592421    1.216576 
H       2.111773    4.402069   -0.403817 
H       0.005323    5.630283    0.120812 
H      -2.075784    4.352497    0.627447 
H       3.360563    2.189954   -0.105773 
H       2.690329    1.689440   -1.661509 
H      -3.332615    2.138280    0.455064 
H      -2.406494    1.585548    1.847154 
H      -5.043677   -0.644099    1.751939 
H      -4.288358   -1.138183    3.277144 
H      -3.999291    0.490876    2.639636 
H      -2.284793   -3.022435    0.693965 
H      -3.335972   -3.195847    2.122102 
H      -4.035491   -2.691483    0.571174 
H      -0.812315   -1.590386    2.165890 
H      -1.421342   -0.083594    2.914273 
H      -1.957825   -1.666732    3.520214 
H      -5.698840   -0.155579   -1.721018 
H      -5.285000   -1.174785   -0.328692 
H      -5.293218    0.605457   -0.168091 
H      -3.409898   -2.348383   -1.602562 
H      -3.948987   -1.439776   -3.034255 
H      -2.233014   -1.410284   -2.538314 
H      -3.867710    1.981073   -1.636648 
H      -2.364608    1.375705   -2.346221 
H      -3.927433    0.986204   -3.106763 
H       2.192674   -1.765612   -2.508646 
H       2.907543   -0.209446   -2.998310 
H       3.874338   -1.695262   -3.103354 
H       5.460782   -0.037616   -0.189622 
H       5.687046   -0.758542   -1.795170 
H       4.839028    0.791028   -1.636861 
H       2.991267   -2.948359   -0.343088 
H       4.565596   -2.948634   -1.175996 
H       4.450409   -2.335245    0.483471 
H       3.022189   -2.302812    2.025184 
H       2.432617   -1.469858    3.480840 
H       1.332959   -1.773780    2.108674 
H       2.141735    1.970769    2.193051 
H       0.813551    0.808312    2.320724 
H       2.064018    0.880542    3.602358 
H       4.355387    0.251164    3.204874 
H       4.897941   -0.611075    1.754317 
H       4.547860    1.139531    1.678795 
H       0.088121   -3.125220    0.414859 
H      -0.896901   -2.932529   -1.042934 
H       0.866821   -2.901587   -1.150110 
H      -0.910190    0.364957   -2.643021 
H       0.843472    0.589433   -2.587291 
H       0.158705   -1.059462   -2.792987 

78
REACTION C. REACTANT, B3LYP-D3BJ, 
G_raw (298.15 K) =           -1807.645889 Hartree
C      -1.150938    3.807828    0.347484 
C       0.012426    4.523044    0.072004 
C       1.184826    3.831284   -0.228347 
C       1.187423    2.436427   -0.286719 
C       0.012054    1.684096   -0.043529 
C      -1.149960    2.411208    0.306456 
Ir      0.005371   -0.404071   -0.242136 
C       0.023854   -0.105003   -2.288887 
C       2.479399    1.699391   -0.583523 
P       2.306542   -0.076677   -0.063539 
C       3.647899   -0.983675   -1.062159 
C       3.913036   -2.374793   -0.465547 
C      -2.384888    1.646783    0.735234 
P      -2.302776   -0.108750    0.116373 
C      -2.891416   -1.116430    1.617177 
C      -1.706017   -1.086811    2.602899 
C       0.012975   -2.566275   -0.510229 
C       2.745527   -0.109152    1.791606 
C       4.219910    0.189873    2.092757 
C      -3.564577   -0.176909   -1.299361 
C      -3.391720    1.108407   -2.137699 
C       2.360864   -1.481309    2.373261 
C       1.888296    0.961356    2.495493 
C       3.101311   -1.177691   -2.487105 
C       4.964326   -0.193301   -1.161318 
C      -5.028035   -0.226752   -0.838231 
C      -3.256594   -1.417773   -2.154279 
C      -4.129431   -0.547832    2.329714 
C      -3.148255   -2.574851    1.209522 
H       2.100828    4.384154   -0.417526 
H       0.009507    5.607079    0.104457 
H      -2.060259    4.341598    0.609545 
H       3.344685    2.182479   -0.122423 
H       2.673657    1.681027   -1.661109 
H      -3.313624    2.139090    0.440784 
H      -2.402985    1.594089    1.827098 
H      -5.032607   -0.627626    1.729096 
H      -4.295431   -1.119362    3.249142 
H      -4.001392    0.497168    2.616382 
H      -2.288268   -3.000985    0.693941 
H      -3.334819   -3.170750    2.109146 
H      -4.023802   -2.672491    0.566286 
H      -0.827929   -1.575333    2.177894 
H      -1.432686   -0.071917    2.898946 
H      -1.977750   -1.634166    3.511157 
H      -5.674638   -0.147424   -1.718685 
H      -5.273667   -1.161659   -0.335555 
H      -5.275434    0.603665   -0.173873 
H      -3.397071   -2.339872   -1.588777 
H      -3.938194   -1.443642   -3.010924 
H      -2.233838   -1.411381   -2.525719 
H      -3.858300    1.964429   -1.647874 
H      -2.352208    1.368762   -2.324666 
H      -3.887401    0.969402   -3.103265 
H       2.192631   -1.776575   -2.488591 
H       2.886170   -0.228483   -2.980207 
H       3.859090   -1.695399   -3.083702 
H       5.436040   -0.028874   -0.195188 
H       5.666627   -0.761392   -1.780659 
H       4.819446    0.776404   -1.640387 
H       2.986822   -2.932982   -0.319813 
H       4.542464   -2.942238   -1.158549 
H       4.441832   -2.322588    0.485680 
H       2.997341   -2.284759    2.007745 
H       2.456659   -1.447119    3.463203 
H       1.330275   -1.740690    2.130570 
H       2.138476    1.970868    2.168310 
H       0.824218    0.815272    2.312373 
H       2.072765    0.896310    3.572618 
H       4.348710    0.270023    3.177263 
H       4.885235   -0.599589    1.744669 
H       4.542098    1.136299    1.653413 
H       0.073984   -3.117774    0.441303 
H      -0.885266   -2.934550   -1.020518 
H       0.867420   -2.909622   -1.107145 
H      -0.906799    0.330851   -2.635911 
H       0.829258    0.568860   -2.580640 
H       0.164339   -1.070557   -2.777374 

78
REACTION C. REACTANT, PBE-D3BJ, 
G_raw (298.15 K) =        -1805.805024
C      -1.156345    3.814478    0.348545 
C       0.011299    4.533271    0.067031 
C       1.187784    3.837837   -0.237578 
C       1.190800    2.436069   -0.295911 
C       0.010443    1.675616   -0.046587 
C      -1.156393    2.411518    0.308825 
Ir      0.003194   -0.400848   -0.241254 
C       0.026325   -0.099787   -2.285832 
C       2.481001    1.698838   -0.595109 
P       2.295313   -0.079006   -0.064573 
C       3.647526   -0.996847   -1.063799 
C       3.907742   -2.384888   -0.455185 
C      -2.388747    1.646610    0.740702 
P      -2.291313   -0.111556    0.115923 
C      -2.886904   -1.125900    1.624073 
C      -1.695283   -1.090670    2.603069 
C       0.012390   -2.555976   -0.517197 
C       2.745380   -0.100716    1.799789 
C       4.222099    0.202337    2.090395 
C      -3.564892   -0.179082   -1.305915 
C      -3.395326    1.112343   -2.136617 
C       2.361124   -1.471563    2.387548 
C       1.886577    0.976630    2.492689 
C       3.096422   -1.197576   -2.487253 
C       4.964068   -0.205498   -1.167224 
C      -5.027167   -0.235570   -0.838426 
C      -3.248171   -1.418340   -2.161674 
C      -4.124895   -0.555851    2.337003 
C      -3.139465   -2.585173    1.212933 
H       2.110789    4.394138   -0.432469 
H       0.008149    5.625722    0.098069 
H      -2.072168    4.352027    0.616230 
H       3.358882    2.183447   -0.137522 
H       2.674682    1.668639   -1.682719 
H      -3.330155    2.136239    0.447176 
H      -2.405913    1.586713    1.842268 
H      -5.038128   -0.643179    1.736458 
H      -4.286152   -1.127348    3.267511 
H      -3.998818    0.499097    2.621113 
H      -2.269912   -3.010104    0.692968 
H      -3.325076   -3.188001    2.118504 
H      -4.021858   -2.686554    0.564618 
H      -0.809897   -1.577821    2.165790 
H      -1.423504   -0.067360    2.904081 
H      -1.958906   -1.648179    3.518269 
H      -5.682132   -0.158959   -1.723698 
H      -5.269481   -1.178985   -0.330689 
H      -5.278739    0.601175   -0.169315 
H      -3.393095   -2.349106   -1.594581 
H      -3.927738   -1.443857   -3.030745 
H      -2.213327   -1.410567   -2.526776 
H      -3.863302    1.972739   -1.636420 
H      -2.347949    1.377694   -2.328140 
H      -3.899145    0.978327   -3.108414 
H       2.173534   -1.792065   -2.483825 
H       2.890239   -0.243146   -2.993791 
H       3.854671   -1.732373   -3.084084 
H       5.443883   -0.039007   -0.195499 
H       5.669079   -0.779228   -1.793553 
H       4.817979    0.770940   -1.651694 
H       2.972792   -2.946183   -0.310480 
H       4.546204   -2.961836   -1.145753 
H       4.434919   -2.326670    0.506701 
H       3.013210   -2.280660    2.035573 
H       2.440263   -1.427253    3.487012 
H       1.327125   -1.741210    2.128167 
H       2.136701    1.991768    2.153068 
H       0.813907    0.826049    2.305275 
H       2.071978    0.921274    3.579024 
H       4.355804    0.292171    3.182254 
H       4.892512   -0.596062    1.744411 
H       4.544387    1.153424    1.639807 
H       0.076938   -3.117173    0.438423 
H      -0.892252   -2.929436   -1.030893 
H       0.873397   -2.902048   -1.119532 
H      -0.904681    0.359641   -2.632271 
H       0.852526    0.562971   -2.578952 
H       0.147455   -1.078741   -2.774379 


78
REACTION C. TS, B3LYP, 
G_raw (298.15 K) =        -1807.385521 Hartree
C      -1.161765    2.422982    0.304986 
C      -1.159447    3.820423    0.299099 
C      -0.000013    4.529701   -0.000025 
C       1.159432    3.820432   -0.299127 
C       1.161769    2.422991   -0.304989 
C       0.000004    1.663243   -0.000005 
C       2.433575    1.700890   -0.673946 
P       2.338837   -0.058112   -0.084664 
C       3.231443    0.004976    1.631731 
C       2.490072    1.069164    2.469723 
Ir      0.000004   -0.407919   -0.000033 
C       0.110870   -2.493464    0.960355 
C      -2.433545    1.700867    0.673999 
P      -2.338829   -0.058127    0.084687 
C      -3.231519    0.004989   -1.631663 
C      -3.112367   -1.340879   -2.370461 
C      -0.110846   -2.493368   -0.960619 
C       3.460418   -0.954195   -1.381428 
C       4.769329   -0.199755   -1.700696 
C       3.808526   -2.382273   -0.922302 
C       2.657535   -1.039811   -2.697830 
C      -3.460356   -0.954229    1.381485 
C      -3.808584   -2.382260    0.922306 
C      -2.657380   -1.039967    2.697822 
C      -4.769200   -0.199726    1.700883 
C       4.719549    0.393484    1.564343 
C       3.112264   -1.340908    2.370496 
C      -2.490195    1.069199   -2.469668 
C      -4.719625    0.393484   -1.564196 
H       2.073175    4.358349   -0.537326 
H      -0.000020    5.614545   -0.000037 
H      -2.073194    4.358332    0.537296 
H       3.323983    2.215011   -0.302686 
H       2.530579    1.657359   -1.763036 
H      -3.323981    2.214983    0.302801 
H      -2.530478    1.657316    1.763094 
H      -5.449564   -0.145119    0.854540 
H      -5.289259   -0.734532    2.503551 
H      -4.585806    0.815351    2.057881 
H      -2.924155   -2.952610    0.630860 
H      -4.289074   -2.919598    1.747472 
H      -4.508174   -2.384812    0.084759 
H      -1.773714   -1.666327    2.604155 
H      -2.337447   -0.059008    3.056370 
H      -3.299505   -1.477239    3.470417 
H      -5.074882    0.590273   -2.581912 
H      -5.337887   -0.409387   -1.160353 
H      -4.897954    1.298153   -0.978930 
H      -3.588064   -2.163538   -1.835144 
H      -3.610344   -1.252698   -3.342637 
H      -2.073288   -1.607948   -2.557375 
H      -2.627041    2.077673   -2.074984 
H      -1.419125    0.867115   -2.512933 
H      -2.892098    1.052829   -3.488925 
H       1.773738   -1.665993   -2.604227 
H       2.337829   -0.058795   -3.056427 
H       3.299644   -1.477221   -3.470361 
H       5.449673   -0.145305   -0.854328 
H       5.289370   -0.734504   -2.503414 
H       4.586025    0.815380   -2.057574 
H       2.924038   -2.952599   -0.630992 
H       4.289083   -2.919581   -1.747449 
H       4.508022   -2.384914   -0.084677 
H       3.588025   -2.163544    1.835202 
H       3.610161   -1.252732    3.342714 
H       2.073177   -1.608006    2.557319 
H       2.626906    2.077644    2.075050 
H       1.419005    0.867056    2.512956 
H       2.891947    1.052795    3.488991 
H       5.074748    0.590286    2.582077 
H       5.337842   -0.409385    1.160544 
H       4.897903    1.298149    0.979078 
H       0.102440   -1.763582    1.787962 
H      -0.719128   -3.176257    1.114620 
H       1.048022   -3.038251    0.993678 
H      -1.048002   -3.038144   -0.994000 
H      -0.102398   -1.763424   -1.788173 
H       0.719144   -3.176160   -1.114939 

78
REACTION C. TS, M06L, 
G_raw (298.15 K) =               -1807.222108 Hartree
C      -1.148056    2.393793    0.348981 
C      -1.145969    3.788323    0.343727 
C       0.000006    4.495741    0.000022 
C       1.145977    3.788323   -0.343694 
C       1.148058    2.393793   -0.348966 
C       0.000001    1.637318    0.000006 
C       2.393605    1.659690   -0.743085 
P       2.302795   -0.061668   -0.097780 
C       3.162504    0.075695    1.601699 
C       2.446207    1.203314    2.353607 
Ir      0.000001   -0.431438    0.000018 
C       0.126262   -2.481294    0.955069 
C      -2.393609    1.659692    0.743082 
P      -2.302796   -0.061663    0.097770 
C      -3.162459    0.075705   -1.601733 
C      -2.974528   -1.209897   -2.407774 
C      -0.126255   -2.481358   -0.954915 
C       3.445475   -0.980428   -1.314663 
C       4.702294   -0.189864   -1.695816 
C       3.846830   -2.341138   -0.746290 
C       2.643059   -1.200282   -2.602852 
C      -3.445525   -0.980418    1.314614 
C      -3.846894   -2.341114    0.746217 
C      -2.643149   -1.200300    2.602823 
C      -4.702341   -0.189836    1.695744 
C       4.651799    0.407735    1.533972 
C       2.974619   -1.209913    2.407742 
C      -2.446160    1.203337   -2.353618 
C      -4.651759    0.407724   -1.534044 
H       2.052486    4.325350   -0.616675 
H       0.000009    5.581577    0.000030 
H      -2.052476    4.325351    0.616712 
H       3.308447    2.175024   -0.426251 
H       2.454110    1.574988   -1.835458 
H      -3.308445    2.175032    0.426242 
H      -2.454126    1.574982    1.835455 
H      -5.361972    0.017403    0.855433 
H      -5.277549   -0.776938    2.421268 
H      -4.460335    0.759921    2.179070 
H      -2.980291   -2.912921    0.398131 
H      -4.341401   -2.936348    1.522466 
H      -4.548515   -2.249546   -0.086693 
H      -1.852013   -1.936219    2.472686 
H      -2.181287   -0.280397    2.974477 
H      -3.315822   -1.569853    3.385129 
H      -5.010891    0.630167   -2.545814 
H      -5.249866   -0.427246   -1.162006 
H      -4.863431    1.286514   -0.918485 
H      -3.391851   -2.093462   -1.919519 
H      -3.480034   -1.102994   -3.374559 
H      -1.919763   -1.399787   -2.610947 
H      -2.622700    2.184652   -1.905342 
H      -1.365687    1.036656   -2.378773 
H      -2.819611    1.236437   -3.383569 
H       1.851922   -1.936200   -2.472707 
H       2.181190   -0.280370   -2.974475 
H       3.315707   -1.569825   -3.385186 
H       5.361939    0.017377   -0.855516 
H       5.277486   -0.776976   -2.421343 
H       4.460290    0.759893   -2.179145 
H       2.980223   -2.912917   -0.398169 
H       4.341287   -2.936383   -1.522563 
H       4.548489   -2.249597    0.086591 
H       3.391910   -2.093474    1.919452 
H       3.480189   -1.103019    3.374494 
H       1.919870   -1.399805    2.610987 
H       2.622737    2.184634    1.905341 
H       1.365735    1.036625    2.378766 
H       2.819666    1.236402    3.383555 
H       5.010952    0.630189    2.545733 
H       5.249908   -0.427230    1.161926 
H       4.863446    1.286524    0.918402 
H       0.075942   -1.755138    1.789062 
H      -0.676281   -3.203045    1.101575 
H       1.086249   -2.991469    0.998322 
H      -1.086239   -2.991542   -0.998133 
H      -0.075945   -1.755255   -1.788952 
H       0.676297   -3.203109   -1.101374 

78
REACTION C. TS, M11L, 
G_raw (298.15 K) =        -1807.272875 Hartree
C      -1.140121    2.367970    0.336757 
C      -1.141018    3.753552    0.330199 
C       0.000000    4.456776    0.000000 
C       1.141019    3.753552   -0.330199 
C       1.140121    2.367970   -0.336757 
C       0.000000    1.611146    0.000000 
C       2.377087    1.638846   -0.727261 
P       2.303908   -0.063306   -0.092893 
C       3.162632    0.074461    1.589393 
C       2.449594    1.186357    2.341151 
Ir      0.000000   -0.431611    0.000000 
C       0.138183   -2.464961    0.942733 
C      -2.377087    1.638846    0.727261 
P      -2.303908   -0.063305    0.092894 
C      -3.162631    0.074461   -1.589394 
C      -2.988282   -1.197651   -2.397280 
C      -0.138184   -2.464962   -0.942731 
C       3.436958   -0.962369   -1.314154 
C       4.671227   -0.166861   -1.706041 
C       3.859621   -2.313841   -0.773290 
C       2.631625   -1.187720   -2.584507 
C      -3.436959   -0.962368    1.314154 
C      -3.859621   -2.313841    0.773290 
C      -2.631627   -1.187719    2.584508 
C      -4.671229   -0.166861    1.706040 
C       4.637672    0.416242    1.531037 
C       2.988283   -1.197650    2.397280 
C      -2.449593    1.186356   -2.341151 
C      -4.637671    0.416242   -1.531038 
H       2.055891    4.292242   -0.596252 
H       0.000000    5.548088    0.000000 
H      -2.055891    4.292242    0.596252 
H       3.295391    2.167011   -0.420201 
H       2.434656    1.561434   -1.826418 
H      -3.295391    2.167012    0.420201 
H      -2.434656    1.561435    1.826418 
H      -5.345278    0.057950    0.875020 
H      -5.247782   -0.759736    2.434442 
H      -4.420549    0.778726    2.204280 
H      -3.004849   -2.906278    0.413328 
H      -4.342435   -2.896969    1.574000 
H      -4.586034   -2.234429   -0.046067 
H      -1.878435   -1.971552    2.462666 
H      -2.113757   -0.284160    2.936678 
H      -3.313431   -1.508493    3.387886 
H      -4.983615    0.649377   -2.551184 
H      -5.256504   -0.416534   -1.173765 
H      -4.855212    1.299242   -0.914071 
H      -3.396824   -2.093412   -1.912667 
H      -3.515877   -1.082258   -3.357736 
H      -1.933879   -1.385861   -2.630661 
H      -2.632883    2.180375   -1.910253 
H      -1.363519    1.024995   -2.365402 
H      -2.821168    1.204600   -3.378266 
H       1.878435   -1.971554   -2.462665 
H       2.113754   -0.284163   -2.936677 
H       3.313429   -1.508493   -3.387886 
H       5.345276    0.057952   -0.875022 
H       5.247781   -0.759736   -2.434442 
H       4.420547    0.778725   -2.204283 
H       3.004850   -2.906278   -0.413327 
H       4.342435   -2.896969   -1.574000 
H       4.586035   -2.234428    0.046066 
H       3.396825   -2.093412    1.912668 
H       3.515878   -1.082257    3.357736 
H       1.933880   -1.385860    2.630662 
H       2.632884    2.180376    1.910253 
H       1.363519    1.024995    2.365402 
H       2.821170    1.204601    3.378266 
H       4.983617    0.649377    2.551183 
H       5.256504   -0.416534    1.173764 
H       4.855212    1.299242    0.914069 
H       0.064892   -1.770201    1.809025 
H      -0.638685   -3.225984    1.086186 
H       1.115984   -2.955434    0.986794 
H      -1.115984   -2.955435   -0.986791 
H      -0.064892   -1.770203   -1.809023 
H       0.638684   -3.225985   -1.086183 

78
REACTION C. TS, PBE0, 
G_raw (298.15 K) =        -1805.812240 Hartree
C      -1.150892    2.397050    0.327643 
C      -1.150178    3.790897    0.323303 
C       0.000000    4.498411    0.000005 
C       1.150181    3.790900   -0.323290 
C       1.150899    2.397053   -0.327630 
C       0.000004    1.638369    0.000005 
C       2.404501    1.669784   -0.713174 
P       2.305114   -0.062248   -0.091145 
C       3.169328    0.037929    1.609728 
C       2.426916    1.125269    2.397348 
Ir      0.000002   -0.420218    0.000001 
C       0.106983   -2.429917    0.949659 
C      -2.404486    1.669776    0.713201 
P      -2.305112   -0.062248    0.091153 
C      -3.169311    0.037946   -1.609728 
C      -3.026659   -1.275045   -2.382766 
C      -0.106979   -2.429927   -0.949645 
C       3.432784   -0.970579   -1.335666 
C       4.712146   -0.197567   -1.681985 
C       3.811067   -2.359905   -0.817721 
C       2.639460   -1.128610   -2.639410 
C      -3.432806   -0.970584    1.335653 
C      -3.811053   -2.359914    0.817692 
C      -2.639539   -1.128599    2.639431 
C      -4.712190   -0.197589    1.681932 
C       4.651586    0.409976    1.551263 
C       3.026707   -1.275077    2.382746 
C      -2.426907    1.125308   -2.397323 
C      -4.651575    0.409973   -1.551281 
H       2.060196    4.327572   -0.581583 
H      -0.000001    5.584034    0.000004 
H      -2.060194    4.327566    0.581599 
H       3.310070    2.182446   -0.373831 
H       2.471633    1.599624   -1.804876 
H      -3.310065    2.182444    0.373894 
H      -2.471578    1.599587    1.804904 
H      -5.374193   -0.054341    0.830114 
H      -5.265864   -0.770721    2.435247 
H      -4.496386    0.780959    2.117674 
H      -2.938566   -2.930045    0.486228 
H      -4.291000   -2.927614    1.623531 
H      -4.521341   -2.307614   -0.010765 
H      -1.804395   -1.817849    2.532140 
H      -2.243858   -0.178138    3.008171 
H      -3.310154   -1.528014    3.409411 
H      -4.994709    0.624932   -2.570330 
H      -5.268389   -0.407507   -1.171661 
H      -4.843451    1.302701   -0.949985 
H      -3.494501   -2.122561   -1.878170 
H      -3.517816   -1.160827   -3.356525 
H      -1.980352   -1.518766   -2.568338 
H      -2.588185    2.122671   -1.980928 
H      -1.350685    0.936167   -2.408889 
H      -2.800854    1.126393   -3.428111 
H       1.804427   -1.817995   -2.532110 
H       2.243589   -0.178188   -3.008047 
H       3.310080   -1.527869   -3.409467 
H       5.374156   -0.054276   -0.830179 
H       5.265824   -0.770710   -2.435289 
H       4.496318    0.780963   -2.117755 
H       2.938595   -2.930044   -0.486229 
H       4.290989   -2.927597   -1.623580 
H       4.521383   -2.307603    0.010711 
H       3.494573   -2.122572    1.878136 
H       3.517862   -1.160862    3.356506 
H       1.980407   -1.518829    2.568316 
H       2.588172    2.122640    1.980963 
H       1.350696    0.936112    2.408926 
H       2.800877    1.126348    3.428130 
H       4.994738    0.624914    2.570310 
H       5.268402   -0.407486    1.171608 
H       4.843441    1.302721    0.949986 
H       0.093458   -1.693578    1.784042 
H      -0.725193   -3.112896    1.105958 
H       1.043730   -2.978753    0.996941 
H      -1.043730   -2.978756   -0.996924 
H      -0.093441   -1.693599   -1.784036 
H       0.725193   -3.112913   -1.105931 

78
REACTION C. TS, PBE, 
G_raw (298.15 K) =            -1805.642695 Hartree
C      -1.161615    2.412932    0.329022 
C      -1.158846    3.816412    0.323469 
C       0.000076    4.528741    0.000109 
C       1.158947    3.816370   -0.323343 
C       1.161629    2.412892   -0.329015 
C      -0.000003    1.648781    0.000012 
C       2.423574    1.684040   -0.712531 
P       2.316815   -0.065200   -0.090266 
C       3.192981    0.033874    1.636539 
C       2.426749    1.112630    2.431904 
Ir     -0.000013   -0.412357    0.000104 
C       0.099639   -2.454374    0.955267 
C      -2.423659    1.684144    0.712351 
P      -2.316840   -0.065127    0.090184 
C      -3.192730    0.033857   -1.636764 
C      -3.067405   -1.297296   -2.399984 
C      -0.099782   -2.454764   -0.954286 
C       3.457930   -0.985108   -1.357563 
C       4.763879   -0.225892   -1.675161 
C       3.805240   -2.396521   -0.849788 
C       2.672499   -1.103396   -2.681183 
C      -3.458139   -0.984982    1.357355 
C      -3.805125   -2.396527    0.849719 
C      -2.672999   -1.102952    2.681176 
C      -4.764276   -0.225926    1.674550 
C       4.678473    0.429994    1.575243 
C       3.067738   -1.297226    2.399867 
C      -2.426346    1.112537   -2.432088 
C      -4.678220    0.430029   -1.575723 
H       2.075510    4.357192   -0.581767 
H       0.000110    5.621780    0.000166 
H      -2.075385    4.357266    0.581911 
H       3.333697    2.198116   -0.363067 
H       2.501066    1.611975   -1.811516 
H      -3.333684    2.198245    0.362665 
H      -2.501394    1.612156    1.811324 
H      -5.438055   -0.146542    0.814102 
H      -5.302046   -0.778299    2.465044 
H      -4.574452    0.786699    2.059923 
H      -2.912723   -2.963374    0.544206 
H      -4.299098   -2.963404    1.657981 
H      -4.501421   -2.366641   -0.000986 
H      -1.769473   -1.715269    2.584002 
H      -2.376150   -0.121300    3.081440 
H      -3.327517   -1.578849    3.432440 
H      -5.022294    0.653833   -2.600751 
H      -5.311294   -0.384519   -1.195206 
H      -4.858239    1.330314   -0.968423 
H      -3.570422   -2.132359   -1.892642 
H      -3.541012   -1.179799   -3.390439 
H      -2.017971   -1.573693   -2.566469 
H      -2.577802    2.121696   -2.021461 
H      -1.345120    0.907904   -2.435186 
H      -2.796800    1.111487   -3.472141 
H       1.769279   -1.716128   -2.583779 
H       2.375093   -0.121866   -3.081337 
H       3.327027   -1.578979   -3.432636 
H       5.437694   -0.145978   -0.814789 
H       5.301724   -0.778481   -2.465454 
H       4.573790    0.786521   -2.060962 
H       2.912987   -2.963419   -0.543930 
H       4.299051   -2.963474   -1.658095 
H       4.501775   -2.366402    0.000713 
H       3.570532   -2.132369    1.892437 
H       3.541630   -1.179716    3.390185 
H       2.018324   -1.573505    2.566662 
H       2.578260    2.121766    2.021242 
H       1.345504    0.908091    2.435087 
H       2.797277    1.111572    3.471930 
H       5.022747    0.653734    2.600218 
H       5.311443   -0.384556    1.194558 
H       4.858409    1.330306    0.967958 
H       0.122828   -1.689226    1.776261 
H      -0.757789   -3.109997    1.136213 
H       1.029071   -3.029513    1.001138 
H      -1.029261   -3.029840   -0.999945 
H      -0.122918   -1.689865   -1.775506 
H       0.757609   -3.110499   -1.134998 

78
REACTION C. TS, B3LYP-D2, 
G_raw (298.15 K) =        -1807.588726 Hartree
C      -1.154367    2.422857    0.337112 
C      -1.152993    3.818613    0.331034 
C      -0.000018    4.527291   -0.000008 
C       1.152968    3.818627   -0.331038 
C       1.154363    2.422870   -0.337103 
C       0.000001    1.664927   -0.000001 
C       2.415830    1.689781   -0.721336 
P       2.289289   -0.051814   -0.102263 
C       3.125961    0.039869    1.598306 
C       2.403426    1.166340    2.362375 
Ir      0.000004   -0.410833   -0.000024 
C       0.123240   -2.472877    0.954715 
C      -2.415808    1.689748    0.721388 
P      -2.289285   -0.051829    0.102267 
C      -3.126010    0.039879   -1.598275 
C      -2.915899   -1.260509   -2.388167 
C      -0.123232   -2.472839   -0.954830 
C       3.399798   -0.987345   -1.317197 
C       4.699479   -0.240843   -1.672263 
C       3.734828   -2.378391   -0.759648 
C       2.598121   -1.150090   -2.623372 
C      -3.399755   -0.987374    1.317224 
C      -3.734920   -2.378362    0.759612 
C      -2.597990   -1.150256    2.623331 
C      -4.699353   -0.240797    1.672439 
C       4.626621    0.355355    1.549287 
C       2.915821   -1.260531    2.388170 
C      -2.403499    1.166364   -2.362343 
C      -4.626667    0.355365   -1.549202 
H       2.061892    4.354031   -0.591874 
H      -0.000026    5.612219   -0.000014 
H      -2.061922    4.354006    0.591874 
H       3.317837    2.188919   -0.355455 
H       2.502125    1.624560   -1.811041 
H      -3.317845    2.188888    0.355585 
H      -2.502029    1.624484    1.811096 
H      -5.361677   -0.108011    0.820690 
H      -5.234923   -0.829012    2.426982 
H      -4.489500    0.740130    2.105439 
H      -2.834042   -2.903246    0.427502 
H      -4.209707   -2.977613    1.545195 
H      -4.429943   -2.313332   -0.080315 
H      -1.774948   -1.849067    2.503437 
H      -2.188753   -0.199813    2.976732 
H      -3.269584   -1.541002    3.396714 
H      -4.967390    0.577921   -2.567213 
H      -5.205035   -0.497358   -1.187302 
H      -4.847873    1.223464   -0.922975 
H      -3.312782   -2.137868   -1.875523 
H      -3.433854   -1.166489   -3.350030 
H      -1.858712   -1.423812   -2.589075 
H      -2.593236    2.147229   -1.921325 
H      -1.324854    0.995804   -2.360509 
H      -2.772413    1.173850   -3.394793 
H       1.774827   -1.848606   -2.503508 
H       2.189258   -0.199540   -2.976913 
H       3.269675   -1.541141   -3.396636 
H       5.361892   -0.108495   -0.820516 
H       5.234893   -0.828866   -2.427065 
H       4.489761    0.740282   -2.104878 
H       2.833895   -2.903235   -0.427628 
H       4.209630   -2.977627   -1.545235 
H       4.429800   -2.313454    0.080329 
H       3.312705   -2.137884    1.875516 
H       3.433756   -1.166538    3.350046 
H       1.858627   -1.423825    2.589046 
H       2.593159    2.147213    1.921372 
H       1.324783    0.995769    2.360524 
H       2.772325    1.173817    3.394830 
H       4.967287    0.578002    2.567298 
H       5.205009   -0.497403    1.187502 
H       4.847868    1.223394    0.922993 
H       0.068375   -1.730134    1.770053 
H      -0.689557   -3.179350    1.100205 
H       1.084381   -2.974599    1.003897 
H      -1.084360   -2.974584   -1.004025 
H      -0.068411   -1.730050   -1.770132 
H       0.689586   -3.179278   -1.100369 

78
REACTION C. TS, PBE-D2, 
G_raw (298.15 K) =        -1805.789828 Hartree
C      -1.159678    2.417563    0.337974 
C      -1.157789    3.819929    0.331487 
C       0.000000    4.532274    0.000000 
C       1.157789    3.819929   -0.331487 
C       1.159678    2.417563   -0.337974 
C       0.000000    1.653395    0.000000 
C       2.419678    1.685136   -0.721336 
P       2.284362   -0.059028   -0.100235 
C       3.128406    0.037617    1.609798 
C       2.379503    1.151507    2.368157 
Ir      0.000000   -0.411371    0.000000 
C       0.118226   -2.443370    0.951091 
C      -2.419678    1.685136    0.721335 
P      -2.284362   -0.059028    0.100235 
C      -3.128406    0.037617   -1.609798 
C      -2.939319   -1.268886   -2.396434 
C      -0.118225   -2.443370   -0.951090 
C       3.404765   -0.993623   -1.325324 
C       4.701890   -0.238173   -1.672926 
C       3.743923   -2.384348   -0.766452 
C       2.601664   -1.150864   -2.631841 
C      -3.404765   -0.993623    1.325324 
C      -3.743923   -2.384348    0.766452 
C      -2.601664   -1.150864    2.631840 
C      -4.701890   -0.238173    1.672926 
C       4.624166    0.378597    1.557685 
C       2.939320   -1.268886    2.396434 
C      -2.379503    1.151508   -2.368157 
C      -4.624166    0.378596   -1.557686 
H       2.074311    4.358330   -0.594954 
H       0.000000    5.625431    0.000000 
H      -2.074311    4.358330    0.594954 
H       3.331895    2.184363   -0.354409 
H       2.508274    1.613993   -1.819939 
H      -3.331895    2.184363    0.354408 
H      -2.508274    1.613993    1.819939 
H      -5.364939   -0.101978    0.811188 
H      -5.248402   -0.827094    2.431069 
H      -4.489772    0.749158    2.110990 
H      -2.840460   -2.914614    0.422546 
H      -4.217303   -2.990774    1.558764 
H      -4.451061   -2.316951   -0.074298 
H      -1.768113   -1.851856    2.514897 
H      -2.192235   -0.191737    2.987376 
H      -3.277666   -1.544038    3.411886 
H      -4.964376    0.608412   -2.583177 
H      -5.222479   -0.470817   -1.194656 
H      -4.835133    1.258044   -0.928860 
H      -3.373100   -2.142286   -1.888906 
H      -3.442167   -1.159433   -3.373908 
H      -1.875460   -1.464073   -2.584098 
H      -2.558021    2.144971   -1.929525 
H      -1.294685    0.959826   -2.348785 
H      -2.737346    1.162350   -3.413111 
H       1.768112   -1.851855   -2.514897 
H       2.192236   -0.191736   -2.987377 
H       3.277666   -1.544039   -3.411886 
H       5.364938   -0.101977   -0.811188 
H       5.248402   -0.827094   -2.431069 
H       4.489772    0.749157   -2.110991 
H       2.840460   -2.914614   -0.422546 
H       4.217303   -2.990774   -1.558764 
H       4.451061   -2.316952    0.074298 
H       3.373100   -2.142286    1.888906 
H       3.442168   -1.159434    3.373907 
H       1.875460   -1.464073    2.584098 
H       2.558021    2.144971    1.929525 
H       1.294685    0.959825    2.348785 
H       2.737346    1.162349    3.413111 
H       4.964376    0.608413    2.583177 
H       5.222479   -0.470817    1.194655 
H       4.835133    1.258044    0.928859 
H       0.078381   -1.673443    1.768157 
H      -0.711353   -3.140137    1.115990 
H       1.079632   -2.963261    1.009581 
H      -1.079632   -2.963262   -1.009581 
H      -0.078381   -1.673443   -1.768156 
H       0.711353   -3.140136   -1.115990 

78
REACTION C. TS, B3LYP-D3, 
G_raw (298.15 K) =        -1807.510146 Hartree
C      -1.150900    2.412868    0.345628 
C      -1.149458    3.809147    0.339992 
C      -0.000001    4.517575   -0.000003 
C       1.149457    3.809148   -0.339996 
C       1.150901    2.412869   -0.345631 
C       0.000000    1.655780   -0.000002 
C       2.406787    1.679806   -0.744130 
P       2.313984   -0.055907   -0.098838 
C       3.174132    0.065979    1.618113 
C       2.439493    1.179130    2.396238 
Ir      0.000000   -0.416898   -0.000004 
C       0.134076   -2.493070    0.961186 
C      -2.406785    1.679803    0.744132 
P      -2.313983   -0.055910    0.098840 
C      -3.174141    0.065978   -1.618106 
C      -3.003400   -1.243601   -2.408972 
C      -0.134073   -2.493061   -0.961211 
C       3.442955   -0.994378   -1.336767 
C       4.741355   -0.239219   -1.691871 
C       3.799542   -2.388637   -0.792210 
C       2.639958   -1.160955   -2.645001 
C      -3.442948   -0.994380    1.336774 
C      -3.799561   -2.388630    0.792211 
C      -2.639933   -1.160980    2.644994 
C      -4.741333   -0.239207    1.691902 
C       4.669405    0.418251    1.555744 
C       3.003383   -1.243600    2.408977 
C      -2.439505    1.179129   -2.396236 
C      -4.669413    0.418253   -1.555726 
H       2.054906    4.346658   -0.608239 
H      -0.000002    5.602370   -0.000004 
H      -2.054908    4.346656    0.608235 
H       3.314844    2.193590   -0.418982 
H       2.459112    1.600224   -1.833725 
H      -3.314843    2.193586    0.418987 
H      -2.459105    1.600222    1.833727 
H      -5.407173   -0.108873    0.842995 
H      -5.284758   -0.819200    2.446158 
H      -4.540986    0.743041    2.123826 
H      -2.915701   -2.939693    0.463313 
H      -4.281540   -2.975291    1.581787 
H      -4.498100   -2.331658   -0.044130 
H      -1.792269   -1.829143    2.523850 
H      -2.263438   -0.210296    3.029053 
H      -3.297577   -1.588947    3.409421 
H      -5.022351    0.634075   -2.570223 
H      -5.270878   -0.408522   -1.175814 
H      -4.868490    1.303332   -0.947576 
H      -3.431163   -2.109493   -1.903260 
H      -3.513573   -1.141399   -3.373223 
H      -1.953944   -1.448915   -2.612585 
H      -2.609407    2.168155   -1.967283 
H      -1.363481    1.001165   -2.413488 
H      -2.813301    1.191283   -3.425978 
H       1.792257   -1.829074   -2.523868 
H       2.263521   -0.210255   -3.029079 
H       3.297597   -1.588962   -3.409409 
H       5.407195   -0.108923   -0.842959 
H       5.284771   -0.819201   -2.446142 
H       4.541028    0.743045   -2.123767 
H       2.915670   -2.939693   -0.463334 
H       4.281529   -2.975297   -1.581783 
H       4.498067   -2.331680    0.044143 
H       3.431148   -2.109493    1.903268 
H       3.513549   -1.141399    3.373232 
H       1.953925   -1.448912    2.612582 
H       2.609398    2.168157    1.967286 
H       1.363468    1.001167    2.413485 
H       2.813283    1.191285    3.425982 
H       5.022334    0.634081    2.570242 
H       5.270872   -0.408528    1.175844 
H       4.868488    1.303326    0.947589 
H       0.088901   -1.763884    1.787285 
H      -0.668437   -3.210369    1.109569 
H       1.092793   -2.999851    0.995603 
H      -1.092788   -2.999844   -0.995632 
H      -0.088900   -1.763868   -1.787305 
H       0.668443   -3.210356   -1.109602 

78
REACTION C. TS, M06L-D3, 
G_raw (298.15 K) =        -1807.232493
C      -1.148013    2.394123    0.349048 
C      -1.145965    3.788633    0.343872 
C       0.000002    4.496071    0.000012 
C       1.145965    3.788631   -0.343856 
C       1.148008    2.394121   -0.349044 
C      -0.000003    1.637690    0.000002 
C       2.393295    1.659761   -0.743172 
P       2.301911   -0.061542   -0.097757 
C       3.160420    0.075133    1.602033 
C       2.443629    1.202591    2.353661 
Ir     -0.000001   -0.431137    0.000012 
C       0.126549   -2.480549    0.954915 
C      -2.393307    1.659765    0.743160 
P      -2.301914   -0.061539    0.097749 
C      -3.160395    0.075131   -1.602055 
C      -2.971021   -1.210507   -2.407687 
C      -0.126535   -2.480583   -0.954825 
C       3.443164   -0.980521   -1.314954 
C       4.700561   -0.190805   -1.695674 
C       3.842844   -2.341888   -0.746975 
C       2.639813   -1.198635   -2.602896 
C      -3.443189   -0.980515    1.314929 
C      -3.842847   -2.341891    0.746955 
C      -2.639863   -1.198610    2.602889 
C      -4.700600   -0.190806    1.695618 
C       4.649811    0.406592    1.535090 
C       2.971064   -1.210501    2.407677 
C      -2.443596    1.202587   -2.353679 
C      -4.649787    0.406589   -1.535138 
H       2.052522    4.325482   -0.616996 
H       0.000005    5.581865    0.000018 
H      -2.052520    4.325485    0.617014 
H       3.308343    2.174971   -0.426774 
H       2.453286    1.574803   -1.835546 
H      -3.308349    2.174975    0.426743 
H      -2.453317    1.574813    1.835533 
H      -5.359894    0.016032    0.854907 
H      -5.275817   -0.778042    2.421012 
H      -4.459140    0.759185    2.178792 
H      -2.975481   -2.912360    0.398485 
H      -4.336138   -2.937907    1.523346 
H      -4.544824   -2.251286   -0.085792 
H      -1.848681   -1.934469    2.472936 
H      -2.177604   -0.278235    2.972915 
H      -3.311773   -1.567257    3.386260 
H      -5.008676    0.628851   -2.547020 
H      -5.247593   -0.428647   -1.163153 
H      -4.861956    1.285326   -0.919644 
H      -3.386002   -2.094760   -1.918659 
H      -3.477649   -1.104960   -3.374018 
H      -1.916057   -1.398235   -2.611810 
H      -2.620410    2.184015   -1.905814 
H      -1.363142    1.035632   -2.377762 
H      -2.816007    1.235372   -3.383988 
H       1.848674   -1.934538   -2.472932 
H       2.177494   -0.278279   -2.972895 
H       3.311720   -1.567234   -3.386292 
H       5.359862    0.016059   -0.854975 
H       5.275778   -0.778051   -2.421062 
H       4.459085    0.759171   -2.178869 
H       2.975488   -2.912360   -0.398483 
H       4.336126   -2.937907   -1.523368 
H       4.544835   -2.251267    0.085759 
H       3.386015   -2.094761    1.918635 
H       3.477733   -1.104955    3.373985 
H       1.916107   -1.398218    2.611847 
H       2.620446    2.184019    1.905795 
H       1.363175    1.035639    2.377746 
H       2.816043    1.235375    3.383969 
H       5.008719    0.628846    2.546968 
H       5.247607   -0.428642    1.163088 
H       4.861969    1.285333    0.919599 
H       0.075847   -1.754447    1.788872 
H      -0.675659   -3.202641    1.101209 
H       1.086766   -2.990227    0.998064 
H      -1.086742   -2.990279   -0.997957 
H      -0.075845   -1.754507   -1.788803 
H       0.675686   -3.202665   -1.101095 

78
REACTION C. TS, PBE0-D3, 
G_raw (298.15 K) =        -1805.892908 Hartree
C      -1.146460    2.393910    0.343838 
C      -1.146079    3.787156    0.339572 
C      -0.000002    4.494256   -0.000006 
C       1.146076    3.787157   -0.339582 
C       1.146459    2.393911   -0.343843 
C       0.000000    1.636291   -0.000003 
C       2.394483    1.662637   -0.738317 
P       2.292174   -0.060190   -0.096527 
C       3.143888    0.061022    1.603074 
C       2.404639    1.165604    2.369523 
Ir      0.000000   -0.422913   -0.000006 
C       0.124598   -2.429328    0.950003 
C      -2.394481    1.662634    0.738318 
P      -2.292173   -0.060193    0.096529 
C      -3.143903    0.061018   -1.603063 
C      -2.979398   -1.238217   -2.394010 
C      -0.124596   -2.429311   -0.950046 
C       3.414811   -0.986447   -1.320928 
C       4.699527   -0.227188   -1.675181 
C       3.776000   -2.369654   -0.777253 
C       2.618454   -1.156486   -2.621240 
C      -3.414797   -0.986450    1.320941 
C      -3.776012   -2.369649    0.777263 
C      -2.618413   -1.156508    2.621235 
C      -4.699497   -0.227179    1.675223 
C       4.628797    0.418172    1.544060 
C       2.979369   -1.238212    2.394020 
C      -2.404657    1.165597   -2.369521 
C      -4.628810    0.418173   -1.544033 
H       2.052909    4.323427   -0.609311 
H      -0.000003    5.579845   -0.000008 
H      -2.052913    4.323426    0.609300 
H       3.305689    2.173234   -0.411902 
H       2.448282    1.580935   -1.829495 
H      -3.305690    2.173229    0.411907 
H      -2.448277    1.580936    1.829497 
H      -5.360892   -0.077485    0.824447 
H      -5.251352   -0.812895    2.419999 
H      -4.490042    0.747220    2.123130 
H      -2.894088   -2.920887    0.438727 
H      -4.252636   -2.958584    1.569431 
H      -4.481912   -2.308100   -0.054141 
H      -1.784523   -1.844795    2.503526 
H      -2.219234   -0.210080    2.996394 
H      -3.285420   -1.563146    3.390310 
H      -4.973499    0.642629   -2.560330 
H      -5.237396   -0.409754   -1.174211 
H      -4.827924    1.301486   -0.931282 
H      -3.417222   -2.104641   -1.895164 
H      -3.484105   -1.124939   -3.360741 
H      -1.928878   -1.449676   -2.593585 
H      -2.571799    2.155710   -1.938537 
H      -1.327728    0.980441   -2.377375 
H      -2.772791    1.180468   -3.402122 
H       1.784520   -1.844723   -2.503545 
H       2.219346   -0.210041   -2.996431 
H       3.285461   -1.563177   -3.390287 
H       5.360918   -0.077531   -0.824396 
H       5.251375   -0.812893   -2.419970 
H       4.490091    0.747227   -2.123060 
H       2.894062   -2.920889   -0.438747 
H       4.252642   -2.958586   -1.569413 
H       4.481876   -2.308118    0.054172 
H       3.417203   -2.104637    1.895184 
H       3.484058   -1.124932    3.360760 
H       1.928845   -1.449671    2.593575 
H       2.571786    2.155715    1.938539 
H       1.327710    0.980451    2.377372 
H       2.772767    1.180477    3.402127 
H       4.973472    0.642635    2.560360 
H       5.237387   -0.409759    1.174253 
H       4.827921    1.301480    0.931305 
H       0.088225   -1.695771    1.785067 
H      -0.688419   -3.136464    1.103694 
H       1.076529   -2.952020    0.994681 
H      -1.076526   -2.952006   -0.994730 
H      -0.088228   -1.695739   -1.785097 
H       0.688422   -3.136442   -1.103750 

REACTION C. TS, PBE-D3, 
G_raw (298.15 K) =           -1805.718930 Hartree
C      -1.156255    2.408735    0.347915 
C      -1.153829    3.811618    0.342585 
C      -0.000019    4.523568   -0.000038 
C       1.153803    3.811627   -0.342636 
C       1.156251    2.408743   -0.347931 
C       0.000001    1.645667   -0.000008 
C       2.412444    1.676147   -0.741400 
P       2.304488   -0.062628   -0.096360 
C       3.166907    0.060637    1.629541 
C       2.391206    1.146246    2.406452 
Ir      0.000004   -0.415478   -0.000024 
C       0.122385   -2.455632    0.954448 
C      -2.412422    1.676124    0.741433 
P      -2.304481   -0.062648    0.096385 
C      -3.166967    0.060630   -1.629483 
C      -3.035400   -1.260420   -2.408240 
C      -0.122339   -2.455531   -0.954694 
C       3.439699   -1.002941   -1.341967 
C       4.753134   -0.260362   -1.664401 
C       3.766747   -2.409253   -0.808744 
C       2.653226   -1.131391   -2.663926 
C      -3.439654   -1.002963    1.342026 
C      -3.766788   -2.409241    0.808768 
C      -2.653115   -1.131485    2.663936 
C      -4.753043   -0.260340    1.664552 
C       4.651422    0.457548    1.568653 
C       3.035315   -1.260421    2.408281 
C      -2.391291    1.146245   -2.406408 
C      -4.651480    0.457537   -1.568537 
H       2.066621    4.351865   -0.614648 
H      -0.000027    5.616555   -0.000054 
H      -2.066653    4.351849    0.614590 
H       3.328062    2.189957   -0.407138 
H       2.475266    1.590833   -1.839955 
H      -3.328064    2.189922    0.407220 
H      -2.475183    1.590801    1.839990 
H      -5.425359   -0.180310    0.803283 
H      -5.287838   -0.823842    2.448997 
H      -4.573303    0.751070    2.057607 
H      -2.865749   -2.953117    0.487262 
H      -4.248415   -3.001256    1.606038 
H      -4.465812   -2.371118   -0.039229 
H      -1.742603   -1.730752    2.555900 
H      -2.366681   -0.152604    3.078162 
H      -3.300326   -1.626776    3.408738 
H      -4.993526    0.696512   -2.590592 
H      -5.285257   -0.362145   -1.200635 
H      -4.831290    1.348724   -0.947933 
H      -3.525132   -2.106592   -1.907104 
H      -3.516057   -1.136739   -3.394326 
H      -1.984052   -1.522488   -2.583906 
H      -2.535905    2.150760   -1.982447 
H      -1.311779    0.932169   -2.405619 
H      -2.756464    1.161753   -3.448026 
H       1.742653   -1.730577   -2.555946 
H       2.366899   -0.152483   -3.078164 
H       3.300439   -1.626732   -3.408691 
H       5.425424   -0.180410   -0.803104 
H       5.287932   -0.823844   -2.448860 
H       4.573454    0.751079   -2.057403 
H       2.865664   -2.953118   -0.487345 
H       4.248424   -3.001245   -1.606000 
H       4.465697   -2.371194    0.039316 
H       3.525089   -2.106581    1.907165 
H       3.515912   -1.136742    3.394395 
H       1.983960   -1.522509    2.583883 
H       2.535819    2.150762    1.982494 
H       1.311696    0.932162    2.405648 
H       2.756363    1.161758    3.448076 
H       4.993427    0.696529    2.590721 
H       5.285218   -0.362133    1.200782 
H       4.831255    1.348731    0.948051 
H       0.120199   -1.691691    1.776287 
H      -0.712860   -3.139930    1.136542 
H       1.070125   -3.000607    0.995202 
H      -1.070070   -3.000518   -0.995503 
H      -0.120151   -1.691531   -1.776481 
H       0.712911   -3.139808   -1.136845 

REACTION C. TS, B3LYP-D3BJ, 
G_raw (298.15 K) =          -1807.605755 Hartree
C      -1.151364    2.409367    0.344121 
C      -1.149827    3.805029    0.338449 
C      -0.000002    4.513068   -0.000007 
C       1.149825    3.805030   -0.338458 
C       1.151365    2.409368   -0.344125 
C       0.000001    1.654493   -0.000003 
C       2.406181    1.674343   -0.737894 
P       2.308861   -0.060437   -0.097766 
C       3.165347    0.058938    1.608567 
C       2.417209    1.158483    2.387389 
Ir      0.000000   -0.412466   -0.000008 
C       0.131011   -2.479475    0.954783 
C      -2.406175    1.674340    0.737901 
P      -2.308859   -0.060440    0.097770 
C      -3.165369    0.058938   -1.608551 
C      -3.012094   -1.253341   -2.392561 
C      -0.131009   -2.479451   -0.954848 
C       3.427976   -0.993552   -1.331683 
C       4.721534   -0.236461   -1.685091 
C       3.783080   -2.386204   -0.789779 
C       2.622465   -1.156357   -2.635447 
C      -3.427956   -0.993558    1.331700 
C      -3.783071   -2.386207    0.789794 
C      -2.622424   -1.156373    2.635451 
C      -4.721506   -0.236467    1.685133 
C       4.653721    0.428343    1.545478 
C       3.012057   -1.253343    2.392571 
C      -2.417239    1.158482   -2.387381 
C      -4.653741    0.428345   -1.545439 
H       2.055433    4.342159   -0.605449 
H      -0.000003    5.597476   -0.000009 
H      -2.055436    4.342157    0.605440 
H       3.311884    2.187474   -0.406704 
H       2.466136    1.597824   -1.827199 
H      -3.311883    2.187470    0.406720 
H      -2.466120    1.597820    1.827206 
H      -5.382920   -0.102310    0.833875 
H      -5.266682   -0.814938    2.438530 
H      -4.514954    0.744147    2.116564 
H      -2.899536   -2.929775    0.449001 
H      -4.252046   -2.976727    1.583671 
H      -4.490773   -2.329927   -0.038187 
H      -1.785909   -1.838057    2.514693 
H      -2.228485   -0.206841    3.003163 
H      -3.283025   -1.564260    3.407481 
H      -5.001685    0.653764   -2.559067 
H      -5.264001   -0.393778   -1.170611 
H      -4.842096    1.311474   -0.931957 
H      -3.465078   -2.106113   -1.887679 
H      -3.508079   -1.142121   -3.362607 
H      -1.964984   -1.481690   -2.580609 
H      -2.574058    2.148952   -1.958581 
H      -1.344319    0.965021   -2.400443 
H      -2.790749    1.172425   -3.416653 
H       1.785940   -1.838031   -2.514703 
H       2.228543   -0.206821   -3.003166 
H       3.283075   -1.564251   -3.407466 
H       5.382936   -0.102316   -0.833822 
H       5.266718   -0.814928   -2.438485 
H       4.514992    0.744158   -2.116515 
H       2.899538   -2.929775   -0.449010 
H       4.252073   -2.976718   -1.583650 
H       4.490763   -2.329930    0.038218 
H       3.465052   -2.106113    1.887697 
H       3.508021   -1.142124    3.362629 
H       1.964942   -1.481693    2.580594 
H       2.574031    2.148951    1.958589 
H       1.344290    0.965021    2.400443 
H       2.790711    1.172427    3.416664 
H       5.001648    0.653762    2.559112 
H       5.263987   -0.393780    1.170661 
H       4.842086    1.311472    0.932000 
H       0.095497   -1.746168    1.778694 
H      -0.677292   -3.187667    1.109670 
H       1.085346   -2.992498    0.987098 
H      -1.085343   -2.992474   -0.987174 
H      -0.095496   -1.746125   -1.778743 
H       0.677293   -3.187640   -1.109752 

REACTION C. TS, PBE-D3BJ, 
G_raw (298.15 K) =      -1805.774822 Hartree
C      -1.157422    2.408282    0.344154 
C      -1.155078    3.810696    0.338530 
C      -0.000053    4.522406   -0.000036 
C       1.155004    3.810727   -0.338562 
C       1.157398    2.408312   -0.344149 
C      -0.000008    1.646552   -0.000015 
C       2.413421    1.674580   -0.734113 
P       2.301054   -0.064951   -0.096070 
C       3.158526    0.052554    1.623699 
C       2.381886    1.138392    2.395898 
Ir      0.000010   -0.412225   -0.000065 
C       0.112235   -2.445928    0.951981 
C      -2.413381    1.674503    0.734230 
P      -2.301042   -0.065003    0.096117 
C      -3.158676    0.052571   -1.623567 
C      -3.022096   -1.266992   -2.400555 
C      -0.112092   -2.445755   -0.952471 
C       3.431600   -1.000751   -1.336960 
C       4.744236   -0.258679   -1.654260 
C       3.753410   -2.406414   -0.803663 
C       2.649159   -1.124737   -2.659727 
C      -3.431489   -1.000849    1.337058 
C      -3.753479   -2.406426    0.803644 
C      -2.648896   -1.125037    2.659714 
C      -4.744021   -0.258687    1.654588 
C       4.642225    0.446183    1.566756 
C       3.022074   -1.267087    2.400584 
C      -2.382235    1.138576   -2.395729 
C      -4.642417    0.446012   -1.566494 
H       2.068532    4.350793   -0.607667 
H      -0.000073    5.615159   -0.000056 
H      -2.068619    4.350738    0.607643 
H       3.327824    2.186161   -0.393847 
H       2.481566    1.592823   -1.832543 
H      -3.327848    2.186062    0.394101 
H      -2.481374    1.592699    1.832665 
H      -5.412565   -0.179188    0.790782 
H      -5.279947   -0.821013    2.438699 
H      -4.562223    0.752742    2.046002 
H      -2.850083   -2.944103    0.478786 
H      -4.230087   -3.001203    1.601477 
H      -4.454089   -2.368713   -0.042712 
H      -1.737659   -1.723377    2.554735 
H      -2.365228   -0.143900    3.069820 
H      -3.298696   -1.618010    3.403375 
H      -4.979644    0.688811   -2.588979 
H      -5.274935   -0.377072   -1.204742 
H      -4.825393    1.333598   -0.942140 
H      -3.513688   -2.112441   -1.900531 
H      -3.497831   -1.142835   -3.388649 
H      -1.969441   -1.527371   -2.569328 
H      -2.533004    2.141834   -1.971843 
H      -1.302585    0.926264   -2.384066 
H      -2.740345    1.151250   -3.439487 
H       1.737769   -1.722872   -2.554890 
H       2.365766   -0.143530   -3.069855 
H       3.298954   -1.617839   -3.403307 
H       5.412747   -0.179443   -0.790402 
H       5.280139   -0.820904   -2.438459 
H       4.562585    0.752856   -2.045467 
H       2.849933   -2.944061   -0.478979 
H       4.230071   -3.001137   -1.601505 
H       4.453919   -2.368857    0.042783 
H       3.513829   -2.112427    1.900538 
H       3.497724   -1.142924    3.388718 
H       1.969451   -1.527650    2.569285 
H       2.532501    2.141699    1.972076 
H       1.302272    0.925895    2.384192 
H       2.739969    1.151062    3.439667 
H       4.979330    0.689037    2.589268 
H       5.274868   -0.376838    1.205080 
H       4.825157    1.333776    0.942402 
H       0.120915   -1.678195    1.771374 
H      -0.733683   -3.115754    1.134960 
H       1.052386   -3.002862    0.996609 
H      -1.052211   -3.002739   -0.997206 
H      -0.120796   -1.677930   -1.771779 
H       0.733864   -3.115510   -1.135541 

80
REACTION D. E_ISOMER, B3LYP-D2, 
G_raw (298.15 K) =   -2012.369645 Hartree
C       1.170205   -4.073628   -0.460942 
C      -0.049818   -4.751967   -0.519068 
C      -1.256842   -4.053339   -0.435671 
C      -1.216345   -2.669370   -0.300934 
C      -0.023526   -1.927873   -0.247603 
C       1.155355   -2.689260   -0.326110 
O      -2.419384   -1.973976   -0.212498 
P      -2.227814   -0.314375    0.029910 
C      -2.965381   -0.085349    1.737791 
C      -2.572609    1.317721    2.230994 
Ir     -0.002996    0.091081   -0.053040 
N       0.032054    2.207048    0.173580 
C       0.042683    3.207161   -0.631264 
C       0.077050    4.643745   -0.168982 
H      -0.793937    5.148775   -0.605387 
O       2.372034   -2.014417   -0.262043 
P       2.214412   -0.358235    0.019268 
C       3.352733    0.291539   -1.311250 
C       3.562814    1.792628   -1.062085 
C      -3.349127    0.319960   -1.322360 
C      -4.712573   -0.379111   -1.427171 
C      -3.515321    1.834426   -1.128076 
C      -2.568544    0.044318   -2.622421 
C       2.953716   -0.182635    1.733791 
C       2.575480    1.210931    2.264559 
C       4.468172   -0.391658    1.822790 
C       2.231819   -1.238811    2.592344 
C      -4.481979   -0.276018    1.832039 
C      -2.253329   -1.124449    2.624925 
C       4.694931   -0.443395   -1.442313 
C       2.565692    0.090990   -2.620794 
C       0.107154    4.855495    1.345109 
H       5.187553   -0.106155   -2.362231 
H       4.534988   -1.521529   -1.514045 
H       5.367157   -0.242345   -0.609320 
H       3.145472    0.512459   -3.450660 
H       1.591041    0.578401   -2.571556 
H       2.401944   -0.972765   -2.812918 
H       4.068105    2.234706   -1.928344 
H       4.186015    1.968232   -0.180892 
H       2.604761    2.302476   -0.922250 
H       4.761817   -0.409600    2.879044 
H       5.014188    0.421415    1.338028 
H       4.766951   -1.338973    1.367662 
H       2.515668   -1.093273    3.641116 
H       2.508105   -2.250569    2.287965 
H       1.147728   -1.133357    2.493249 
H       2.969036    1.322214    3.281760 
H       1.487836    1.309649    2.294307 
H       2.983681    2.017063    1.649446 
H      -4.774739   -0.270183    2.888680 
H      -4.792191   -1.228131    1.395070 
H      -5.018534    0.534382    1.332500 
H      -2.542596   -0.952772    3.668309 
H      -1.168317   -1.024494    2.529570 
H      -2.531883   -2.142118    2.343182 
H      -2.960845    1.458786    3.246427 
H      -2.975635    2.111271    1.596608 
H      -1.484149    1.407006    2.252908 
H      -4.005137    2.260780   -2.010945 
H      -2.543511    2.321047   -1.001760 
H      -4.135697    2.058606   -0.255751 
H      -3.131150    0.456809   -3.468304 
H      -2.444046   -1.031046   -2.774899 
H      -1.575214    0.494236   -2.589049 
H      -5.193144   -0.065909   -2.361850 
H      -5.379967   -0.123040   -0.605425 
H      -4.585620   -1.463721   -1.453431 
H      -2.210545   -4.566844   -0.472060 
H       2.114400   -4.602760   -0.516612 
H      -0.059952   -5.831088   -0.625172 
H       0.048760    2.505404    1.148401 
C       0.026632    2.980113   -2.110513 
H       0.950090    5.117016   -0.636001 
H       0.133736    5.922377    1.577079 
H      -0.781658    4.430029    1.822099 
H       0.992131    4.391650    1.792548 
H      -0.815011    3.513709   -2.565446 
H       0.944040    3.377704   -2.559210 
H      -0.049832    1.915197   -2.325497 

80
REACTION D. E_ISOMER, B3LYP-D3BJ, 
G_raw (298.15 K) =         -2012.391685 Hartree
C       1.144192   -4.070006   -0.331496 
C      -0.078706   -4.742725   -0.370270 
C      -1.280242   -4.035229   -0.296974 
C      -1.231211   -2.649189   -0.190457 
C      -0.035339   -1.915229   -0.156382 
C       1.137379   -2.683314   -0.224489 
O      -2.428491   -1.945294   -0.110715 
P      -2.251899   -0.271446    0.043886 
C      -3.098345   -0.001426    1.706882 
C      -2.929758    1.470501    2.114572 
Ir     -0.002813    0.107093   -0.008124 
N       0.058674    2.214112    0.186222 
C       0.062276    3.219683   -0.610414 
C       0.123491    4.649101   -0.128546 
H      -0.749346    5.170925   -0.539337 
O       2.357052   -2.014407   -0.177985 
P       2.232774   -0.343353    0.027169 
C       3.313374    0.199058   -1.415542 
C       3.588908    1.704602   -1.289685 
C      -3.314450    0.251603   -1.421431 
C      -4.659116   -0.480456   -1.531310 
C      -3.522632    1.772122   -1.374055 
C      -2.464894   -0.123096   -2.652817 
C       3.083528   -0.137490    1.698926 
C       2.887129    1.311525    2.172586 
C       4.570190   -0.507231    1.714977 
C       2.318080   -1.075758    2.652287 
C      -4.576676   -0.402894    1.748129 
C      -2.306412   -0.879804    2.695377 
C       4.623172   -0.587640   -1.566281 
C       2.447931   -0.075215   -2.662065 
C       0.188100    4.847017    1.384001 
H       5.066349   -0.353573   -2.540200 
H       4.437568   -1.661560   -1.528071 
H       5.356321   -0.333855   -0.803673 
H       2.982544    0.270171   -3.553154 
H       1.484497    0.430516   -2.603081 
H       2.251741   -1.143541   -2.770984 
H       4.023485    2.077355   -2.222654 
H       4.297573    1.918897   -0.486985 
H       2.671994    2.265672   -1.095821 
H       4.923222   -0.525158    2.751594 
H       5.179005    0.219637    1.175718 
H       4.740596   -1.496034    1.286383 
H       2.675636   -0.913839    3.674379 
H       2.477786   -2.122507    2.391351 
H       1.244911   -0.878147    2.616115 
H       3.338358    1.431682    3.162851 
H       1.824691    1.545275    2.254577 
H       3.351339    2.039507    1.504858 
H      -4.918155   -0.403954    2.788742 
H      -4.730274   -1.404606    1.343868 
H      -5.206871    0.297983    1.199512 
H      -2.671482   -0.692201    3.710398 
H      -1.240369   -0.648261    2.650802 
H      -2.431182   -1.940261    2.473187 
H      -3.354503    1.619087    3.112676 
H      -3.436060    2.155252    1.432377 
H      -1.873373    1.740333    2.152261 
H      -3.943319    2.113657   -2.325252 
H      -2.581832    2.302017   -1.212240 
H      -4.219298    2.059409   -0.584160 
H      -2.973397    0.221792   -3.559108 
H      -2.335122   -1.204705   -2.720732 
H      -1.471103    0.322297   -2.605685 
H      -5.089365   -0.284872   -2.519417 
H      -5.380193   -0.145625   -0.788347 
H      -4.525936   -1.557835   -1.427695 
H      -2.236731   -4.543320   -0.319232 
H       2.085032   -4.604823   -0.379965 
H      -0.095382   -5.823243   -0.453982 
H       0.107017    2.502206    1.161399 
C       0.010096    3.007467   -2.090818 
H       0.989169    5.121716   -0.608460 
H       0.229326    5.911069    1.622586 
H      -0.693216    4.434060    1.882598 
H       1.077798    4.380001    1.815333 
H      -0.824755    3.561234   -2.530128 
H       0.925584    3.381890   -2.559548 
H      -0.096392    1.947023   -2.308169 

80
REACTION D. E_ISOMER, B3LYP-D3, 
G_raw (298.15 K) =   -2012.298866 Hartree
C       1.084538   -4.086622   -0.327525 
C      -0.146661   -4.744563   -0.360149 
C      -1.338558   -4.020994   -0.284388 
C      -1.271621   -2.635238   -0.180231 
C      -0.066559   -1.914429   -0.149677 
C       1.095557   -2.699506   -0.222864 
O      -2.462154   -1.919373   -0.101377 
P      -2.262101   -0.248026    0.044813 
C      -3.113215    0.041477    1.712724 
C      -2.907333    1.509422    2.127428 
Ir     -0.006837    0.107144   -0.007079 
N       0.096525    2.226716    0.182104 
C       0.117929    3.241350   -0.604141 
C       0.229194    4.667164   -0.112737 
H      -0.644384    5.211830   -0.492131 
O       2.326501   -2.049838   -0.186358 
P       2.225243   -0.378761    0.020842 
C       3.320884    0.152598   -1.426924 
C       3.631882    1.652775   -1.292141 
C      -3.321633    0.281189   -1.432486 
C      -4.682731   -0.427717   -1.534549 
C      -3.502553    1.807830   -1.402389 
C      -2.482668   -0.122654   -2.665472 
C       3.086421   -0.182132    1.699770 
C       2.884955    1.264276    2.188485 
C       4.578370   -0.540996    1.707054 
C       2.334089   -1.135978    2.652291 
C      -4.605086   -0.317657    1.745532 
C      -2.354170   -0.864256    2.706551 
C       4.615526   -0.663558   -1.584369 
C       2.451480   -0.092809   -2.680004 
C       0.349557    4.858874    1.398989 
H       5.066429   -0.427985   -2.554869 
H       4.407016   -1.734182   -1.559701 
H       5.355312   -0.435914   -0.819555 
H       3.005156    0.227758   -3.569394 
H       1.509101    0.453208   -2.634226 
H       2.213278   -1.153225   -2.788713 
H       4.083560    2.018373   -2.220359 
H       4.339706    1.848955   -0.483285 
H       2.726662    2.236259   -1.104942 
H       4.939843   -0.551045    2.741307 
H       5.178367    0.188314    1.160143 
H       4.754635   -1.531074    1.282347 
H       2.702191   -0.984313    3.672765 
H       2.496141   -2.179840    2.378899 
H       1.258900   -0.944737    2.634244 
H       3.349443    1.379961    3.173671 
H       1.822154    1.491511    2.289268 
H       3.335094    2.002987    1.521672 
H      -4.954432   -0.304341    2.783835 
H      -4.786060   -1.316512    1.343993 
H      -5.211423    0.399569    1.190230 
H      -2.728715   -0.675828    3.718527 
H      -1.281699   -0.659078    2.683111 
H      -2.501446   -1.920555    2.475644 
H      -3.339061    1.667132    3.121700 
H      -3.388213    2.211463    1.443165 
H      -1.844231    1.751421    2.178362 
H      -3.934023    2.143919   -2.351269 
H      -2.549170    2.323529   -1.265412 
H      -4.181162    2.120101   -0.605344 
H      -2.996762    0.208311   -3.574439 
H      -2.359537   -1.206613   -2.716026 
H      -1.485735    0.318639   -2.640325 
H      -5.109757   -0.233777   -2.524809 
H      -5.399325   -0.071506   -0.796838 
H      -4.572121   -1.507166   -1.420437 
H      -2.302878   -4.514697   -0.303292 
H       2.019885   -4.631156   -0.379130 
H      -0.177373   -5.825289   -0.441750 
H       0.167694    2.503524    1.159509 
C       0.042758    3.053638   -2.089209 
H       1.089637    5.121738   -0.619447 
H       0.429044    5.921105    1.637425 
H      -0.526563    4.470854    1.926465 
H       1.239487    4.365195    1.799927 
H      -0.756312    3.668162   -2.514653 
H       0.979026    3.377269   -2.555666 
H      -0.130608    2.007216   -2.330175 

80
REACTION D. E_ISOMER, B3LYP, 
G_raw (298.15 K) =   -2012.174257 Hartree
C       1.197164   -4.059152   -0.206240 
C      -0.015530   -4.748982   -0.230337 
C      -1.223777   -4.052770   -0.180461 
C      -1.190268   -2.662673   -0.112056 
C      -0.006598   -1.908055   -0.095087 
C       1.172334   -2.668993   -0.137135 
O      -2.400436   -1.980441   -0.056461 
P      -2.268574   -0.300535    0.032999 
C      -3.182185    0.001412    1.681386 
C      -3.120233    1.497245    2.039473 
Ir     -0.000412    0.119078   -0.008066 
N       0.011498    2.256671    0.166304 
C       0.010233    3.286130   -0.601594 
C       0.020764    4.709677   -0.084084 
H      -0.854692    5.217079   -0.508311 
O       2.387094   -1.993251   -0.106039 
P       2.265546   -0.315772    0.024547 
C       3.366977    0.145371   -1.464707 
C       3.741026    1.636387   -1.404609 
C      -3.351108    0.131945   -1.479778 
C      -4.630744   -0.715135   -1.604541 
C      -3.704989    1.629037   -1.470255 
C      -2.460962   -0.179306   -2.702865 
C       3.162913   -0.051239    1.688907 
C       3.043327    1.427116    2.102435 
C       4.638077   -0.481468    1.703240 
C       2.386950   -0.911959    2.708654 
C      -4.640595   -0.483398    1.702509 
C      -2.382101   -0.789795    2.738224 
C       4.636192   -0.715899   -1.602253 
C       2.486311   -0.117058   -2.705746 
C       0.044071    4.894984    1.432932 
H       5.089810   -0.518206   -2.580212 
H       4.399079   -1.779005   -1.550322 
H       5.385831   -0.490671   -0.845652 
H       3.042760    0.166996   -3.605971 
H       1.555752    0.450043   -2.671597 
H       2.225696   -1.174296   -2.788462 
H       4.206517    1.932663   -2.350920 
H       4.459188    1.847343   -0.608978 
H       2.864743    2.271206   -1.253270 
H       5.003528   -0.463176    2.736248 
H       5.272880    0.191762    1.124577 
H       4.765983   -1.497018    1.324537 
H       2.770399   -0.705518    3.713940 
H       2.510550   -1.977449    2.508564 
H       1.319071   -0.685202    2.685166 
H       3.507138    1.563825    3.085451 
H       1.997143    1.728267    2.182903 
H       3.543622    2.103049    1.405957 
H      -5.010187   -0.455601    2.733800 
H      -4.729491   -1.510659    1.344869 
H      -5.297131    0.153476    1.107487 
H      -2.804444   -0.587280    3.728667 
H      -1.330573   -0.496351    2.737648 
H      -2.433645   -1.864924    2.558874 
H      -3.563709    1.648159    3.029751 
H      -3.670409    2.123054    1.334404 
H      -2.088202    1.850786    2.079378 
H      -4.142686    1.904940   -2.435815 
H      -2.824003    2.256070   -1.314392 
H      -4.440004    1.871730   -0.699669 
H      -3.002981    0.088384   -3.616796 
H      -2.215629   -1.242150   -2.753759 
H      -1.521831    0.373874   -2.673062 
H      -5.070216   -0.544229   -2.593918 
H      -5.385470   -0.453111   -0.864833 
H      -4.410404   -1.779279   -1.513835 
H      -2.175290   -4.571338   -0.191878 
H       2.145583   -4.582564   -0.237346 
H      -0.018969   -5.831914   -0.284710 
H       0.022540    2.522781    1.149719 
C      -0.001020    3.125694   -2.092212 
H       0.884283    5.214627   -0.534814 
H       0.051475    5.958954    1.677759 
H      -0.837162    4.458489    1.911382 
H       0.936022    4.451715    1.884357 
H      -0.864749    3.639812   -2.525946 
H       0.891791    3.583384   -2.530858 
H      -0.033490    2.071237   -2.359139 

80
REACTION D. E_ISOMER, M06L-D3, 
G_raw (298.15 K) =        -2011.995809 Hartree
C       1.080558   -4.081288   -0.342187 
C      -0.148391   -4.736864   -0.375121 
C      -1.337477   -4.014030   -0.304026 
C      -1.270322   -2.629543   -0.205467 
C      -0.067078   -1.905949   -0.178321 
C       1.092740   -2.695233   -0.244496 
O      -2.457778   -1.919729   -0.133245 
P      -2.244756   -0.258686    0.037863 
C      -3.058969    0.025928    1.711667 
C      -2.697177    1.439670    2.175670 
Ir     -0.006669    0.104267   -0.029480 
N       0.103234    2.243571    0.182733 
C       0.129564    3.260273   -0.605766 
C       0.243940    4.675590   -0.116666 
H      -0.610038    5.235522   -0.521261 
O       2.320349   -2.052254   -0.211978 
P       2.206825   -0.389601    0.015812 
C       3.324726    0.160652   -1.388885 
C       3.631040    1.647987   -1.210762 
C      -3.331811    0.291014   -1.393208 
C      -4.673748   -0.432802   -1.503996 
C      -3.533861    1.802992   -1.302608 
C      -2.507412   -0.051960   -2.641775 
C       3.035562   -0.203052    1.698375 
C       2.733259    1.204757    2.220007 
C       4.537504   -0.463804    1.716114 
C       2.334396   -1.217572    2.608854 
C      -4.570466   -0.171714    1.744559 
C      -2.395568   -0.980071    2.659768 
C       4.612791   -0.647526   -1.545944 
C       2.478129   -0.048748   -2.651873 
C       0.328795    4.853788    1.386193 
H       5.075396   -0.398835   -2.508307 
H       4.409852   -1.720507   -1.544244 
H       5.349309   -0.435301   -0.771656 
H       3.038973    0.293255   -3.529362 
H       1.530873    0.494901   -2.603760 
H       2.237291   -1.106155   -2.795492 
H       4.102018    2.046371   -2.116612 
H       4.320440    1.827861   -0.380028 
H       2.720499    2.229292   -1.025556 
H       4.893438   -0.465131    2.753005 
H       5.100460    0.307956    1.184752 
H       4.786908   -1.436205    1.283367 
H       2.650851   -1.055205    3.645300 
H       2.580212   -2.245457    2.333364 
H       1.246365   -1.105557    2.556378 
H       3.210946    1.348274    3.195953 
H       1.654428    1.338169    2.351169 
H       3.096518    1.995525    1.555846 
H      -4.918358   -0.129561    2.783308 
H      -4.863876   -1.143715    1.339696 
H      -5.103972    0.609034    1.196260 
H      -2.703161   -0.765562    3.689361 
H      -1.303933   -0.913915    2.602698 
H      -2.682810   -2.007321    2.425185 
H      -3.147441    1.633949    3.155756 
H      -3.048519    2.217989    1.490970 
H      -1.612173    1.541548    2.275147 
H      -3.989807    2.178243   -2.225763 
H      -2.583698    2.330317   -1.162986 
H      -4.197588    2.078491   -0.477376 
H      -3.028206    0.309209   -3.535971 
H      -2.374389   -1.132844   -2.741241 
H      -1.508973    0.393102   -2.607602 
H      -5.114281   -0.219628   -2.484988 
H      -5.395577   -0.114444   -0.752411 
H      -4.549459   -1.514974   -1.426236 
H      -2.303004   -4.508677   -0.322899 
H       2.016468   -4.627971   -0.390488 
H      -0.179821   -5.818815   -0.452292 
H       0.171165    2.529521    1.160037 
C       0.058136    3.053951   -2.078674 
H       1.118000    5.126001   -0.607318 
H       0.407354    5.909939    1.647397 
H      -0.559152    4.461790    1.892003 
H       1.204585    4.350664    1.807487 
H      -0.730655    3.667735   -2.525407 
H       0.996453    3.358196   -2.556398 
H      -0.123844    2.000841   -2.299841 

80
REACTION D. E_ISOMER, M06L, 
G_raw (298.15 K) =        -2011.984418 Hartree
C       1.081247   -4.081431   -0.335689 
C      -0.147496   -4.737268   -0.368727 
C      -1.336590   -4.014403   -0.299190 
C      -1.269627   -2.629806   -0.201750 
C      -0.066594   -1.905834   -0.174025 
C       1.093202   -2.695269   -0.239160 
O      -2.457399   -1.920444   -0.131815 
P      -2.245530   -0.259167    0.037670 
C      -3.066813    0.026203    1.708436 
C      -2.712445    1.441929    2.171962 
Ir     -0.006589    0.104556   -0.026867 
N       0.102498    2.245387    0.184302 
C       0.129383    3.261867   -0.604523 
C       0.242789    4.677730   -0.116266 
H      -0.610347    5.237391   -0.523038 
O       2.320855   -2.052542   -0.207445 
P       2.207893   -0.389389    0.016310 
C       3.324288    0.156549   -1.392157 
C       3.634479    1.643492   -1.217902 
C      -3.330416    0.288140   -1.396847 
C      -4.670364   -0.439049   -1.511275 
C      -3.537428    1.799489   -1.307134 
C      -2.502813   -0.052855   -2.643819 
C       3.042440   -0.198728    1.696027 
C       2.740856    1.209952    2.215712 
C       4.544834   -0.457560    1.709594 
C       2.346493   -1.212339    2.611499 
C      -4.577813   -0.176561    1.736070 
C      -2.404386   -0.976098    2.661130 
C       4.610923   -0.654010   -1.549939 
C       2.475932   -0.054181   -2.653718 
C       0.324974    4.857934    1.386530 
H       5.071296   -0.408722   -2.514268 
H       4.406707   -1.726706   -1.544529 
H       5.349840   -0.440284   -0.778400 
H       3.035626    0.287193   -3.532231 
H       1.528415    0.489005   -2.605137 
H       2.235650   -1.111896   -2.796103 
H       4.105386    2.038294   -2.125383 
H       4.325649    1.823329   -0.388628 
H       2.726028    2.228048   -1.032921 
H       4.903974   -0.454945    2.745417 
H       5.105260    0.313095    1.173997 
H       4.794134   -1.431108    1.279465 
H       2.666513   -1.046608    3.646354 
H       2.593921   -2.240324    2.337834 
H       1.258008   -1.103268    2.563053 
H       3.220362    1.355067    3.190573 
H       1.662307    1.343955    2.348420 
H       3.103138    1.999522    1.549575 
H      -4.929339   -0.134999    2.773653 
H      -4.866677   -1.149755    1.330838 
H      -5.112120    0.602187    1.185761 
H      -2.717957   -0.761099    3.688865 
H      -1.312719   -0.906458    2.609561 
H      -2.687212   -2.004638    2.426825 
H      -3.165993    1.634653    3.150897 
H      -3.066309    2.218033    1.486102 
H      -1.628268    1.549605    2.274255 
H      -3.989932    2.173189   -2.232637 
H      -2.589880    2.330249   -1.162594 
H      -4.206507    2.072563   -0.485420 
H      -3.022913    0.307398   -3.538843 
H      -2.367771   -1.133512   -2.743341 
H      -1.505310    0.394140   -2.608071 
H      -5.108416   -0.227054   -2.493652 
H      -5.395301   -0.122178   -0.762103 
H      -4.543805   -1.520891   -1.432910 
H      -2.302023   -4.509222   -0.318536 
H       2.017202   -4.628114   -0.383146 
H      -0.178760   -5.819320   -0.445027 
H       0.169141    2.532013    1.161544 
C       0.059601    3.055389   -2.077568 
H       1.117658    5.127781   -0.605831 
H       0.403417    5.914505    1.646262 
H      -0.564088    4.467153    1.891338 
H       1.199862    4.355222    1.810225 
H      -0.732293    3.665235   -2.524301 
H       0.996417    3.364773   -2.554943 
H      -0.117162    2.001538   -2.299380 

80
REACTION D. E_ISOMER, M11L, 
G_raw (298.15 K) =       -2011.994613
C       1.023196   -4.036752   -0.243583 
C      -0.205929   -4.673080   -0.254053 
C      -1.379768   -3.942855   -0.196219 
C      -1.295624   -2.567003   -0.130074 
C      -0.093464   -1.861755   -0.124004 
C       1.048069   -2.658518   -0.178426 
O      -2.450541   -1.851032   -0.075403 
P      -2.247268   -0.224048    0.036296 
C      -3.088538    0.095850    1.667918 
C      -2.764576    1.512646    2.104561 
Ir     -0.011840    0.126631   -0.025177 
N       0.132275    2.234039    0.162882 
C       0.185828    3.263657   -0.582563 
C       0.361451    4.646308   -0.050754 
H      -0.481590    5.257447   -0.418761 
O       2.257001   -2.034386   -0.172299 
P       2.189159   -0.404660    0.008208 
C       3.296513    0.054534   -1.416600 
C       3.689735    1.513805   -1.310632 
C      -3.299380    0.253780   -1.424518 
C      -4.625877   -0.473398   -1.529689 
C      -3.505954    1.754241   -1.433701 
C      -2.456882   -0.155207   -2.623994 
C       3.042150   -0.216934    1.657728 
C       2.812743    1.196846    2.161641 
C       4.518335   -0.543271    1.668710 
C       2.321292   -1.179535    2.587761 
C      -4.584969   -0.122444    1.686268 
C      -2.438528   -0.871581    2.643779 
C       4.524727   -0.820365   -1.579242 
C       2.419093   -0.145272   -2.643802 
C       0.488175    4.765949    1.440933 
H       4.971397   -0.627522   -2.568186 
H       4.270769   -1.886772   -1.536774 
H       5.303919   -0.620896   -0.836531 
H       2.997873    0.089639   -3.551652 
H       1.525082    0.493030   -2.622209 
H       2.071308   -1.185284   -2.728039 
H       4.157762    1.846932   -2.250575 
H       4.416813    1.697369   -0.506184 
H       2.817038    2.161337   -1.130732 
H       4.880591   -0.556492    2.709561 
H       5.121892    0.200401    1.131706 
H       4.724278   -1.534347    1.241712 
H       2.655444   -1.003632    3.622431 
H       2.533091   -2.227688    2.337454 
H       1.230540   -1.037891    2.549693 
H       3.338031    1.340972    3.119219 
H       1.742114    1.373679    2.342249 
H       3.174777    1.973782    1.470998 
H      -4.944900   -0.077100    2.726923 
H      -4.864843   -1.107041    1.287604 
H      -5.130934    0.649955    1.127544 
H      -2.763182   -0.627050    3.667565 
H      -1.340378   -0.808423    2.607307 
H      -2.721961   -1.912301    2.438535 
H      -3.244018    1.721002    3.074390 
H      -3.116964    2.276039    1.395134 
H      -1.680125    1.644211    2.232326 
H      -3.929977    2.071556   -2.399639 
H      -2.559288    2.300441   -1.294328 
H      -4.204997    2.084126   -0.651584 
H      -2.983027    0.118500   -3.552527 
H      -2.285762   -1.241471   -2.642567 
H      -1.469256    0.324352   -2.623080 
H      -5.024314   -0.343607   -2.548919 
H      -5.387657   -0.093155   -0.841328 
H      -4.512017   -1.551617   -1.360466 
H      -2.353835   -4.431239   -0.199640 
H       1.956648   -4.598249   -0.284861 
H      -0.249192   -5.761801   -0.305562 
H       0.222479    2.501487    1.144228 
C       0.091999    3.119288   -2.051132 
H       1.243748    5.085333   -0.550231 
H       0.614334    5.812448    1.740344 
H      -0.404688    4.390429    1.962080 
H       1.358726    4.215087    1.827396 
H      -0.676968    3.786619   -2.466962 
H       1.040379    3.406959   -2.530443 
H      -0.136371    2.081947   -2.319954 

80
REACTION D. E_ISOMER, PBE0, 
G_raw (298.15 K) =   -2010.383689 Hartree
C       1.175657   -4.040252   -0.271007 
C      -0.036806   -4.722133   -0.304921 
C      -1.239233   -4.024383   -0.245296 
C      -1.200929   -2.638546   -0.158045 
C      -0.016432   -1.890227   -0.131408 
C       1.157157   -2.654128   -0.183169 
O      -2.397413   -1.956813   -0.092838 
P      -2.238982   -0.290756    0.037313 
C      -3.104887   -0.015203    1.688167 
C      -2.957419    1.452288    2.094462 
Ir     -0.001244    0.119790   -0.014948 
N       0.028776    2.220469    0.168136 
C       0.024339    3.239547   -0.608819 
C       0.053776    4.656269   -0.101520 
H      -0.823223    5.168891   -0.517674 
O       2.363928   -1.988324   -0.142862 
P       2.230122   -0.324563    0.025991 
C       3.322152    0.173291   -1.424458 
C       3.651949    1.662854   -1.326619 
C      -3.317568    0.185929   -1.431512 
C      -4.621796   -0.604594   -1.548761 
C      -3.600503    1.687732   -1.394216 
C      -2.455719   -0.151562   -2.656084 
C       3.094240   -0.091121    1.685248 
C       2.910891    1.357810    2.141751 
C       4.574077   -0.465508    1.699351 
C       2.339020   -1.007138    2.656656 
C      -4.574679   -0.427411    1.720059 
C      -2.322903   -0.877674    2.687283 
C       4.601116   -0.653120   -1.572364 
C       2.451687   -0.087911   -2.661228 
C       0.096980    4.836455    1.406344 
H       5.049552   -0.431999   -2.548418 
H       4.383485   -1.722430   -1.536623 
H       5.347016   -0.423809   -0.811901 
H       2.998050    0.227698   -3.558087 
H       1.503392    0.451481   -2.610231 
H       2.219681   -1.151760   -2.759546 
H       4.106308    1.998643   -2.265869 
H       4.366160    1.869832   -0.524677 
H       2.755136    2.265258   -1.153007 
H       4.929895   -0.466886    2.736567 
H       5.187605    0.250317    1.147126 
H       4.740955   -1.464351    1.289264 
H       2.699898   -0.820737    3.674905 
H       2.501896   -2.061174    2.421350 
H       1.262792   -0.813746    2.620954 
H       3.374001    1.485363    3.127175 
H       1.848937    1.598280    2.235676 
H       3.372423    2.079523    1.462633 
H      -4.922380   -0.421322    2.759997 
H      -4.719521   -1.436209    1.326296 
H      -5.210373    0.264067    1.162323 
H      -2.694364   -0.675900    3.698788 
H      -1.254161   -0.647336    2.648085 
H      -2.447665   -1.942998    2.480995 
H      -3.398417    1.595678    3.087799 
H      -3.461416    2.135744    1.406579 
H      -1.902761    1.733000    2.150511 
H      -4.036576    2.000577   -2.349952 
H      -2.686720    2.268193   -1.236166 
H      -4.314889    1.947810   -0.608304 
H      -2.983636    0.162164   -3.564467 
H      -2.272452   -1.227300   -2.721616 
H      -1.482914    0.343653   -2.616078 
H      -5.057211   -0.417799   -2.537780 
H      -5.363890   -0.312714   -0.806071 
H      -4.440448   -1.677549   -1.458655 
H      -2.193832   -4.538829   -0.263424 
H       2.123005   -4.566903   -0.308842 
H      -0.044654   -5.805040   -0.374219 
H       0.059225    2.502150    1.146394 
C      -0.008274    3.062028   -2.088597 
H       0.915429    5.152471   -0.566849 
H       0.113844    5.899020    1.657497 
H      -0.782059    4.402722    1.893337 
H       0.992252    4.385398    1.845423 
H      -0.849645    3.610893   -2.524190 
H       0.903262    3.468467   -2.540358 
H      -0.091248    2.003552   -2.334384 

80
REACTION D. E_ISOMER, PBE0-D3, 
G_raw (298.15 K) =   -2010.464201 Hartree
C       1.113411   -4.056165   -0.333729 
C      -0.109720   -4.720135   -0.365087 
C      -1.302895   -4.006994   -0.289291 
C      -1.245528   -2.623346   -0.187384 
C      -0.048726   -1.894355   -0.159796 
C       1.115381   -2.671543   -0.231139 
O      -2.430873   -1.922587   -0.108002 
P      -2.235206   -0.261105    0.042841 
C      -3.064484    0.015475    1.703865 
C      -2.852786    1.471194    2.123772 
Ir     -0.003898    0.112772   -0.018038 
N       0.077976    2.201621    0.174480 
C       0.084569    3.216702   -0.607135 
C       0.170678    4.631008   -0.104134 
H      -0.705271    5.168039   -0.490630 
O       2.331171   -2.019581   -0.194786 
P       2.208048   -0.360452    0.020539 
C       3.296144    0.183317   -1.404290 
C       3.582765    1.677903   -1.258439 
C      -3.300965    0.262497   -1.408731 
C      -4.645710   -0.456936   -1.511939 
C      -3.492453    1.778162   -1.362957 
C      -2.463843   -0.122940   -2.636677 
C       3.047048   -0.169516    1.690689 
C       2.821247    1.260216    2.187263 
C       4.533762   -0.509998    1.706750 
C       2.297767   -1.134786    2.618493 
C      -4.546497   -0.344108    1.749902 
C      -2.293469   -0.889857    2.673615 
C       4.591772   -0.612692   -1.563484 
C       2.432781   -0.066874   -2.648748 
C       0.267905    4.800967    1.402519 
H       5.041226   -0.364259   -2.532234 
H       4.393356   -1.686576   -1.549128 
H       5.328619   -0.384167   -0.794302 
H       2.976418    0.272944   -3.538208 
H       1.476907    0.458216   -2.590297 
H       2.215294   -1.132137   -2.765001 
H       4.022894    2.060229   -2.186327 
H       4.292596    1.877272   -0.450566 
H       2.667061    2.243580   -1.059057 
H       4.884484   -0.531461    2.745279 
H       5.131450    0.235102    1.176352 
H       4.724765   -1.492902    1.269213 
H       2.639760   -0.977398    3.647924 
H       2.486030   -2.175795    2.346584 
H       1.217818   -0.963573    2.573755 
H       3.272670    1.373121    3.179681 
H       1.751625    1.465655    2.276670 
H       3.266464    2.013353    1.531585 
H      -4.882320   -0.342102    2.793518 
H      -4.731319   -1.340286    1.340550 
H      -5.161275    0.379214    1.209531 
H      -2.642475   -0.698163    3.694868 
H      -1.218935   -0.689332    2.620438 
H      -2.451904   -1.946471    2.446298 
H      -3.276865    1.623331    3.123005 
H      -3.333988    2.181485    1.446737 
H      -1.786166    1.704382    2.168523 
H      -3.918091    2.123070   -2.312117 
H      -2.541777    2.297764   -1.210560 
H      -4.180434    2.075832   -0.566927 
H      -2.975038    0.219431   -3.543999 
H      -2.339948   -1.207360   -2.699504 
H      -1.464498    0.316819   -2.598486 
H      -5.078136   -0.256548   -2.499387 
H      -5.365109   -0.119087   -0.766580 
H      -4.520090   -1.537325   -1.412288 
H      -2.264808   -4.507470   -0.306366 
H       2.053322   -4.594732   -0.384682 
H      -0.133206   -5.802016   -0.445550 
H       0.144534    2.483798    1.150445 
C       0.015205    3.031492   -2.084358 
H       1.031092    5.102488   -0.596697 
H       0.327944    5.860156    1.660449 
H      -0.609552    4.391396    1.913144 
H       1.160949    4.315314    1.808696 
H      -0.793880    3.631887   -2.512169 
H       0.946830    3.370198   -2.550703 
H      -0.139889    1.978905   -2.319582 

80
REACTION D. E_ISOMER, PBE-D2, 
G_raw (298.15 K) =   -2010.365356 Hartree
C       1.193349   -4.065769   -0.536680 
C      -0.028673   -4.750391   -0.610202 
C      -1.243021   -4.054548   -0.517448 
C      -1.209466   -2.665685   -0.360929 
C      -0.013270   -1.913137   -0.294923 
C       1.174758   -2.676716   -0.380157 
O      -2.423546   -1.984268   -0.263532 
P      -2.218162   -0.316610    0.029334 
C      -2.910869   -0.142942    1.774993 
C      -2.472869    1.233062    2.307780 
Ir     -0.001383    0.097931   -0.078869 
N       0.020371    2.189828    0.147534 
C       0.023881    3.207931   -0.656442 
C       0.044313    4.636808   -0.168920 
H      -0.832600    5.148949   -0.607246 
O       2.396803   -2.006606   -0.301274 
P       2.211049   -0.342953    0.022113 
C       3.384640    0.339973   -1.274927 
C       3.560332    1.839675   -0.988717 
C      -3.387946    0.350199   -1.279932 
C      -4.753284   -0.349325   -1.359477 
C      -3.539024    1.859359   -1.032206 
C      -2.637269    0.106762   -2.604210 
C       2.908871   -0.206697    1.769525 
C       2.475193    1.159740    2.329789 
C       4.427015   -0.379789    1.885869 
C       2.190843   -1.311842    2.567748 
C      -4.429109   -0.309857    1.898151 
C      -2.192542   -1.233481    2.592818 
C       4.738558   -0.378045   -1.379524 
C       2.624332    0.146260   -2.601994 
C       0.063560    4.823816    1.349279 
H       5.253906   -0.022461   -2.289700 
H       4.594034   -1.465252   -1.469872 
H       5.393104   -0.176932   -0.521564 
H       3.202160    0.615188   -3.418463 
H       1.621681    0.597550   -2.551402 
H       2.502158   -0.925055   -2.825892 
H       4.091029    2.312958   -1.833363 
H       4.153021    2.010654   -0.075730 
H       2.580835    2.332233   -0.872041 
H       4.700676   -0.414532    2.955502 
H       4.969641    0.462765    1.429091 
H       4.762625   -1.316463    1.415275 
H       2.434380   -1.192836    3.638093 
H       2.507669   -2.312515    2.238248 
H       1.099426   -1.231748    2.430872 
H       2.848311    1.258601    3.364737 
H       1.374285    1.216831    2.340638 
H       2.869012    2.002238    1.738811 
H      -4.700179   -0.327780    2.968859 
H      -4.768987   -1.252021    1.441866 
H      -4.969369    0.528044    1.430239 
H      -2.436080   -1.095642    3.660949 
H      -1.101324   -1.153568    2.453614 
H      -2.508130   -2.240265    2.281094 
H      -2.841654    1.351382    3.342157 
H      -2.867322    2.065409    1.703123 
H      -1.372015    1.289170    2.312927 
H      -4.062560    2.320384   -1.888011 
H      -2.551578    2.338834   -0.927648 
H      -4.128164    2.062528   -0.123294 
H      -3.211186    0.561252   -3.431390 
H      -2.532672   -0.972384   -2.797100 
H      -1.626962    0.542033   -2.571514 
H      -5.264643   -0.015901   -2.280230 
H      -5.403144   -0.109904   -0.507850 
H      -4.626328   -1.441119   -1.414057 
H      -2.202514   -4.573995   -0.563681 
H       2.147327   -4.593801   -0.597601 
H      -0.034643   -5.835805   -0.734990 
H       0.033106    2.489684    1.132068 
C       0.011882    2.988415   -2.136526 
H       0.921074    5.131174   -0.627640 
H       0.078633    5.893596    1.603429 
H      -0.829980    4.380982    1.820135 
H       0.956777    4.360235    1.800340 
H      -0.842453    3.512545   -2.598193 
H       0.928870    3.401102   -2.592259 
H      -0.049807    1.911953   -2.350844 

80
REACTION D. E_ISOMER, PBE-D3BJ, 
G_raw (298.15 K) =        -2010.354943
C       1.084108   -4.091416   -0.372847 
C      -0.152918   -4.749793   -0.408219 
C      -1.348236   -4.022623   -0.321867 
C      -1.280395   -2.630863   -0.206834 
C      -0.068103   -1.905278   -0.176753 
C       1.098664   -2.698368   -0.257238 
O      -2.475808   -1.920214   -0.115516 
P      -2.252278   -0.234341    0.048990 
C      -3.072157    0.034093    1.736839 
C      -2.892032    1.506459    2.141160 
Ir     -0.005657    0.110156   -0.019600 
N       0.109187    2.198490    0.174678 
C       0.123066    3.221382   -0.622041 
C       0.242279    4.641520   -0.121668 
H      -0.630233    5.202003   -0.505058 
O       2.336502   -2.056299   -0.216500 
P       2.214324   -0.372567    0.022281 
C       3.318828    0.184659   -1.410036 
C       3.603977    1.686125   -1.245377 
C      -3.332952    0.309209   -1.409825 
C      -4.694349   -0.396052   -1.495983 
C      -3.503792    1.835570   -1.360353 
C      -2.498613   -0.091665   -2.644440 
C       3.055125   -0.204205    1.716463 
C       2.840161    1.233052    2.220346 
C       4.544996   -0.564249    1.730181 
C       2.282073   -1.172913    2.633604 
C      -4.549532   -0.371469    1.802678 
C      -2.250117   -0.848089    2.698546 
C       4.620818   -0.615784   -1.564820 
C       2.451736   -0.061529   -2.662489 
C       0.356543    4.816978    1.392129 
H       5.076217   -0.368047   -2.539221 
H       4.419693   -1.696160   -1.548784 
H       5.358695   -0.383639   -0.787445 
H       2.987683    0.312113   -3.551949 
H       1.475730    0.439905   -2.587120 
H       2.259541   -1.136202   -2.798891 
H       4.053942    2.080740   -2.172010 
H       4.312055    1.877317   -0.424435 
H       2.681338    2.253286   -1.045083 
H       4.897499   -0.596361    2.775545 
H       5.155315    0.181252    1.200332 
H       4.725229   -1.552907    1.284147 
H       2.621837   -1.029417    3.673424 
H       2.457332   -2.220028    2.349465 
H       1.198415   -0.982203    2.580246 
H       3.281908    1.334656    3.226284 
H       1.764707    1.452111    2.296690 
H       3.307498    1.987757    1.570229 
H      -4.873278   -0.378705    2.857740 
H      -4.710314   -1.379513    1.393997 
H      -5.197329    0.336326    1.266200 
H      -2.581379   -0.656674    3.733397 
H      -1.176081   -0.616721    2.610634 
H      -2.385384   -1.916780    2.479653 
H      -3.282977    1.652282    3.162530 
H      -3.427712    2.197719    1.474402 
H      -1.826081    1.777964    2.140367 
H      -3.938601    2.187724   -2.311181 
H      -2.539724    2.347044   -1.218288 
H      -4.183070    2.143426   -0.551367 
H      -2.991848    0.287751   -3.555581 
H      -2.415620   -1.185646   -2.722601 
H      -1.475900    0.310420   -2.586194 
H      -5.136068   -0.197026   -2.487712 
H      -5.405053   -0.037920   -0.740745 
H      -4.581745   -1.483863   -1.386791 
H      -2.319955   -4.519821   -0.340671 
H       2.025108   -4.641873   -0.430479 
H      -0.185578   -5.837695   -0.499412 
H       0.197629    2.487888    1.157264 
C       0.029539    3.017677   -2.101502 
H       1.112995    5.100336   -0.625674 
H       0.440400    5.882733    1.646856 
H      -0.529606    4.424844    1.916467 
H       1.248874    4.312637    1.796314 
H      -0.792845    3.612981   -2.530447 
H       0.957589    3.351655   -2.595309 
H      -0.128068    1.952058   -2.314093 

80
REACTION D. E_ISOMER, PBE-D3, 
G_raw (298.15 K) =   -2010.302805 Hartree
C       1.087243   -4.092529   -0.360853 
C      -0.149080   -4.752474   -0.393688 
C      -1.344796   -4.025644   -0.309137 
C      -1.277841   -2.633311   -0.198009 
C      -0.066475   -1.905298   -0.169897 
C       1.100498   -2.698921   -0.249145 
O      -2.475281   -1.925321   -0.109040 
P      -2.253839   -0.239236    0.047999 
C      -3.083650    0.036828    1.737464 
C      -2.903552    1.511376    2.139918 
Ir     -0.005586    0.110424   -0.019104 
N       0.106185    2.204605    0.169664 
C       0.119406    3.234274   -0.619206 
C       0.235999    4.652340   -0.107897 
H      -0.638436    5.213116   -0.487171 
O       2.339093   -2.057766   -0.211509 
P       2.216896   -0.373744    0.021076 
C       3.323257    0.178863   -1.420524 
C       3.614763    1.681538   -1.264251 
C      -3.334401    0.297975   -1.421916 
C      -4.694281   -0.413765   -1.510398 
C      -3.512653    1.825162   -1.379386 
C      -2.496237   -0.103977   -2.655639 
C       3.064037   -0.199414    1.719279 
C       2.854820    1.241475    2.220037 
C       4.554914   -0.562915    1.732049 
C       2.292453   -1.164939    2.643739 
C      -4.563933   -0.365329    1.797799 
C      -2.270227   -0.845931    2.708460 
C       4.624354   -0.626499   -1.574864 
C       2.453991   -0.069336   -2.673107 
C       0.351813    4.821438    1.407581 
H       5.081211   -0.381445   -2.549563 
H       4.421649   -1.706812   -1.557633 
H       5.364297   -0.395700   -0.798718 
H       2.993845    0.293052   -3.565223 
H       1.482631    0.442315   -2.605077 
H       2.251507   -1.143134   -2.803764 
H       4.062169    2.070274   -2.194928 
H       4.327803    1.876018   -0.448072 
H       2.695562    2.254612   -1.063458 
H       4.910354   -0.588802    2.776859 
H       5.166961    0.177461    1.196528 
H       4.733162   -1.555273    1.292767 
H       2.640711   -1.022969    3.681293 
H       2.460745   -2.213761    2.360360 
H       1.208841   -0.970911    2.600753 
H       3.301639    1.345744    3.223764 
H       1.780796    1.466478    2.302367 
H       3.321506    1.993853    1.566291 
H      -4.894518   -0.363584    2.851017 
H      -4.725712   -1.376480    1.396534 
H      -5.208125    0.339484    1.252639 
H      -2.613867   -0.656857    3.740035 
H      -1.195261   -0.613747    2.636560 
H      -2.400930   -1.915238    2.488246 
H      -3.301044    1.660923    3.158534 
H      -3.434078    2.203044    1.468999 
H      -1.837479    1.783255    2.146534 
H      -3.944057    2.172309   -2.333906 
H      -2.551860    2.342704   -1.234709 
H      -4.197963    2.134597   -0.575766 
H      -2.996227    0.260971   -3.569417 
H      -2.399288   -1.197676   -2.726241 
H      -1.478434    0.311747   -2.606809 
H      -5.136472   -0.216004   -2.502455 
H      -5.408660   -0.059708   -0.756460 
H      -4.578491   -1.501594   -1.402083 
H      -2.316888   -4.522541   -0.326182 
H       2.029516   -4.641270   -0.417204 
H      -0.180865   -5.840897   -0.481646 
H       0.193031    2.487996    1.154360 
C       0.028507    3.047347   -2.102462 
H       1.105105    5.116471   -0.610337 
H       0.432710    5.886632    1.666398 
H      -0.532530    4.425064    1.932266 
H       1.246553    4.318771    1.809095 
H      -0.791885    3.649664   -2.525885 
H       0.958283    3.386327   -2.590010 
H      -0.130640    1.986019   -2.333517 

80
REACTION D. E_ISOMER, PBE, 
G_raw (298.15 K) =   -2010.226790 Hartree
C       1.182025   -4.071179   -0.256662 
C      -0.038572   -4.758580   -0.289532 
C      -1.249093   -4.055218   -0.230644 
C      -1.211675   -2.659408   -0.145376 
C      -0.018052   -1.902824   -0.120390 
C       1.164457   -2.675084   -0.171048 
O      -2.426213   -1.979005   -0.080461 
P      -2.254053   -0.285805    0.038661 
C      -3.145359   -0.003237    1.705130 
C      -3.076577    1.489141    2.073177 
Ir     -0.002693    0.118078   -0.010922 
N       0.023584    2.224375    0.166363 
C       0.023424    3.260920   -0.614017 
C       0.046676    4.681505   -0.092397 
H      -0.836442    5.200042   -0.509845 
O       2.389176   -2.011037   -0.133082 
P       2.244090   -0.319759    0.027818 
C       3.349227    0.170270   -1.450905 
C       3.689728    1.667617   -1.361639 
C      -3.327891    0.185091   -1.469677 
C      -4.654281   -0.586828   -1.571688 
C      -3.578296    1.702638   -1.468437 
C      -2.452899   -0.199187   -2.682745 
C       3.123550   -0.076356    1.708123 
C       2.973212    1.392862    2.142064 
C       4.602630   -0.489413    1.720981 
C       2.338538   -0.966883    2.694010 
C      -4.599556   -0.497658    1.738653 
C      -2.311853   -0.807464    2.725705 
C       4.630636   -0.670482   -1.589702 
C       2.466048   -0.098980   -2.688538 
C       0.086555    4.857309    1.425937 
H       5.084158   -0.462565   -2.574797 
H       4.406105   -1.745114   -1.540452 
H       5.382341   -0.433561   -0.826471 
H       3.010256    0.216912   -3.595783 
H       1.509990    0.441963   -2.633668 
H       2.234322   -1.170523   -2.782222 
H       4.149158    1.996392   -2.309763 
H       4.410774    1.877301   -0.556539 
H       2.792076    2.282299   -1.191645 
H       4.965882   -0.486524    2.763631 
H       5.236032    0.207878    1.153263 
H       4.743898   -1.503769    1.320468 
H       2.706697   -0.779067    3.717481 
H       2.472376   -2.034483    2.468379 
H       1.260798   -0.742327    2.653501 
H       3.427495    1.523257    3.139581 
H       1.910775    1.669268    2.217229 
H       3.469643    2.094789    1.455426 
H      -4.952541   -0.501663    2.784803 
H      -4.687938   -1.522548    1.350100 
H      -5.275021    0.157146    1.169417 
H      -2.698536   -0.608306    3.740226 
H      -1.250026   -0.517454    2.680615 
H      -2.375745   -1.888785    2.536763 
H      -3.488973    1.630509    3.087197 
H      -3.657036    2.123276    1.386901 
H      -2.035908    1.846415    2.079918 
H      -4.013048    2.002198   -2.437737 
H      -2.644638    2.269203   -1.328902 
H      -4.288823    2.002652   -0.683468 
H      -2.960194    0.120716   -3.609647 
H      -2.298968   -1.287460   -2.731692 
H      -1.459729    0.271989   -2.630461 
H      -5.082934   -0.424331   -2.576197 
H      -5.399627   -0.251420   -0.839269 
H      -4.495684   -1.666858   -1.442920 
H      -2.210309   -4.573079   -0.247699 
H       2.136008   -4.601254   -0.293580 
H      -0.046444   -5.848896   -0.357477 
H       0.047030    2.504412    1.155818 
C       0.001671    3.087281   -2.101972 
H       0.912300    5.190486   -0.555752 
H       0.100256    5.926134    1.682881 
H      -0.797823    4.417627    1.914510 
H       0.987892    4.404595    1.869083 
H      -0.832680    3.651901   -2.550211 
H       0.928118    3.484113   -2.550985 
H      -0.092963    2.022555   -2.352885 

80
REACTION D. Z_ISOMER, B3LYP-D2, 
G_raw (298.15 K) =   -2012.367838 Hartree
C       0.981414   -3.861640   -1.369118 
C      -0.265514   -4.450904   -1.592559 
C      -1.442497   -3.744495   -1.333200 
C      -1.344347   -2.441988   -0.854363 
C      -0.122182   -1.789945   -0.617514 
C       1.023762   -2.556652   -0.889921 
O      -2.516841   -1.740869   -0.591334 
P      -2.260925   -0.195931    0.040442 
C      -3.023114   -0.359352    1.746250 
C      -2.627124    0.881002    2.564043 
Ir     -0.016067    0.112291    0.082786 
N       0.120753    2.103927    0.826374 
C       0.138916    3.271216    0.287098 
C       0.020344    3.411242   -1.202982 
H      -0.910757    3.949917   -1.418900 
O       2.266942   -1.973112   -0.659623 
P       2.175604   -0.452522    0.065945 
C       3.388847    0.481190   -1.004135 
C       3.727102    1.805240   -0.302249 
C      -3.338470    0.781205   -1.132900 
C      -4.725745    0.178481   -1.399541 
C      -3.456742    2.215138   -0.596574 
C      -2.555656    0.776782   -2.461461 
C       2.869570   -0.801432    1.772094 
C       2.567484    0.417374    2.660042 
C       4.363230   -1.139054    1.813401 
C       2.055355   -1.996978    2.302548 
C      -4.543326   -0.548972    1.773772 
C      -2.338666   -1.591004    2.370212 
C       4.666156   -0.293034   -1.361406 
C       2.617205    0.767900   -2.307051 
C       1.196565    4.167805   -1.841432 
H       5.220909    0.277305   -2.116252 
H       4.415538   -1.269227   -1.781868 
H       5.319476   -0.438726   -0.502192 
H       3.247948    1.375245   -2.966931 
H       1.685381    1.297285   -2.104214 
H       2.369126   -0.164537   -2.821135 
H       4.265291    2.455368   -1.001525 
H       4.367560    1.643443    0.568601 
H       2.821523    2.326749    0.022304 
H       4.625887   -1.463004    2.827447 
H       4.980060   -0.270788    1.569617 
H       4.605647   -1.949406    1.121643 
H       2.329537   -2.170749    3.349547 
H       2.262645   -2.902210    1.728064 
H       0.984269   -1.786787    2.239374 
H       2.922400    0.212972    3.676833 
H       1.488220    0.587717    2.691637 
H       3.057946    1.325780    2.301893 
H      -4.847500   -0.815600    2.792957 
H      -4.858674   -1.350086    1.101230 
H      -5.067646    0.370072    1.500740 
H      -2.650985   -1.672537    3.417841 
H      -1.251098   -1.486769    2.323187 
H      -2.619654   -2.506262    1.844902 
H      -3.025163    0.777493    3.580148 
H      -3.022370    1.805040    2.134696 
H      -1.538982    0.957626    2.618116 
H      -3.910844    2.851653   -1.364636 
H      -2.475233    2.625614   -0.345238 
H      -4.090560    2.255609    0.293474 
H      -3.075471    1.420059   -3.181148 
H      -2.504827   -0.235646   -2.870610 
H      -1.533094    1.132121   -2.324468 
H      -5.179525    0.708041   -2.245979 
H      -5.395295    0.275736   -0.546234 
H      -4.638898   -0.878095   -1.662033 
H      -2.417010   -4.190402   -1.494518 
H       1.902804   -4.399746   -1.558673 
H      -0.320133   -5.467310   -1.966416 
H       0.202915    2.162409    1.842373 
C       0.269864    4.527511    1.100741 
H      -0.069777    2.409503   -1.624249 
H       1.058528    4.219599   -2.924303 
H       1.270440    5.189886   -1.459375 
H       2.140191    3.655016   -1.644545 
H       1.207582    5.039087    0.859205 
H      -0.542867    5.220486    0.856838 
H       0.250878    4.315970    2.172684 

80
REACTION D. Z_ISOMER, B3LYP-D3BJ, 
G_raw (298.15 K) =   -2012.388631 Hartree
C       1.033841   -3.843376   -1.342434 
C      -0.204941   -4.455466   -1.543965 
C      -1.388698   -3.769322   -1.266083 
C      -1.305557   -2.463481   -0.793808 
C      -0.093061   -1.788643   -0.586399 
C       1.060720   -2.535953   -0.869374 
O      -2.483953   -1.785298   -0.503701 
P      -2.271480   -0.206860    0.059740 
C      -3.099884   -0.341081    1.748814 
C      -2.907292    0.981893    2.506659 
Ir     -0.010233    0.119723    0.097438 
N       0.095725    2.105187    0.833821 
C       0.088066    3.283067    0.319794 
C      -0.041746    3.449921   -1.167391 
H      -1.018795    3.904800   -1.370649 
O       2.295527   -1.933314   -0.648935 
P       2.208368   -0.409419    0.073111 
C       3.407855    0.502921   -1.051714 
C       3.767594    1.847210   -0.402715 
C      -3.348631    0.678413   -1.206714 
C      -4.686660   -0.012264   -1.507988 
C      -3.576137    2.125581   -0.747226 
C      -2.503808    0.660701   -2.496660 
C       2.948308   -0.777349    1.769135 
C       2.699539    0.439066    2.676061 
C       4.436329   -1.144399    1.763259 
C       2.137918   -1.968894    2.315165 
C      -4.585350   -0.716909    1.703394 
C      -2.321482   -1.448549    2.485681 
C       4.674234   -0.287747   -1.412112 
C       2.609367    0.747474   -2.347039 
C       1.051082    4.316616   -1.807076 
H       5.202291    0.237536   -2.215248 
H       4.419922   -1.286183   -1.769004 
H       5.361445   -0.383626   -0.574245 
H       3.216123    1.341778   -3.038167 
H       1.676900    1.273351   -2.145245 
H       2.357400   -0.196474   -2.834318 
H       4.292690    2.475700   -1.129113 
H       4.426086    1.718061    0.458212 
H       2.875591    2.385624   -0.074895 
H       4.724165   -1.481166    2.764935 
H       5.070534   -0.293055    1.511056 
H       4.645522   -1.956946    1.065587 
H       2.422395   -2.144359    3.357702 
H       2.334293   -2.877432    1.744969 
H       1.066585   -1.765972    2.269515 
H       3.087492    0.228377    3.677943 
H       1.628469    0.632732    2.757897 
H       3.189679    1.343803    2.311629 
H      -4.923490   -0.960510    2.716235 
H      -4.758295   -1.590376    1.072691 
H      -5.204557    0.105823    1.343583 
H      -2.696664   -1.524910    3.511473 
H      -1.254687   -1.219619    2.513605 
H      -2.447494   -2.416058    1.997944 
H      -3.306301    0.876982    3.520741 
H      -3.424654    1.816464    2.031337 
H      -1.848653    1.233176    2.584108 
H      -3.972329    2.717644   -1.578404 
H      -2.647114    2.591978   -0.414332 
H      -4.298150    2.180246    0.069792 
H      -3.018612    1.236840   -3.272457 
H      -2.369423   -0.360244   -2.858980 
H      -1.512091    1.081555   -2.332919 
H      -5.132431    0.452916   -2.393887 
H      -5.401456    0.082793   -0.693175 
H      -4.539094   -1.071658   -1.719505 
H      -2.357296   -4.233526   -1.406950 
H       1.961240   -4.366512   -1.541692 
H      -0.247688   -5.473629   -1.913166 
H       0.176668    2.139812    1.849419 
C       0.188426    4.518797    1.168261 
H      -0.053799    2.450572   -1.603115 
H       0.909115    4.351211   -2.888957 
H       1.027251    5.343695   -1.435805 
H       2.044163    3.907441   -1.614425 
H       1.126216    5.046645    0.970965 
H      -0.622536    5.213234    0.928795 
H       0.145168    4.280158    2.232248 

80
REACTION D. Z_ISOMER, B3LYP-D3, 
G_raw (298.15 K) =   -2012.296530 Hartree
C       1.020226   -3.845146   -1.350276 
C      -0.219914   -4.456750   -1.545453 
C      -1.401092   -3.769067   -1.260107 
C      -1.313990   -2.463746   -0.786216 
C      -0.100010   -1.788603   -0.582517 
C       1.050866   -2.538251   -0.875225 
O      -2.492926   -1.787103   -0.493421 
P      -2.275634   -0.206414    0.059469 
C      -3.113880   -0.326326    1.755502 
C      -2.899404    0.995312    2.515170 
Ir     -0.011544    0.119792    0.098860 
N       0.108527    2.119009    0.833127 
C       0.106202    3.303579    0.331927 
C      -0.036996    3.499239   -1.152970 
H      -0.997797    3.997068   -1.333431 
O       2.290063   -1.939872   -0.664847 
P       2.208024   -0.421698    0.067351 
C       3.415509    0.500578   -1.056150 
C       3.786570    1.837818   -0.392937 
C      -3.355190    0.676377   -1.221129 
C      -4.694137   -0.018863   -1.524144 
C      -3.588185    2.127902   -0.770789 
C      -2.509132    0.654905   -2.513459 
C       2.955040   -0.807719    1.767577 
C       2.704279    0.397917    2.692744 
C       4.447349   -1.168445    1.757032 
C       2.153261   -2.013746    2.302377 
C      -4.608669   -0.673619    1.707210 
C      -2.360818   -1.451112    2.498185 
C       4.678839   -0.293818   -1.431325 
C       2.617005    0.766996   -2.350534 
C       1.081741    4.335898   -1.793376 
H       5.212126    0.243638   -2.223527 
H       4.419384   -1.283807   -1.809205 
H       5.367349   -0.411261   -0.596908 
H       3.235490    1.348925   -3.042666 
H       1.698402    1.317604   -2.148703 
H       2.341326   -0.168962   -2.841622 
H       4.308982    2.472923   -1.116217 
H       4.452252    1.698229    0.461455 
H       2.899521    2.377789   -0.051999 
H       4.739381   -1.508343    2.756914 
H       5.078445   -0.313292    1.508060 
H       4.659869   -1.977734    1.055694 
H       2.446024   -2.203422    3.340641 
H       2.351405   -2.913914    1.718436 
H       1.079377   -1.820068    2.269654 
H       3.096784    0.175150    3.690808 
H       1.632887    0.589142    2.783753 
H       3.191721    1.309751    2.340614 
H      -4.957616   -0.898369    2.721220 
H      -4.797132   -1.550996    1.085486 
H      -5.210137    0.157355    1.335049 
H      -2.750740   -1.526942    3.519051 
H      -1.290426   -1.241299    2.546053 
H      -2.495801   -2.415353    2.005059 
H      -3.307522    0.899078    3.527031 
H      -3.397372    1.841288    2.037735 
H      -1.836328    1.226883    2.600553 
H      -3.995141    2.710880   -1.603818 
H      -2.659007    2.604077   -0.449916 
H      -4.304909    2.186905    0.051410 
H      -3.039773    1.201580   -3.300576 
H      -2.346645   -0.368832   -2.857870 
H      -1.529345    1.108648   -2.364396 
H      -5.142495    0.448580   -2.408078 
H      -5.410961    0.071116   -0.710260 
H      -4.545616   -1.077745   -1.740274 
H      -2.372354   -4.229609   -1.396401 
H       1.947625   -4.366429   -1.555555 
H      -0.265667   -5.474658   -1.916024 
H       0.200707    2.144614    1.848600 
C       0.229413    4.531605    1.192843 
H      -0.092066    2.512720   -1.613682 
H       0.924254    4.398704   -2.872134 
H       1.105528    5.355320   -1.400960 
H       2.060101    3.882149   -1.625584 
H       1.180447    5.038658    1.002580 
H      -0.564221    5.246191    0.954035 
H       0.176633    4.289032    2.255896 

80
REACTION D. Z_ISOMER, B3LYP, 
G_raw (298.15 K) =   -2012.171847 Hartree
C       1.054513   -3.922188   -1.114338 
C      -0.179000   -4.542314   -1.317036 
C      -1.365118   -3.839706   -1.101275 
C      -1.288087   -2.511726   -0.690391 
C      -0.081780   -1.824404   -0.484622 
C       1.072848   -2.592445   -0.702853 
O      -2.476113   -1.826308   -0.465771 
P      -2.294552   -0.228333    0.041633 
C      -3.196475   -0.320165    1.721059 
C      -3.066484    1.029854    2.449978 
Ir     -0.010649    0.115821    0.108356 
N       0.057314    2.134620    0.823410 
C       0.048606    3.334541    0.358707 
C      -0.034942    3.575204   -1.125785 
H      -1.042179    3.955812   -1.340402 
O       2.307197   -1.990300   -0.488451 
P       2.236521   -0.400684    0.071100 
C       3.406117    0.388678   -1.212494 
C       3.871523    1.769109   -0.717813 
C      -3.367377    0.600220   -1.301282 
C      -4.661577   -0.163283   -1.640447 
C      -3.698761    2.047798   -0.897926 
C      -2.480388    0.606085   -2.565579 
C       3.090874   -0.610399    1.765618 
C       3.004760    0.711694    2.550856 
C       4.552755   -1.079986    1.693519 
C       2.266892   -1.681006    2.512297 
C      -4.676401   -0.726824    1.635078 
C      -2.436811   -1.390573    2.533259 
C       4.622995   -0.480663   -1.583117 
C       2.547641    0.558147   -2.484587 
C       0.992004    4.572886   -1.683392 
H       5.132405   -0.021381   -2.437911 
H       4.315655   -1.485798   -1.873649 
H       5.349289   -0.561744   -0.776151 
H       3.149843    1.041354   -3.262199 
H       1.660498    1.163664   -2.297587 
H       2.212468   -0.407921   -2.868287 
H       4.363551    2.303145   -1.537913 
H       4.593166    1.689445    0.098108 
H       3.035117    2.383639   -0.375612 
H       4.895847   -1.329781    2.703872 
H       5.219295   -0.305880    1.309208 
H       4.660366   -1.974376    1.077000 
H       2.645626   -1.770818    3.536412 
H       2.349819   -2.656818    2.030999 
H       1.209718   -1.411562    2.551718 
H       3.433181    0.564555    3.548344 
H       1.967576    1.027360    2.677491 
H       3.555604    1.524296    2.073533 
H      -5.049157   -0.925212    2.646341 
H      -4.813625   -1.636080    1.046843 
H      -5.298783    0.063282    1.211788 
H      -2.848481   -1.425429    3.547959 
H      -1.372281   -1.156337    2.594041 
H      -2.541352   -2.381341    2.087906 
H      -3.513295    0.944072    3.446531 
H      -3.577998    1.842077    1.930151 
H      -2.019113    1.308956    2.577753 
H      -4.126628    2.575515   -1.757276 
H      -2.810071    2.598196   -0.580178 
H      -4.434450    2.090508   -0.091822 
H      -3.013085    1.118372   -3.374536 
H      -2.258885   -0.410417   -2.897794 
H      -1.529569    1.110136   -2.390905 
H      -5.102738    0.278577   -2.541181 
H      -5.408152   -0.104279   -0.850059 
H      -4.458215   -1.214721   -1.846194 
H      -2.332502   -4.306938   -1.243552 
H       1.986152   -4.454395   -1.266619 
H      -0.215951   -5.577140   -1.638718 
H       0.087215    2.136262    1.842684 
C       0.084087    4.534833    1.268327 
H       0.050252    2.607137   -1.621426 
H       0.876656    4.654807   -2.766301 
H       0.863226    5.572743   -1.262188 
H       2.015799    4.249063   -1.482377 
H       1.011149    5.099024    1.129462 
H      -0.739301    5.217308    1.034957 
H       0.012386    4.246451    2.318653 

80
REACTION D. Z_ISOMER, M06L-D3, 
G_raw (298.15 K) =   -2011.992851 Hartree
C       0.979613   -3.790704   -1.477532 
C      -0.263037   -4.369782   -1.727332 
C      -1.437131   -3.669913   -1.457158 
C      -1.341141   -2.382391   -0.943234 
C      -0.122264   -1.735978   -0.681535 
C       1.021318   -2.500719   -0.964147 
O      -2.513373   -1.696660   -0.669416 
P      -2.265186   -0.190469    0.041415 
C      -3.001631   -0.472764    1.753794 
C      -2.579237    0.697388    2.646437 
Ir     -0.018377    0.136727    0.061723 
N       0.120261    2.145916    0.837585 
C       0.167846    3.321748    0.312063 
C       0.059857    3.467447   -1.173229 
H      -0.918199    3.917266   -1.398530 
O       2.261874   -1.936112   -0.709921 
P       2.174349   -0.448395    0.071023 
C       3.457820    0.469884   -0.948450 
C       3.833947    1.756123   -0.212537 
C      -3.413578    0.811068   -1.058200 
C      -4.767554    0.162612   -1.347915 
C      -3.593949    2.195845   -0.436781 
C      -2.654761    0.932388   -2.386119 
C       2.837570   -0.898420    1.776376 
C       2.522993    0.260003    2.727280 
C       4.323304   -1.238865    1.825283 
C       2.029767   -2.122494    2.220483 
C      -4.516302   -0.646506    1.791725 
C      -2.337554   -1.750390    2.279641 
C       4.707284   -0.339099   -1.299599 
C       2.733909    0.814910   -2.255827 
C       1.156456    4.317403   -1.802963 
H       5.281531    0.203319   -2.059706 
H       4.445394   -1.313923   -1.715777 
H       5.368793   -0.496023   -0.448229 
H       3.389490    1.419617   -2.893170 
H       1.811545    1.370820   -2.071561 
H       2.463208   -0.088830   -2.809182 
H       4.420213    2.407277   -0.871009 
H       4.442882    1.559260    0.674770 
H       2.948188    2.318230    0.105196 
H       4.577688   -1.608258    2.825728 
H       4.958069   -0.370137    1.632847 
H       4.583750   -2.023862    1.110517 
H       2.263155   -2.351389    3.266175 
H       2.263121   -3.003463    1.618331 
H       0.955138   -1.933678    2.137351 
H       2.883563    0.020698    3.734310 
H       1.440877    0.419741    2.783467 
H       2.992550    1.201422    2.424900 
H      -4.820971   -0.947896    2.800854 
H      -4.855275   -1.422984    1.100987 
H      -5.047500    0.280262    1.560497 
H      -2.607661   -1.892833    3.332078 
H      -1.247277   -1.684285    2.205996 
H      -2.659557   -2.633183    1.722812 
H      -2.993937    0.564168    3.652075 
H      -2.926670    1.665112    2.271807 
H      -1.488582    0.736779    2.731106 
H      -4.074067    2.871269   -1.153879 
H      -2.632344    2.638638   -0.155073 
H      -4.225502    2.168233    0.456343 
H      -3.219911    1.570650   -3.074957 
H      -2.527954   -0.045536   -2.859012 
H      -1.658632    1.359105   -2.247595 
H      -5.251184    0.699534   -2.172295 
H      -5.449531    0.196984   -0.499079 
H      -4.652075   -0.879032   -1.655252 
H      -2.412685   -4.109382   -1.636152 
H       1.903028   -4.325499   -1.673262 
H      -0.316824   -5.376534   -2.128888 
H       0.190490    2.194801    1.855713 
C       0.334155    4.557591    1.132702 
H       0.043259    2.457263   -1.596188 
H       1.043544    4.342116   -2.888388 
H       1.131024    5.350867   -1.447093 
H       2.149866    3.914125   -1.586908 
H       1.318343    5.005313    0.955373 
H      -0.403388    5.316871    0.853930 
H       0.242562    4.354431    2.201064 

80
REACTION D. Z_ISOMER, M06L, 
G_raw (298.15 K) =        -2011.981338 Hartree
C       0.981862   -3.786482   -1.485512 
C      -0.260389   -4.366435   -1.734957 
C      -1.434780   -3.667982   -1.462695 
C      -1.339518   -2.381117   -0.946931 
C      -0.121082   -1.733805   -0.685281 
C       1.022842   -2.497157   -0.970370 
O      -2.512278   -1.697161   -0.671262 
P      -2.265379   -0.191849    0.041762 
C      -3.002193   -0.477995    1.753789 
C      -2.584142    0.691765    2.648909 
Ir     -0.018268    0.138001    0.060558 
N       0.118591    2.148224    0.836914 
C       0.165363    3.324670    0.312575 
C       0.059562    3.472675   -1.172712 
H      -0.919536    3.919917   -1.398777 
O       2.263241   -1.931992   -0.716779 
P       2.175095   -0.447550    0.070176 
C       3.463258    0.473557   -0.941926 
C       3.841154    1.754603   -0.197966 
C      -3.417027    0.809645   -1.055454 
C      -4.769872    0.158926   -1.345983 
C      -3.600900    2.192906   -0.431707 
C      -2.659734    0.935424   -2.383803 
C       2.836030   -0.906127    1.774969 
C       2.522276    0.247630    2.731714 
C       4.321341   -1.248759    1.824297 
C       2.027076   -2.131754    2.212740 
C      -4.516605   -0.655135    1.790343 
C      -2.336240   -1.754916    2.278967 
C       4.711747   -0.336398   -1.294655 
C       2.744059    0.828057   -2.249276 
C       1.154795    4.327686   -1.798201 
H       5.289539    0.209634   -2.049530 
H       4.448766   -1.307796   -1.718054 
H       5.370473   -0.500541   -0.442529 
H       3.403003    1.435093   -2.880982 
H       1.822623    1.385352   -2.064676 
H       2.473047   -0.071698   -2.808929 
H       4.431041    2.407439   -0.851512 
H       4.447375    1.551040    0.689626 
H       2.956305    2.317581    0.120790 
H       4.573426   -1.623633    2.823316 
H       4.957862   -0.380058    1.637690 
H       4.581991   -2.030471    1.106065 
H       2.260314   -2.365847    3.257352 
H       2.260051   -3.010097    1.606592 
H       0.952569   -1.942050    2.130477 
H       2.879184    0.000917    3.738317 
H       1.440567    0.410964    2.785836 
H       2.996283    1.189108    2.436659 
H      -4.821204   -0.958244    2.799002 
H      -4.853633   -1.431523    1.098585 
H      -5.049589    0.270781    1.559922 
H      -2.609245   -1.900003    3.330334 
H      -1.245896   -1.686156    2.208828 
H      -2.654544   -2.637468    1.719622 
H      -2.998110    0.554247    3.654317 
H      -2.936123    1.658862    2.276955 
H      -1.493693    0.735736    2.733753 
H      -4.084194    2.867601   -1.147419 
H      -2.640560    2.638818   -0.150474 
H      -4.231627    2.161884    0.461905 
H      -3.225703    1.576133   -3.069727 
H      -2.533916   -0.040895   -2.860311 
H      -1.663330    1.361479   -2.245011 
H      -5.253832    0.695372   -2.170506 
H      -5.452536    0.192169   -0.497675 
H      -4.652631   -0.882441   -1.653552 
H      -2.410039   -4.108184   -1.641520 
H       1.905535   -4.320211   -1.682943 
H      -0.313631   -5.372668   -2.137991 
H       0.187135    2.196625    1.855219 
C       0.328673    4.560328    1.134388 
H       0.046797    2.463511   -1.598222 
H       1.045336    4.353361   -2.883963 
H       1.124232    5.360682   -1.441289 
H       2.149087    3.928024   -1.579341 
H       1.312654    5.009363    0.959193 
H      -0.409047    5.319027    0.854402 
H       0.235154    4.356928    2.202530 

80
REACTION D. Z_ISOMER, M11L, 
G_raw (298.15 K) =   -2011.991065
C       0.986258   -3.801861   -1.293396 
C      -0.246907   -4.388734   -1.514085 
C      -1.415408   -3.689692   -1.268633 
C      -1.320137   -2.393087   -0.805957 
C      -0.113123   -1.736893   -0.571599 
C       1.022081   -2.502745   -0.830330 
O      -2.470156   -1.708734   -0.565428 
P      -2.257879   -0.198590    0.040028 
C      -3.057048   -0.398317    1.714395 
C      -2.713532    0.813126    2.559386 
Ir     -0.014347    0.140359    0.092660 
N       0.114452    2.130798    0.833021 
C       0.142786    3.315462    0.364127 
C       0.004069    3.531911   -1.101640 
H      -0.979999    4.004476   -1.279392 
O       2.236494   -1.930029   -0.610283 
P       2.178741   -0.435339    0.065706 
C       3.381227    0.407749   -1.078836 
C       3.817835    1.726190   -0.474618 
C      -3.357112    0.701038   -1.162541 
C      -4.679791    0.023405   -1.465250 
C      -3.581773    2.118022   -0.675479 
C      -2.550716    0.719878   -2.452498 
C       2.935218   -0.799579    1.732189 
C       2.715934    0.399855    2.635039 
C       4.398438   -1.184066    1.715265 
C       2.133648   -1.965687    2.288414 
C      -4.554078   -0.619874    1.707893 
C      -2.389440   -1.618457    2.327496 
C       4.582927   -0.424692   -1.480239 
C       2.563886    0.678952   -2.332851 
C       1.079405    4.394833   -1.716030 
H       5.106923    0.083419   -2.306272 
H       4.285363   -1.416903   -1.841470 
H       5.312593   -0.556825   -0.674457 
H       3.200097    1.163321   -3.090930 
H       1.706005    1.331555   -2.125468 
H       2.165460   -0.249119   -2.769081 
H       4.324922    2.340939   -1.235556 
H       4.523792    1.595165    0.357109 
H       2.960574    2.309240   -0.101206 
H       4.693742   -1.527546    2.720013 
H       5.058978   -0.343912    1.461278 
H       4.600788   -2.009344    1.018687 
H       2.437746   -2.147454    3.331317 
H       2.302584   -2.890042    1.720706 
H       1.054118   -1.755710    2.277744 
H       3.118717    0.188467    3.638459 
H       1.640825    0.606299    2.743258 
H       3.206242    1.314403    2.271797 
H      -4.879777   -0.911462    2.719728 
H      -4.853030   -1.426729    1.025157 
H      -5.117063    0.286217    1.444921 
H      -2.710946   -1.719007    3.376109 
H      -1.293557   -1.528654    2.310309 
H      -2.658999   -2.543539    1.800908 
H      -3.162871    0.709392    3.560145 
H      -3.081306    1.758056    2.133130 
H      -1.624971    0.900449    2.687586 
H      -4.000748    2.736800   -1.484627 
H      -2.643620    2.593364   -0.349556 
H      -4.289662    2.165856    0.164679 
H      -3.107366    1.274011   -3.225009 
H      -2.376213   -0.298269   -2.829606 
H      -1.565972    1.188396   -2.325665 
H      -5.126410    0.496622   -2.354647 
H      -5.411338    0.114024   -0.656278 
H      -4.546709   -1.041202   -1.695301 
H      -2.394096   -4.141097   -1.432694 
H       1.914946   -4.342365   -1.476138 
H      -0.298468   -5.414740   -1.880995 
H       0.203968    2.156554    1.851865 
C       0.305540    4.511278    1.225897 
H      -0.038087    2.541472   -1.576682 
H       0.933481    4.478228   -2.799931 
H       1.078609    5.415934   -1.310887 
H       2.082232    3.974064   -1.553537 
H       1.281028    4.990078    1.051185 
H      -0.452106    5.274068    0.995147 
H       0.238416    4.260790    2.291107 

80
REACTION D. Z_ISOMER, PBE0-D3, 
G_raw (298.15 K) =   -2010.460769 Hartree
C       1.009700   -3.816207   -1.370628 
C      -0.228218   -4.418976   -1.576881 
C      -1.404944   -3.730928   -1.294634 
C      -1.315898   -2.431673   -0.812630 
C      -0.103408   -1.763137   -0.597379 
C       1.043192   -2.515293   -0.887356 
O      -2.484137   -1.758398   -0.525245 
P      -2.254106   -0.200508    0.057175 
C      -3.060542   -0.350347    1.747005 
C      -2.790506    0.932096    2.536725 
Ir     -0.011687    0.126701    0.089812 
N       0.114260    2.094688    0.820974 
C       0.122014    3.275461    0.318097 
C      -0.021223    3.461834   -1.159977 
H      -0.993723    3.937665   -1.343524 
O       2.273075   -1.928387   -0.669062 
P       2.183017   -0.424588    0.069939 
C       3.394510    0.490952   -1.025321 
C       3.744640    1.821435   -0.358559 
C      -3.339670    0.701123   -1.176662 
C      -4.679707    0.026100   -1.471604 
C      -3.546582    2.136041   -0.693094 
C      -2.514903    0.691636   -2.471298 
C       2.903162   -0.818016    1.760043 
C       2.626366    0.370213    2.684544 
C       4.388453   -1.167744    1.770215 
C       2.101404   -2.024765    2.263735 
C      -4.555943   -0.654383    1.721900 
C      -2.324385   -1.509736    2.430642 
C       4.657360   -0.294278   -1.382268 
C       2.612717    0.749430   -2.319987 
C       1.074021    4.312286   -1.799142 
H       5.193063    0.241201   -2.175063 
H       4.405028   -1.288674   -1.756559 
H       5.340892   -0.402708   -0.540968 
H       3.232555    1.339905   -3.005003 
H       1.683525    1.287889   -2.123613 
H       2.351971   -0.189901   -2.815213 
H       4.273880    2.462093   -1.073279 
H       4.398794    1.684483    0.506710 
H       2.846290    2.353416   -0.029829 
H       4.664207   -1.517704    2.772031 
H       5.019378   -0.305194    1.541958 
H       4.617641   -1.968866    1.063188 
H       2.363290   -2.214642    3.310918 
H       2.323710   -2.922705    1.682973 
H       1.026296   -1.836073    2.195926 
H       3.005831    0.144110    3.687700 
H       1.548914    0.543478    2.756868 
H       3.106693    1.292363    2.346039 
H      -4.885461   -0.905502    2.737061 
H      -4.782790   -1.506075    1.075971 
H      -5.145570    0.204877    1.393700 
H      -2.672309   -1.591642    3.466879 
H      -1.244352   -1.336960    2.431790 
H      -2.515634   -2.459003    1.924933 
H      -3.195207    0.823066    3.549459 
H      -3.254785    1.813009    2.086628 
H      -1.715783    1.112678    2.617358 
H      -3.956750    2.744981   -1.506664 
H      -2.604519    2.589851   -0.372489 
H      -4.251174    2.184169    0.141728 
H      -3.034667    1.280561   -3.235964 
H      -2.393030   -0.327923   -2.847085 
H      -1.515030    1.102793   -2.317261 
H      -5.131180    0.508054   -2.346981 
H      -5.389155    0.112230   -0.649350 
H      -4.540941   -1.032077   -1.703057 
H      -2.378136   -4.186886   -1.439745 
H       1.936906   -4.340357   -1.574392 
H      -0.275990   -5.434927   -1.955089 
H       0.208006    2.125436    1.835028 
C       0.257862    4.496061    1.172693 
H      -0.060004    2.465862   -1.608031 
H       0.916184    4.370552   -2.878419 
H       1.078612    5.333844   -1.409523 
H       2.062806    3.878817   -1.631263 
H       1.211914    4.996258    0.975905 
H      -0.531656    5.217003    0.937460 
H       0.209548    4.254006    2.236466 

80
REACTION D. Z_ISOMER, PBE0, 
G_raw (298.15 K) =        -2010.380877 Hartree
C       1.033999   -3.870038   -1.219293 
C      -0.199292   -4.478857   -1.430989 
C      -1.379392   -3.780967   -1.193136 
C      -1.297243   -2.466938   -0.750177 
C      -0.090233   -1.790112   -0.532172 
C       1.058975   -2.554096   -0.775821 
O      -2.471087   -1.787297   -0.507317 
P      -2.263041   -0.216977    0.045640 
C      -3.111540   -0.348847    1.723277 
C      -2.896044    0.952779    2.498355 
Ir     -0.009836    0.121564    0.097077 
N       0.083820    2.102548    0.817540 
C       0.083340    3.293995    0.339571 
C      -0.023080    3.511719   -1.138139 
H      -1.034270    3.889368   -1.342809 
O       2.285537   -1.963772   -0.556865 
P       2.201304   -0.410180    0.070083 
C       3.382428    0.425831   -1.132404 
C       3.788888    1.788868   -0.572483 
C      -3.344368    0.649501   -1.228006 
C      -4.650510   -0.076619   -1.556781 
C      -3.629574    2.079855   -0.769191 
C      -2.486075    0.670216   -2.500074 
C       2.994326   -0.688370    1.757590 
C       2.818595    0.573484    2.605635 
C       4.464475   -1.099907    1.720323 
C       2.178478   -1.817509    2.399577 
C      -4.599274   -0.689175    1.669788 
C      -2.370160   -1.478394    2.449951 
C       4.619957   -0.399563   -1.491965 
C       2.558332    0.616919   -2.412367 
C       0.992542    4.492393   -1.718920 
H       5.136667    0.091736   -2.325157 
H       4.341497   -1.405154   -1.813429 
H       5.329995   -0.482292   -0.669632 
H       3.163534    1.153067   -3.153221 
H       1.643601    1.181736   -2.220956 
H       2.267757   -0.345693   -2.841815 
H       4.302848    2.365143   -1.350528 
H       4.475253    1.693286    0.273065 
H       2.918677    2.366475   -0.246074 
H       4.773822   -1.398949    2.728954 
H       5.118269   -0.280599    1.411188 
H       4.628128   -1.952374    1.056561 
H       2.505195   -1.946109    3.438094 
H       2.320412   -2.764348    1.873986 
H       1.110827   -1.580016    2.390873 
H       3.237780    0.396240    3.602983 
H       1.757249    0.807313    2.723285 
H       3.323654    1.446280    2.183875 
H      -4.945074   -0.924446    2.683541 
H      -4.792357   -1.562040    1.041442 
H      -5.202842    0.147057    1.308920 
H      -2.725637   -1.529587    3.485717 
H      -1.291306   -1.297939    2.452419 
H      -2.550387   -2.445780    1.975602 
H      -3.319985    0.846262    3.503636 
H      -3.377322    1.812654    2.025926 
H      -1.829985    1.168544    2.602806 
H      -4.057894    2.651796   -1.600413 
H      -2.718291    2.590850   -0.445242 
H      -4.349846    2.108514    0.053010 
H      -3.013638    1.228552   -3.282471 
H      -2.305826   -0.343763   -2.867222 
H      -1.512121    1.130890   -2.321354 
H      -5.100969    0.396512   -2.437672 
H      -5.380404   -0.025630   -0.749238 
H      -4.467817   -1.126373   -1.794457 
H      -2.349946   -4.241091   -1.343260 
H       1.964307   -4.400725   -1.389862 
H      -0.240868   -5.505982   -1.778607 
H       0.140043    2.119143    1.834865 
C       0.159120    4.497834    1.226711 
H       0.050933    2.530786   -1.614081 
H       0.863077    4.563587   -2.801260 
H       0.872998    5.497952   -1.306662 
H       2.018726    4.167393   -1.528566 
H       1.095226    5.040639    1.060387 
H      -0.654028    5.194153    0.996677 
H       0.101437    4.226593    2.282911 

80
REACTION D. Z_ISOMER, PBE-D2, 
G_raw (298.15 K) =        -2010.363926
C       0.965206   -3.844741   -1.435970 
C      -0.289404   -4.435436   -1.647068 
C      -1.467052   -3.731479   -1.356494 
C      -1.363637   -2.428065   -0.860690 
C      -0.132126   -1.769618   -0.637083 
C       1.015895   -2.539204   -0.939471 
O      -2.540171   -1.740471   -0.568352 
P      -2.257596   -0.177171    0.056504 
C      -3.018167   -0.338449    1.773496 
C      -2.672923    0.930895    2.569638 
Ir     -0.014891    0.120128    0.079192 
N       0.156631    2.085326    0.817992 
C       0.179279    3.270540    0.284825 
C       0.024871    3.420288   -1.201844 
H      -0.924179    3.953392   -1.397998 
O       2.270165   -1.965360   -0.723597 
P       2.167594   -0.457251    0.063970 
C       3.407895    0.501403   -0.970444 
C       3.707306    1.817999   -0.236084 
C      -3.341722    0.790523   -1.135849 
C      -4.731264    0.186704   -1.388128 
C      -3.447133    2.233472   -0.619385 
C      -2.551077    0.749479   -2.460241 
C       2.837161   -0.874745    1.776666 
C       2.484822    0.301621    2.704302 
C       4.336848   -1.183032    1.834499 
C       2.030931   -2.108183    2.226249 
C      -4.529472   -0.595896    1.794300 
C      -2.276372   -1.532111    2.407392 
C       4.700989   -0.259271   -1.302093 
C       2.657870    0.788472   -2.286620 
C       1.177711    4.190489   -1.868088 
H       5.258531    0.310831   -2.066623 
H       4.469449   -1.252949   -1.713805 
H       5.354157   -0.380705   -0.428346 
H       3.280795    1.444984   -2.919948 
H       1.687577    1.271379   -2.094291 
H       2.465195   -0.147867   -2.833389 
H       4.280799    2.484644   -0.904213 
H       4.311148    1.646974    0.669478 
H       2.777540    2.335562    0.052950 
H       4.588519   -1.540081    2.848998 
H       4.945572   -0.288060    1.633005 
H       4.612890   -1.969989    1.116132 
H       2.260989   -2.314390    3.286327 
H       2.287419   -2.994501    1.627126 
H       0.950417   -1.918221    2.116996 
H       2.836010    0.072106    3.725869 
H       1.390038    0.432298    2.725639 
H       2.951209    1.246333    2.382647 
H      -4.828782   -0.872903    2.820901 
H      -4.806519   -1.421248    1.121013 
H      -5.100214    0.302547    1.513152 
H      -2.584993   -1.620369    3.464090 
H      -1.185941   -1.372781    2.353860 
H      -2.513902   -2.471918    1.886690 
H      -3.037825    0.813528    3.605233 
H      -3.136031    1.833962    2.143140 
H      -1.581210    1.072806    2.594457 
H      -3.876011    2.874434   -1.409671 
H      -2.457141    2.633508   -0.348050 
H      -4.105009    2.296991    0.261981 
H      -3.050651    1.403432   -3.196798 
H      -2.524465   -0.276248   -2.860190 
H      -1.509501    1.077058   -2.317223 
H      -5.189813    0.706058   -2.248655 
H      -5.404294    0.300700   -0.528451 
H      -4.647557   -0.882002   -1.635982 
H      -2.451498   -4.179861   -1.506226 
H       1.891446   -4.382925   -1.647877 
H      -0.349540   -5.454723   -2.035851 
H       0.279384    2.136121    1.839503 
C       0.358518    4.511532    1.111578 
H      -0.071165    2.406282   -1.622735 
H       1.013555    4.244875   -2.954814 
H       1.252592    5.220232   -1.484088 
H       2.139329    3.684470   -1.694718 
H       1.306098    5.013848    0.851427 
H      -0.449161    5.233473    0.901093 
H       0.365308    4.285607    2.188646 

80
REACTION D. Z_ISOMER, PBE-D3BJ, 
G_raw (298.15 K) =        -2010.352102 Hartree
C       1.032691   -3.829891   -1.408173 
C      -0.211588   -4.441024   -1.617157 
C      -1.398875   -3.755636   -1.324931 
C      -1.315248   -2.449731   -0.832431 
C      -0.095655   -1.770015   -0.617402 
C       1.062984   -2.522589   -0.914667 
O      -2.501801   -1.784078   -0.531870 
P      -2.263647   -0.201525    0.062585 
C      -3.060352   -0.366556    1.776610 
C      -2.832539    0.940215    2.554806 
Ir     -0.009649    0.125163    0.085502 
N       0.107983    2.091451    0.820892 
C       0.103055    3.285545    0.308907 
C      -0.041569    3.455043   -1.177404 
H      -1.033708    3.902268   -1.374424 
O       2.307271   -1.932282   -0.692375 
P       2.198584   -0.412272    0.074725 
C       3.422528    0.525014   -1.020534 
C       3.747147    1.866458   -0.344128 
C      -3.373249    0.704561   -1.175487 
C      -4.718561    0.017715   -1.455936 
C      -3.582620    2.144722   -0.682728 
C      -2.548280    0.696682   -2.479388 
C       2.913659   -0.821811    1.784025 
C       2.622686    0.370382    2.712273 
C       4.407881   -1.166135    1.798134 
C       2.102448   -2.037953    2.272253 
C      -4.550530   -0.730097    1.757543 
C      -2.264811   -1.496754    2.460147 
C       4.705235   -0.251386   -1.357835 
C       2.643280    0.767716   -2.329057 
C       1.036047    4.332068   -1.831888 
H       5.240596    0.280107   -2.163430 
H       4.467758   -1.262776   -1.716229 
H       5.387971   -0.332874   -0.503464 
H       3.249228    1.399317   -3.001102 
H       1.680059    1.261015   -2.135213 
H       2.432042   -0.182558   -2.841659 
H       4.290984    2.514314   -1.052594 
H       4.387099    1.733707    0.541289 
H       2.832100    2.395246   -0.034631 
H       4.682898   -1.521953    2.806069 
H       5.038769   -0.293304    1.574693 
H       4.645826   -1.967429    1.083647 
H       2.350638   -2.232987    3.329303 
H       2.334838   -2.938225    1.686293 
H       1.021908   -1.844980    2.186533 
H       2.991039    0.140447    3.726554 
H       1.536825    0.543201    2.769208 
H       3.110115    1.298632    2.378265 
H      -4.867431   -0.995688    2.780870 
H      -4.746793   -1.595642    1.108477 
H      -5.178604    0.110925    1.429538 
H      -2.590392   -1.581093    3.510993 
H      -1.185162   -1.279452    2.430588 
H      -2.430690   -2.463225    1.963142 
H      -3.204373    0.816225    3.586077 
H      -3.359147    1.796687    2.109557 
H      -1.760199    1.179851    2.605053 
H      -4.002772    2.758441   -1.497469 
H      -2.634798    2.604555   -0.364721 
H      -4.286540    2.186947    0.161978 
H      -3.059569    1.314426   -3.237330 
H      -2.451612   -0.325925   -2.873280 
H      -1.531086    1.082339   -2.316844 
H      -5.186353    0.499204   -2.332102 
H      -5.421350    0.101096   -0.617905 
H      -4.573841   -1.046419   -1.689051 
H      -2.376075   -4.220284   -1.469807 
H       1.967147   -4.354021   -1.617413 
H      -0.256002   -5.461521   -2.003821 
H       0.205297    2.126137    1.844581 
C       0.221256    4.513018    1.166535 
H      -0.052358    2.442389   -1.611097 
H       0.873723    4.375851   -2.918451 
H       1.015611    5.363984   -1.449917 
H       2.042365    3.923133   -1.660160 
H       1.157282    5.053906    0.949436 
H      -0.602807    5.214187    0.954416 
H       0.206714    4.264558    2.237420 

80
REACTION D. Z_ISOMER, PBE-D3, 
G_raw (298.15 K) =        -2010.299931 Hartree
C       1.033420   -3.836868   -1.394327 
C      -0.210518   -4.450980   -1.596708 
C      -1.397431   -3.765899   -1.302111 
C      -1.313526   -2.458011   -0.814273 
C      -0.094595   -1.773926   -0.606763 
C       1.063436   -2.527566   -0.905421 
O      -2.501196   -1.795461   -0.511124 
P      -2.265226   -0.205971    0.063068 
C      -3.082709   -0.349738    1.776753 
C      -2.870729    0.969846    2.540407 
Ir     -0.009382    0.124272    0.087395 
N       0.106201    2.097921    0.819708 
C       0.101665    3.297061    0.317952 
C      -0.038493    3.485662   -1.168022 
H      -1.027184    3.942782   -1.360771 
O       2.308763   -1.937187   -0.689290 
P       2.201396   -0.415401    0.073058 
C       3.426236    0.520330   -1.033742 
C       3.760838    1.863692   -0.362671 
C      -3.366702    0.688515   -1.201817 
C      -4.708199   -0.005422   -1.492958 
C      -3.588400    2.135364   -0.729516 
C      -2.526295    0.671356   -2.497658 
C       2.924191   -0.822724    1.787426 
C       2.639189    0.372191    2.716573 
C       4.419664   -1.169836    1.797612 
C       2.114637   -2.039168    2.283010 
C      -4.573134   -0.718507    1.742261 
C      -2.296519   -1.469585    2.490984 
C       4.706265   -0.261196   -1.377319 
C       2.641942    0.764134   -2.341066 
C       1.046546    4.363743   -1.811779 
H       5.243339    0.271554   -2.181333 
H       4.465191   -1.270330   -1.740389 
H       5.391595   -0.349759   -0.525454 
H       3.250530    1.387230   -3.019172 
H       1.684537    1.269145   -2.147705 
H       2.418799   -0.185649   -2.850175 
H       4.299363    2.509329   -1.077604 
H       4.409695    1.732946    0.516791 
H       2.850595    2.396584   -0.045311 
H       4.698564   -1.520791    2.806472 
H       5.052782   -0.299964    1.567770 
H       4.654240   -1.976043    1.087106 
H       2.373387   -2.236418    3.337442 
H       2.339230   -2.940371    1.694802 
H       1.033030   -1.846420    2.210376 
H       3.011126    0.142663    3.729966 
H       1.554080    0.549021    2.779880 
H       3.127736    1.299758    2.381345 
H      -4.906035   -0.964586    2.765645 
H      -4.758138   -1.597604    1.107748 
H      -5.199012    0.113871    1.388496 
H      -2.657921   -1.554985    3.530330 
H      -1.219014   -1.242265    2.503569 
H      -2.433687   -2.440616    1.993425 
H      -3.250874    0.857703    3.570286 
H      -3.399447    1.817376    2.080255 
H      -1.800831    1.219311    2.598367 
H      -3.995811    2.738439   -1.558941 
H      -2.647733    2.603223   -0.401158 
H      -4.307847    2.188066    0.101791 
H      -3.038024    1.269823   -3.271071 
H      -2.409053   -0.355094   -2.876578 
H      -1.516783    1.075727   -2.332089 
H      -5.168883    0.469513   -2.376781 
H      -5.421594    0.080551   -0.663911 
H      -4.559839   -1.070895   -1.718738 
H      -2.375304   -4.231324   -1.441097 
H       1.968797   -4.359418   -1.604264 
H      -0.254898   -5.473054   -1.979843 
H       0.199239    2.126444    1.844315 
C       0.214145    4.517656    1.188564 
H      -0.055630    2.480766   -1.618560 
H       0.887294    4.417903   -2.898491 
H       1.031245    5.392640   -1.421208 
H       2.050433    3.947811   -1.641584 
H       1.150148    5.062461    0.980641 
H      -0.610646    5.219180    0.979582 
H       0.195602    4.260372    2.257511 

80
REACTION D. Z_ISOMER, PBE, 
G_raw (298.15 K) =        -2010.224125 Hartree
C       1.041075   -3.907473   -1.207532 
C      -0.200384   -4.522937   -1.416529 
C      -1.388538   -3.819285   -1.178338 
C      -1.307176   -2.493436   -0.739612 
C      -0.091054   -1.806337   -0.527070 
C       1.067052   -2.579795   -0.768368 
O      -2.498817   -1.815551   -0.494790 
P      -2.277968   -0.214532    0.048386 
C      -3.141741   -0.333141    1.749105 
C      -2.951302    0.995434    2.502917 
Ir     -0.009573    0.117297    0.097422 
N       0.087725    2.104252    0.818776 
C       0.081585    3.314403    0.343409 
C      -0.033083    3.539614   -1.140408 
H      -1.050553    3.925122   -1.342733 
O       2.311428   -1.991002   -0.552043 
P       2.216558   -0.407364    0.071059 
C       3.405716    0.430344   -1.163861 
C       3.825824    1.800767   -0.606363 
C      -3.370875    0.646968   -1.258504 
C      -4.682192   -0.092325   -1.580078 
C      -3.662184    2.090659   -0.813641 
C      -2.499165    0.652578   -2.532935 
C       3.031162   -0.674104    1.780088 
C       2.875156    0.610835    2.613996 
C       4.505858   -1.101619    1.726853 
C       2.203678   -1.793493    2.445429 
C      -4.631907   -0.701590    1.687137 
C      -2.377847   -1.444324    2.499720 
C       4.643164   -0.409613   -1.529406 
C       2.562411    0.619099   -2.442985 
C       0.988750    4.522546   -1.733529 
H       5.162273    0.079461   -2.372279 
H       4.355154   -1.420948   -1.848914 
H       5.361446   -0.494857   -0.704517 
H       3.159364    1.168783   -3.191825 
H       1.636236    1.176193   -2.239615 
H       2.276804   -0.350938   -2.877107 
H       4.344845    2.374254   -1.393757 
H       4.519570    1.702342    0.242271 
H       2.956674    2.391389   -0.276756 
H       4.830726   -1.388507    2.742349 
H       5.166713   -0.288220    1.392157 
H       4.653336   -1.972452    1.071331 
H       2.547423   -1.922025    3.486421 
H       2.322602   -2.751869    1.920083 
H       1.132916   -1.536635    2.452106 
H       3.293972    0.440042    3.620899 
H       1.811296    0.867270    2.730744 
H       3.398772    1.474154    2.177088 
H      -4.987429   -0.922243    2.708970 
H      -4.805193   -1.596861    1.072237 
H      -5.249487    0.121846    1.299439 
H      -2.744429   -1.491555    3.539787 
H      -1.296156   -1.237756    2.509318 
H      -2.532248   -2.427628    2.032422 
H      -3.363742    0.895196    3.521737 
H      -3.465280    1.838300    2.017737 
H      -1.883767    1.245050    2.593342 
H      -4.099565    2.652949   -1.656723 
H      -2.746779    2.615298   -0.499517 
H      -4.384486    2.128609    0.016062 
H      -3.018586    1.219130   -3.325344 
H      -2.328048   -0.370944   -2.898939 
H      -1.513699    1.104609   -2.347442 
H      -5.136213    0.370049   -2.474115 
H      -5.417607   -0.030654   -0.768065 
H      -4.496069   -1.151978   -1.803911 
H      -2.365695   -4.284354   -1.324100 
H       1.978039   -4.442272   -1.376184 
H      -0.241986   -5.558847   -1.760958 
H       0.151529    2.116838    1.846086 
C       0.155980    4.515951    1.246276 
H       0.033180    2.551739   -1.622616 
H       0.846167    4.599378   -2.821274 
H       0.880987    5.534125   -1.313524 
H       2.021542    4.187356   -1.555108 
H       1.083163    5.085209    1.067678 
H      -0.679570    5.206492    1.042561 
H       0.125420    4.231219    2.307967

72
REACTION E. ANTI_ISOMER, B3LYP, 
G_raw (298.15 K) = -2740.165229 Hartree
C       2.417627    2.492846    0.992170 
C       2.747377    1.859291   -0.215506 
C       3.336894    2.611373   -1.238030 
C       3.599517    3.969030   -1.054024 
C       3.276029    4.588572    0.149709 
C       2.684812    3.846319    1.171916 
P       2.333127    0.069032   -0.393464 
C       3.434799   -0.745525    0.844750 
C       2.969930   -1.814712    1.615565 
C       3.828744   -2.474844    2.494089 
C       5.154637   -2.068864    2.615711 
C       5.623392   -0.995323    1.858322 
C       4.769438   -0.337502    0.978381 
Ir      0.000000   -0.166433   -0.299517 
Si      0.000000   -2.099315   -1.625567 
C       1.486939   -2.257246   -2.819903 
C       2.903255   -1.936845   -2.316447 
C       3.119799   -0.448714   -1.986146 
Cl      0.000000   -0.187659    2.215415 
P      -2.333127    0.069031   -0.393464 
C      -2.747378    1.859290   -0.215507 
C      -3.336897    2.611371   -1.238030 
C      -3.599520    3.969029   -1.054025 
C      -3.276030    4.588572    0.149707 
C      -2.684811    3.846320    1.171914 
C      -2.417626    2.492846    0.992168 
C      -3.119799   -0.448715   -1.986145 
C      -2.903255   -1.936846   -2.316446 
C      -1.486939   -2.257247   -2.819902 
C      -3.434799   -0.745525    0.844751 
C      -4.769438   -0.337501    0.978383 
C      -5.623391   -0.995322    1.858324 
C      -5.154636   -2.068864    2.615712 
C      -3.828744   -2.474845    2.494088 
C      -2.969930   -1.814713    1.615565 
C       0.000001   -3.650382   -0.518508 
H       0.000000    0.317079   -1.799392 
H      -4.188158   -0.225935   -1.921383 
H      -2.693899    0.169491   -2.781417 
H      -3.633014   -2.207426   -3.087840 
H      -3.154322   -2.552682   -1.445889 
H      -1.275956   -1.630107   -3.695753 
H      -1.468592   -3.292492   -3.185769 
H       0.881226   -3.691162    0.126008 
H       0.000001   -4.550893   -1.144204 
H      -0.881224   -3.691163    0.126009 
H       1.468592   -3.292491   -3.185770 
H       1.275956   -1.630106   -3.695753 
H       3.633014   -2.207425   -3.087841 
H       3.154322   -2.552681   -1.445890 
H       2.693899    0.169492   -2.781417 
H       4.188158   -0.225933   -1.921383 
H      -5.143246    0.503150    0.404234 
H      -6.652303   -0.667463    1.956221 
H      -5.819618   -2.579336    3.303422 
H      -3.453990   -3.298675    3.090844 
H      -1.930829   -2.106847    1.550696 
H      -3.598885    2.151740   -2.182523 
H      -4.058278    4.538859   -1.854403 
H      -3.480839    5.643831    0.290896 
H      -2.426169    4.322300    2.111000 
H      -1.945350    1.926195    1.786925 
H       1.930829   -2.106845    1.550697 
H       3.453991   -3.298673    3.090845 
H       5.819618   -2.579336    3.303421 
H       6.652304   -0.667464    1.956217 
H       5.143247    0.503149    0.404231 
H       3.598881    2.151743   -2.182524 
H       4.058273    4.538862   -1.854402 
H       3.480838    5.643831    0.290899 
H       2.426171    4.322298    2.111003 
H       1.945353    1.926194    1.786927 

72
REACTION E. ANTI_ISOMER, M06L, 
G_raw (298.15 K) = -2739.920624 Hartree
C       2.397239    2.474980    1.008827 
C       2.802832    1.844593   -0.174889 
C       3.518488    2.575915   -1.126094 
C       3.825583    3.914051   -0.895740 
C       3.423520    4.531726    0.282335 
C       2.711179    3.808005    1.234929 
P       2.312838    0.099515   -0.411588 
C       3.271477   -0.798649    0.859934 
C       2.692528   -1.879424    1.526202 
C       3.432642   -2.612861    2.447239 
C       4.752041   -2.266179    2.715258 
C       5.334342   -1.184310    2.060199 
C       4.598607   -0.453932    1.135172 
Ir     -0.000965   -0.084598   -0.370597 
Si      0.018450   -1.988935   -1.719314 
C       1.498203   -2.101338   -2.902650 
C       2.895627   -1.871159   -2.331561 
C       3.159581   -0.412931   -1.955858 
Cl     -0.013549   -0.000897    2.136820 
P      -2.316478    0.072570   -0.416197 
C      -2.820284    1.816955   -0.207631 
C      -3.535780    2.529280   -1.173202 
C      -3.855366    3.867739   -0.963147 
C      -3.466100    4.504719    0.208911 
C      -2.753615    3.800078    1.175734 
C      -2.427015    2.466913    0.969752 
C      -3.158544   -0.475120   -1.950274 
C      -2.876578   -1.936535   -2.299700 
C      -1.478989   -2.155952   -2.874119 
C      -3.269053   -0.810545    0.870227 
C      -4.588067   -0.450421    1.163511 
C      -5.319374   -1.172100    2.099044 
C      -4.741019   -2.260529    2.746360 
C      -3.429729   -2.623153    2.459818 
C      -2.694450   -1.898430    1.528454 
C       0.078517   -3.567399   -0.673787 
H      -0.000442    0.331084   -1.900000 
H      -4.233091   -0.304008   -1.818902 
H      -2.818273    0.172954   -2.766078 
H      -3.634496   -2.258196   -3.023693 
H      -3.037842   -2.568528   -1.414847 
H      -1.333762   -1.476430   -3.725366 
H      -1.417786   -3.168831   -3.295573 
H       1.015002   -3.659324   -0.117001 
H       0.007877   -4.437629   -1.337981 
H      -0.740236   -3.639162    0.046439 
H       1.451669   -3.106386   -3.344646 
H       1.333937   -1.406468   -3.737628 
H       3.655151   -2.169049   -3.064032 
H       3.069452   -2.516267   -1.458476 
H       2.811362    0.246014   -2.759516 
H       4.232252   -0.231793   -1.822191 
H      -5.040525    0.405324    0.667372 
H      -6.340197   -0.882145    2.326768 
H      -5.312072   -2.820290    3.480481 
H      -2.971754   -3.462799    2.972654 
H      -1.657926   -2.148471    1.327218 
H      -3.851955    2.050630   -2.094131 
H      -4.411629    4.411460   -1.720133 
H      -3.716541    5.548564    0.369154 
H      -2.446747    4.292502    2.092998 
H      -1.857605    1.917992    1.716328 
H       1.650922   -2.118919    1.338707 
H       2.972008   -3.447314    2.966135 
H       5.326774   -2.833193    3.440917 
H       6.361492   -0.906390    2.273990 
H       5.054135    0.396778    0.633103 
H       3.843687    2.112656   -2.051761 
H       4.381921    4.472684   -1.641801 
H       3.663988    5.575351    0.458225 
H       2.394412    4.285093    2.156927 
H       1.827136    1.911702    1.744017 

72
REACTION E. ANTI_ISOMER, M11L, 
G_raw (298.15 K) = -2739.942504 Hartree
C       2.817972    2.353140    1.156880 
C       2.777712    1.858782   -0.143235 
C       3.040550    2.719644   -1.200869 
C       3.358600    4.042634   -0.961455 
C       3.408937    4.522083    0.332182 
C       3.134310    3.675139    1.389900 
P       2.295907    0.135684   -0.402024 
C       3.313642   -0.758231    0.795740 
C       2.780751   -1.806298    1.531017 
C       3.587347   -2.546133    2.374848 
C       4.928608   -2.242041    2.494283 
C       5.466422   -1.191522    1.772585 
C       4.664373   -0.454581    0.926316 
Ir     -0.007907   -0.075832   -0.352161 
Si      0.037112   -1.990508   -1.661417 
C       1.469824   -2.055914   -2.858112 
C       2.863936   -1.781054   -2.336738 
C       3.084582   -0.327147   -1.967556 
Cl      0.007798    0.064557    2.137494 
P      -2.317668    0.047627   -0.387816 
C      -2.866232    1.760472   -0.200412 
C      -3.515120    2.458678   -1.209142 
C      -3.887711    3.776005   -1.017419 
C      -3.617772    4.407254    0.179879 
C      -2.969339    3.718980    1.188421 
C      -2.590519    2.405969    1.002105 
C      -3.123731   -0.528833   -1.903720 
C      -2.833671   -1.983915   -2.215076 
C      -1.446073   -2.201929   -2.777183 
C      -3.262004   -0.832733    0.879275 
C      -4.587181   -0.502223    1.133455 
C      -5.323616   -1.227708    2.048073 
C      -4.743274   -2.290133    2.715954 
C      -3.425907   -2.622798    2.470547 
C      -2.685927   -1.895225    1.558582 
C       0.162648   -3.538432   -0.632431 
H      -0.018821    0.339590   -1.866820 
H      -4.207816   -0.355421   -1.800115 
H      -2.769913    0.100726   -2.737367 
H      -3.596135   -2.334890   -2.930184 
H      -2.992398   -2.599657   -1.309641 
H      -1.315666   -1.543370   -3.656403 
H      -1.380281   -3.228596   -3.183033 
H       1.104857   -3.604570   -0.069776 
H       0.124341   -4.426022   -1.286448 
H      -0.649942   -3.652002    0.099020 
H       1.450922   -3.064093   -3.312265 
H       1.262338   -1.364781   -3.696648 
H       3.617558   -2.054932   -3.093380 
H       3.090120   -2.427068   -1.466942 
H       2.667260    0.313637   -2.760917 
H       4.158850   -0.092011   -1.891656 
H      -5.047319    0.344961    0.616852 
H      -6.361685   -0.955846    2.245616 
H      -5.325061   -2.860139    3.442011 
H      -2.961760   -3.452079    3.006377 
H      -1.633725   -2.127993    1.389351 
H      -3.744684    1.980154   -2.161580 
H      -4.399213    4.314056   -1.817656 
H      -3.913231    5.446933    0.327175 
H      -2.748484    4.213428    2.135356 
H      -2.062900    1.868269    1.795323 
H       1.713756   -2.019190    1.457989 
H       3.157140   -3.363180    2.955260 
H       5.563212   -2.821954    3.166577 
H       6.523431   -0.941443    1.873396 
H       5.093291    0.379537    0.364313 
H       3.004207    2.363946   -2.231407 
H       3.570228    4.706914   -1.800685 
H       3.661929    5.567138    0.517580 
H       3.163925    4.050021    2.413917 
H       2.591981    1.687382    1.993080 

72
REACTION E. ANTI_ISOMER, PBE0, 
G_raw (298.15 K) = -2738.090364 Hartree
C       2.358347    2.470927    0.977790 
C       2.715098    1.841318   -0.219455 
C       3.336124    2.585273   -1.223356 
C       3.602979    3.937170   -1.030254 
C       3.252650    4.555010    0.163125 
C       2.630576    3.818438    1.166521 
P       2.298985    0.065667   -0.401491 
C       3.379580   -0.742970    0.837447 
C       2.906776   -1.813945    1.593389 
C       3.755547   -2.476871    2.473831 
C       5.076304   -2.069494    2.610104 
C       5.550828   -0.992196    1.867597 
C       4.707117   -0.331528    0.985520 
Ir      0.000000   -0.157105   -0.300508 
Si      0.000001   -2.070643   -1.612857 
C       1.478367   -2.240139   -2.800620 
C       2.882976   -1.930593   -2.287238 
C       3.095644   -0.448299   -1.972850 
Cl     -0.000001   -0.167469    2.161937 
P      -2.298986    0.065666   -0.401491 
C      -2.715100    1.841316   -0.219458 
C      -3.336129    2.585269   -1.223359 
C      -3.602985    3.937166   -1.030259 
C      -3.252654    4.555009    0.163118 
C      -2.630576    3.818438    1.166514 
C      -2.358346    2.470928    0.977785 
C      -3.095644   -0.448305   -1.972849 
C      -2.882975   -1.930598   -2.287235 
C      -1.478366   -2.240144   -2.800618 
C      -3.379579   -0.742971    0.837448 
C      -4.707115   -0.331526    0.985526 
C      -5.550825   -0.992195    1.867603 
C      -5.076302   -2.069494    2.610107 
C      -3.755546   -2.476874    2.473830 
C      -2.906776   -1.813948    1.593388 
C       0.000005   -3.611094   -0.505865 
H       0.000000    0.293603   -1.807277 
H      -4.163331   -0.219435   -1.894912 
H      -2.672613    0.165444   -2.775214 
H      -3.623586   -2.216155   -3.043485 
H      -3.116659   -2.535941   -1.402507 
H      -1.274281   -1.611142   -3.677940 
H      -1.448611   -3.276676   -3.163923 
H       0.882653   -3.650114    0.137779 
H       0.000004   -4.511887   -1.131931 
H      -0.882638   -3.650115    0.137785 
H       1.448613   -3.276671   -3.163927 
H       1.274281   -1.611137   -3.677941 
H       3.623587   -2.216147   -3.043489 
H       3.116662   -2.535936   -1.402512 
H       2.672612    0.165450   -2.775213 
H       4.163330   -0.219428   -1.894914 
H      -5.080558    0.516893    0.419283 
H      -6.578769   -0.663257    1.979895 
H      -5.735747   -2.583930    3.301579 
H      -3.376978   -3.305936    3.062440 
H      -1.865289   -2.101329    1.511579 
H      -3.618878    2.121047   -2.161421 
H      -4.087214    4.506152   -1.817236 
H      -3.461596    5.609399    0.311302 
H      -2.351127    4.296025    2.099795 
H      -1.860133    1.900362    1.756381 
H       1.865288   -2.101324    1.511584 
H       3.376979   -3.305931    3.062443 
H       5.735750   -2.583929    3.301576 
H       6.578773   -0.663261    1.979886 
H       5.080560    0.516889    0.419275 
H       3.618871    2.121054   -2.161420 
H       4.087206    4.506158   -1.817232 
H       3.461592    5.609400    0.311310 
H       2.351129    4.296022    2.099803 
H       1.860137    1.900359    1.756386 

72
REACTION E. ANTI_ISOMER, PBE, 
G_raw (298.15 K) = -2737.878670 Hartree
C       2.346711    2.496889    0.971683 
C       2.720677    1.857698   -0.226778 
C       3.351682    2.604232   -1.236591 
C       3.611124    3.967908   -1.047054 
C       3.244081    4.595522    0.147516 
C       2.612395    3.856126    1.156052 
P       2.307793    0.064511   -0.401522 
C       3.408768   -0.737765    0.848654 
C       2.943255   -1.823247    1.607283 
C       3.804175   -2.481863    2.493976 
C       5.129263   -2.056808    2.634617 
C       5.595059   -0.965073    1.890186 
C       4.739770   -0.307237    1.001405 
Ir      0.000000   -0.171665   -0.300022 
Si      0.000001   -2.098240   -1.625565 
C       1.490841   -2.266688   -2.820731 
C       2.902611   -1.949402   -2.303924 
C       3.115851   -0.458404   -1.985370 
Cl     -0.000001   -0.189987    2.186670 
P      -2.307793    0.064510   -0.401522 
C      -2.720678    1.857697   -0.226780 
C      -3.351683    2.604230   -1.236594 
C      -3.611125    3.967905   -1.047058 
C      -3.244083    4.595521    0.147512 
C      -2.612396    3.856126    1.156048 
C      -2.346712    2.496889    0.971681 
C      -3.115851   -0.458407   -1.985369 
C      -2.902610   -1.949405   -2.303922 
C      -1.490840   -2.266691   -2.820729 
C      -3.408768   -0.737766    0.848654 
C      -4.739768   -0.307235    1.001409 
C      -5.595057   -0.965071    1.890190 
C      -5.129262   -2.056808    2.634619 
C      -3.804175   -2.481865    2.493974 
C      -2.943256   -1.823249    1.607281 
C       0.000004   -3.647518   -0.507265 
H       0.000000    0.300165   -1.812646 
H      -4.190366   -0.227855   -1.903239 
H      -2.691646    0.161683   -2.792489 
H      -3.649779   -2.233550   -3.065741 
H      -3.140410   -2.560044   -1.414728 
H      -1.283051   -1.636539   -3.705616 
H      -1.464692   -3.311376   -3.183410 
H       0.888149   -3.683561    0.140813 
H       0.000003   -4.555417   -1.135810 
H      -0.888137   -3.683561    0.140818 
H       1.464693   -3.311372   -3.183413 
H       1.283050   -1.636534   -3.705617 
H       3.649780   -2.233544   -3.065744 
H       3.140411   -2.560041   -1.414731 
H       2.691645    0.161687   -2.792489 
H       4.190366   -0.227851   -1.903239 
H      -5.106574    0.553127    0.434666 
H      -6.625841   -0.621500    2.005982 
H      -5.798062   -2.568321    3.330998 
H      -3.431333   -3.321904    3.084653 
H      -1.897404   -2.122747    1.523128 
H      -3.647777    2.132850   -2.175588 
H      -4.103151    4.538553   -1.838436 
H      -3.447186    5.659204    0.292124 
H      -2.319372    4.340811    2.090327 
H      -1.839080    1.924066    1.752989 
H       1.897403   -2.122743    1.523133 
H       3.431333   -3.321900    3.084657 
H       5.798063   -2.568321    3.330996 
H       6.625843   -0.621504    2.005975 
H       5.106576    0.553124    0.434660 
H       3.647776    2.132853   -2.175586 
H       4.103149    4.538557   -1.838431 
H       3.447183    5.659205    0.292130 
H       2.319371    4.340809    2.090331 
H       1.839079    1.924065    1.752991 

72
REACTION E. ANTI_ISOMER, B3LYP-D2, 
G_raw (298.15 K) =-2740.322587 Hartree
C       2.073499    2.569768    0.846792 
C       2.726153    1.870966   -0.178350 
C       3.629770    2.545238   -1.006227 
C       3.882914    3.902927   -0.807202 
C       3.235965    4.592432    0.216900 
C       2.332222    3.923062    1.043739 
P       2.308022    0.101272   -0.397305 
C       3.313481   -0.782918    0.845299 
C       2.784644   -1.917955    1.462868 
C       3.567310   -2.660955    2.345277 
C       4.875387   -2.265054    2.620938 
C       5.402617   -1.122485    2.015691 
C       4.624226   -0.383074    1.128569 
Ir     -0.000002   -0.126087   -0.329280 
Si     -0.000002   -2.022786   -1.675409 
C       1.486272   -2.145762   -2.857318 
C       2.893860   -1.878466   -2.300393 
C       3.135038   -0.396955   -1.963685 
Cl      0.000002   -0.189011    2.179063 
P      -2.308021    0.101268   -0.397306 
C      -2.726149    1.870964   -0.178359 
C      -3.629750    2.545238   -1.006250 
C      -3.882889    3.902930   -0.807231 
C      -3.235950    4.592433    0.216877 
C      -2.332222    3.923060    1.043731 
C      -2.073504    2.569764    0.846790 
C      -3.135045   -0.396964   -1.963681 
C      -2.893856   -1.878472   -2.300395 
C      -1.486268   -2.145750   -2.857330 
C      -3.313482   -0.782912    0.845305 
C      -4.624227   -0.383063    1.128570 
C      -5.402620   -1.122465    2.015698 
C      -4.875391   -2.265030    2.620957 
C      -3.567314   -2.660934    2.345300 
C      -2.784647   -1.917943    1.462884 
C      -0.000022   -3.595055   -0.607811 
H      -0.000001    0.378817   -1.824156 
H      -4.205750   -0.202109   -1.853067 
H      -2.745844    0.241506   -2.762595 
H      -3.644366   -2.174154   -3.041521 
H      -3.083505   -2.494044   -1.413014 
H      -1.305478   -1.460745   -3.696253 
H      -1.457557   -3.160061   -3.278319 
H       0.883913   -3.654140    0.032793 
H      -0.000022   -4.475156   -1.264207 
H      -0.883972   -3.654125    0.032773 
H       1.457567   -3.160080   -3.278291 
H       1.305476   -1.460772   -3.696253 
H       3.644368   -2.174143   -3.041524 
H       3.083522   -2.494034   -1.413012 
H       2.745825    0.241510   -2.762597 
H       4.205742   -0.202093   -1.853082 
H      -5.028920    0.511358    0.666866 
H      -6.415668   -0.806615    2.238872 
H      -5.481311   -2.838560    3.313700 
H      -3.150396   -3.538058    2.827200 
H      -1.755374   -2.186468    1.270583 
H      -4.133808    2.021582   -1.809137 
H      -4.583601    4.419592   -1.453621 
H      -3.432604    5.647907    0.368447 
H      -1.824572    4.456287    1.839613 
H      -1.368171    2.046611    1.482471 
H       1.755371   -2.186477    1.270561 
H       3.150391   -3.538082    2.827169 
H       5.481306   -2.838592    3.313677 
H       6.415666   -0.806639    2.238867 
H       5.028921    0.511351    0.666874 
H       4.133836    2.021582   -1.809109 
H       4.583637    4.419587   -1.453581 
H       3.432622    5.647904    0.368475 
H       1.824564    4.456290    1.839615 
H       1.368155    2.046618    1.482462 

72
REACTION E. ANTI_ISOMER, PBE-D2, 
G_raw (298.15 K) =    -2737.992750 Hartree
C       2.053411    2.565401    0.861614 
C       2.701937    1.876217   -0.180874 
C       3.593166    2.564023   -1.021448 
C       3.837097    3.928802   -0.817063 
C       3.194081    4.610232    0.223070 
C       2.303793    3.925770    1.062256 
P       2.291317    0.098340   -0.401022 
C       3.310973   -0.772449    0.849408 
C       2.786585   -1.916541    1.468616 
C       3.576882   -2.653303    2.358782 
C       4.885307   -2.241121    2.640189 
C       5.405527   -1.088615    2.033944 
C       4.620924   -0.354185    1.138298 
Ir     -0.001224   -0.139343   -0.325777 
Si      0.004906   -2.028049   -1.682600 
C       1.490306   -2.140210   -2.878020 
C       2.894414   -1.876734   -2.310116 
C       3.134586   -0.395990   -1.967183 
Cl     -0.004501   -0.205369    2.156161 
P      -2.293976    0.091299   -0.402066 
C      -2.707101    1.869723   -0.193478 
C      -3.592609    2.553223   -1.043490 
C      -3.836453    3.919419   -0.848571 
C      -3.199138    4.606287    0.191490 
C      -2.314702    3.925985    1.040252 
C      -2.064282    2.564292    0.848999 
C      -3.137255   -0.417831   -1.963058 
C      -2.898229   -1.903134   -2.287060 
C      -1.495729   -2.173432   -2.855355 
C      -3.311124   -0.773341    0.854371 
C      -4.616000   -0.346775    1.153492 
C      -5.399807   -1.078892    2.051803 
C      -4.883960   -2.237386    2.650187 
C      -3.580556   -2.658229    2.358205 
C      -2.791096   -1.923783    1.465535 
C       0.043989   -3.609970   -0.617063 
H      -0.001251    0.361490   -1.830568 
H      -4.214142   -0.215497   -1.839570 
H      -2.748992    0.221073   -2.774093 
H      -3.664450   -2.211752   -3.019491 
H      -3.078904   -2.513292   -1.383022 
H      -1.320869   -1.496477   -3.712782 
H      -1.460962   -3.201676   -3.262651 
H       0.965558   -3.673879   -0.017875 
H       0.010208   -4.490454   -1.284444 
H      -0.813564   -3.671459    0.070350 
H       1.457611   -3.159839   -3.306751 
H       1.306737   -1.445600   -3.719161 
H       3.659425   -2.175688   -3.047811 
H       3.076752   -2.498860   -1.414470 
H       2.747732    0.253010   -2.770862 
H       4.211700   -0.196459   -1.841000 
H      -5.010338    0.564395    0.694238 
H      -6.412112   -0.743197    2.289973 
H      -5.497122   -2.805979    3.353705 
H      -3.171378   -3.550731    2.837611 
H      -1.757597   -2.204519    1.255911 
H      -4.089911    2.027951   -1.861695 
H      -4.524738    4.446831   -1.513555 
H      -3.388905    5.672236    0.338614 
H      -1.812860    4.459440    1.851211 
H      -1.369802    2.026063    1.500770 
H       1.749817   -2.190812    1.267244 
H       3.164301   -3.540894    2.844361 
H       5.499105   -2.811569    3.341658 
H       6.421784   -0.759352    2.264130 
H       5.018561    0.552925    0.673818 
H       4.094885    2.043249   -1.839822 
H       4.529929    4.459371   -1.474776 
H       3.383989    5.675097    0.377667 
H       1.797458    4.454860    1.873290 
H       1.354702    2.024075    1.506276 

72
REACTION E. ANTI_ISOMER, B3LYP-D3, 
G_raw (298.15 K) =    -2740.272071 Hartree
C       2.321148    2.492757    0.963577 
C       2.740664    1.860991   -0.216631 
C       3.413192    2.605276   -1.191280 
C       3.667889    3.961435   -0.985883 
C       3.254075    4.582270    0.189820 
C       2.581268    3.844136    1.164221 
P       2.319019    0.082550   -0.413012 
C       3.364187   -0.753572    0.844633 
C       2.863241   -1.851657    1.547737 
C       3.679696   -2.543947    2.440316 
C       4.996570   -2.137894    2.642756 
C       5.498227   -1.033149    1.953510 
C       4.686486   -0.343510    1.057826 
Ir      0.000000   -0.136582   -0.333378 
Si      0.000001   -2.085464   -1.618624 
C       1.486258   -2.254047   -2.805176 
C       2.901089   -1.942780   -2.290264 
C       3.130266   -0.451590   -1.981575 
Cl     -0.000002   -0.158341    2.178364 
P      -2.319019    0.082549   -0.413013 
C      -2.740665    1.860990   -0.216634 
C      -3.413193    2.605274   -1.191282 
C      -3.667891    3.961432   -0.985886 
C      -3.254077    4.582269    0.189816 
C      -2.581269    3.844136    1.164217 
C      -2.321149    2.492757    0.963574 
C      -3.130266   -0.451594   -1.981574 
C      -2.901088   -1.942784   -2.290261 
C      -1.486258   -2.254051   -2.805174 
C      -3.364187   -0.753572    0.844634 
C      -4.686486   -0.343511    1.057828 
C      -5.498226   -1.033149    1.953513 
C      -4.996568   -2.137894    2.642759 
C      -3.679693   -2.543946    2.440319 
C      -2.863240   -1.851657    1.547739 
C       0.000005   -3.625561   -0.502866 
H       0.000000    0.318088   -1.843490 
H      -4.198847   -0.238281   -1.892969 
H      -2.723394    0.163281   -2.789160 
H      -3.637441   -2.235806   -3.046579 
H      -3.132475   -2.544500   -1.403871 
H      -1.281828   -1.623845   -3.680017 
H      -1.460091   -3.289711   -3.168425 
H       0.882496   -3.663825    0.138956 
H       0.000001   -4.524831   -1.129860 
H      -0.882480   -3.663824    0.138965 
H       1.460092   -3.289707   -3.168429 
H       1.281827   -1.623841   -3.680018 
H       3.637442   -2.235800   -3.046582 
H       3.132477   -2.544497   -1.403874 
H       2.723393    0.163286   -2.789160 
H       4.198846   -0.238277   -1.892969 
H      -5.078994    0.521786    0.534516 
H      -6.519091   -0.706707    2.117531 
H      -5.629050   -2.672851    3.342383 
H      -3.280140   -3.391186    2.985915 
H      -1.829038   -2.136785    1.417318 
H      -3.744771    2.142305   -2.112160 
H      -4.190571    4.529905   -1.747010 
H      -3.452480    5.636604    0.346120 
H      -2.253621    4.322341    2.080290 
H      -1.785889    1.923392    1.715439 
H       1.829040   -2.136786    1.417317 
H       3.280143   -3.391188    2.985912 
H       5.629054   -2.672851    3.342379 
H       6.519092   -0.706706    2.117528 
H       5.078993    0.521787    0.534515 
H       3.744769    2.142309   -2.112158 
H       4.190569    4.529908   -1.747006 
H       3.452478    5.636605    0.346125 
H       2.253620    4.322340    2.080294 
H       1.785889    1.923392    1.715442 

72
REACTION E. ANTI_ISOMER, M06L-D3, 
G_raw (298.15 K) = -2739.930778 Hartree
C       2.180376    2.485743    0.917691 
C       2.662264    1.841203   -0.229452 
C       3.348949    2.583223   -1.192915 
C       3.554913    3.947882   -1.009460 
C       3.079672    4.579842    0.133477 
C       2.393876    3.845412    1.097503 
P       2.299231    0.058702   -0.398475 
C       3.380570   -0.721208    0.851685 
C       2.938487   -1.835673    1.566179 
C       3.792649   -2.480361    2.454931 
C       5.088457   -2.012500    2.641505 
C       5.532928   -0.895203    1.939447 
C       4.683864   -0.252889    1.047932 
Ir      0.000000   -0.183756   -0.306824 
Si      0.000000   -2.089079   -1.639942 
C       1.486733   -2.234721   -2.812449 
C       2.885371   -1.938090   -2.276063 
C       3.108943   -0.457533   -1.959620 
Cl     -0.000001   -0.249423    2.199019 
P      -2.299231    0.058703   -0.398475 
C      -2.662264    1.841204   -0.229452 
C      -3.348949    2.583224   -1.192914 
C      -3.554912    3.947884   -1.009459 
C      -3.079669    4.579844    0.133477 
C      -2.393873    3.845413    1.097503 
C      -2.180375    2.485744    0.917690 
C      -3.108943   -0.457533   -1.959620 
C      -2.885371   -1.938089   -2.276063 
C      -1.486733   -2.234721   -2.812449 
C      -3.380570   -0.721208    0.851685 
C      -4.683864   -0.252888    1.047932 
C      -5.532929   -0.895203    1.939447 
C      -5.088457   -2.012500    2.641505 
C      -3.792649   -2.480361    2.454931 
C      -2.938487   -1.835673    1.566179 
C       0.000000   -3.624027   -0.534773 
H       0.000000    0.266118   -1.828513 
H      -4.178184   -0.232914   -1.875228 
H      -2.702337    0.162821   -2.766638 
H      -3.639708   -2.239875   -3.012086 
H      -3.096568   -2.544617   -1.383820 
H      -1.297269   -1.590043   -3.681880 
H      -1.461511   -3.262311   -3.201247 
H       0.880134   -3.665180    0.112032 
H      -0.000001   -4.531017   -1.151480 
H      -0.880134   -3.665179    0.112033 
H       1.461510   -3.262311   -3.201247 
H       1.297269   -1.590043   -3.681880 
H       3.639708   -2.239876   -3.012085 
H       3.096567   -2.544618   -1.383820 
H       2.702337    0.162821   -2.766638 
H       4.178184   -0.232915   -1.875228 
H      -5.033635    0.623141    0.506526 
H      -6.541117   -0.522372    2.089831 
H      -5.751761   -2.512775    3.340079 
H      -3.439544   -3.343135    3.010482 
H      -1.914600   -2.173167    1.439966 
H      -3.728784    2.105545   -2.090588 
H      -4.089853    4.516118   -1.763810 
H      -3.240660    5.644147    0.272083 
H      -2.019208    4.334844    1.991048 
H      -1.633612    1.911219    1.662979 
H       1.914600   -2.173168    1.439966 
H       3.439544   -3.343135    3.010482 
H       5.751761   -2.512775    3.340079 
H       6.541117   -0.522373    2.089831 
H       5.033634    0.623141    0.506526 
H       3.728783    2.105544   -2.090590 
H       4.089854    4.516116   -1.763810 
H       3.240663    5.644145    0.272083 
H       2.019212    4.334843    1.991049 
H       1.633614    1.911218    1.662979 

72
REACTION E. ANTI_ISOMER, PBE0-D3, 
G_raw (298.15 K) =-2738.159291 Hartree
C       2.282416    2.470024    0.962606 
C       2.696785    1.845746   -0.218721 
C       3.355034    2.592179   -1.195907 
C       3.600711    3.946443   -0.991573 
C       3.191585    4.561194    0.184991 
C       2.533293    3.819803    1.161874 
P       2.290301    0.073926   -0.412520 
C       3.340332   -0.743635    0.837806 
C       2.850973   -1.842655    1.540220 
C       3.674354   -2.525277    2.428582 
C       4.984483   -2.106831    2.625972 
C       5.473293   -1.000062    1.937482 
C       4.655027   -0.320017    1.045913 
Ir      0.000000   -0.145573   -0.317890 
Si      0.000003   -2.064853   -1.612018 
C       1.479022   -2.235216   -2.795343 
C       2.882225   -1.929724   -2.274362 
C       3.101817   -0.445887   -1.970814 
Cl      0.000001   -0.177177    2.143358 
P      -2.290302    0.073922   -0.412519 
C      -2.696788    1.845742   -0.218726 
C      -3.355037    2.592171   -1.195915 
C      -3.600715    3.946436   -0.991586 
C      -3.191592    4.561191    0.184977 
C      -2.533301    3.819803    1.161863 
C      -2.282422    2.470024    0.962600 
C      -3.101817   -0.445895   -1.970812 
C      -2.882223   -1.929733   -2.274356 
C      -1.479020   -2.235224   -2.795338 
C      -3.340331   -0.743637    0.837808 
C      -4.655026   -0.320018    1.045918 
C      -5.473291   -1.000062    1.937489 
C      -4.984481   -2.106832    2.625976 
C      -3.674353   -2.525279    2.428583 
C      -2.850974   -1.842659    1.540220 
C       0.000011   -3.606471   -0.509260 
H       0.000000    0.297565   -1.827568 
H      -4.169439   -0.222137   -1.878493 
H      -2.689656    0.166914   -2.779382 
H      -3.627032   -2.227033   -3.021578 
H      -3.104838   -2.527598   -1.381265 
H      -1.277830   -1.603293   -3.671016 
H      -1.447023   -3.271290   -3.159182 
H       0.883318   -3.650257    0.132583 
H       0.000005   -4.501275   -1.143474 
H      -0.883284   -3.650257    0.132600 
H       1.447027   -3.271281   -3.159190 
H       1.277829   -1.603282   -3.671019 
H       3.627034   -2.227020   -3.021586 
H       3.104842   -2.527591   -1.381273 
H       2.689655    0.166924   -2.779383 
H       4.169439   -0.222126   -1.878495 
H      -5.035224    0.551150    0.519881 
H      -6.492153   -0.663849    2.099727 
H      -5.624561   -2.635985    3.324512 
H      -3.284846   -3.376986    2.976237 
H      -1.815877   -2.133428    1.408367 
H      -3.681935    2.128853   -2.120096 
H      -4.113807    4.520286   -1.756396 
H      -3.383249    5.617797    0.340582 
H      -2.208677    4.295608    2.081310 
H      -1.756762    1.891801    1.717368 
H       1.815875   -2.133423    1.408368 
H       3.284846   -3.376982    2.976236 
H       5.624563   -2.635985    3.324506 
H       6.492156   -0.663851    2.099718 
H       5.035226    0.551149    0.519874 
H       3.681935    2.128864   -2.120089 
H       4.113803    4.520297   -1.756381 
H       3.383240    5.617800    0.340599 
H       2.208667    4.295604    2.081321 
H       1.756755    1.891798    1.717371 

72
REACTION E. ANTI_ISOMER, PBE-D3, 
G_raw (298.15 K) = -2737.946090 Hartree
C       2.225826    2.497279    0.945128 
C       2.674688    1.863086   -0.230008 
C       3.337655    2.616557   -1.212910 
C       3.553390    3.987245   -1.019642 
C       3.110028    4.612095    0.150600 
C       2.447514    3.863498    1.132627 
P       2.297130    0.067619   -0.409989 
C       3.384308   -0.726219    0.848316 
C       2.921023   -1.843314    1.560051 
C       3.769728   -2.507118    2.453419 
C       5.078810   -2.052941    2.647442 
C       5.540270   -0.928310    1.950300 
C       4.697128   -0.265598    1.053462 
Ir      0.000000   -0.178355   -0.309719 
Si      0.000002   -2.106410   -1.621281 
C       1.493282   -2.274172   -2.810334 
C       2.902096   -1.952942   -2.286146 
C       3.116249   -0.458070   -1.983765 
Cl     -0.000001   -0.234708    2.174887 
P      -2.297131    0.067617   -0.409989 
C      -2.674689    1.863084   -0.230012 
C      -3.337656    2.616553   -1.212916 
C      -3.553392    3.987241   -1.019650 
C      -3.110031    4.612094    0.150590 
C      -2.447518    3.863499    1.132619 
C      -2.225829    2.497279    0.945124 
C      -3.116249   -0.458076   -1.983763 
C      -2.902095   -1.952949   -2.286141 
C      -1.493281   -2.274178   -2.810330 
C      -3.384308   -0.726219    0.848318 
C      -4.697127   -0.265598    1.053466 
C      -5.540268   -0.928309    1.950306 
C      -5.078808   -2.052940    2.647445 
C      -3.769727   -2.507119    2.453420 
C      -2.921023   -1.843315    1.560051 
C       0.000008   -3.650133   -0.498514 
H       0.000000    0.295769   -1.822230 
H      -4.190024   -0.227171   -1.894131 
H      -2.695830    0.156751   -2.796700 
H      -3.655202   -2.249114   -3.037172 
H      -3.130415   -2.551905   -1.386084 
H      -1.286640   -1.645317   -3.696204 
H      -1.470242   -3.319651   -3.170320 
H       0.888542   -3.683431    0.148608 
H       0.000004   -4.558960   -1.125313 
H      -0.888518   -3.683431    0.148618 
H       1.470244   -3.319644   -3.170327 
H       1.286639   -1.645309   -3.696206 
H       3.655202   -2.249104   -3.037179 
H       3.130417   -2.551900   -1.386090 
H       2.695829    0.156758   -2.796700 
H       4.190024   -0.227164   -1.894132 
H      -5.056579    0.619857    0.521594 
H      -6.557785   -0.563466    2.109762 
H      -5.738549   -2.567847    3.349920 
H      -3.400338   -3.372773    3.008070 
H      -1.885356   -2.161037    1.431540 
H      -3.691120    2.145357   -2.132100 
H      -4.070294    4.566136   -1.788798 
H      -3.277913    5.681689    0.296679 
H      -2.095493    4.346638    2.047094 
H      -1.695113    1.913182    1.702791 
H       1.885355   -2.161034    1.431542 
H       3.400339   -3.372770    3.008070 
H       5.738551   -2.567848    3.349915 
H       6.557788   -0.563469    2.109755 
H       5.056580    0.619855    0.521589 
H       3.691120    2.145363   -2.132095 
H       4.070293    4.566142   -1.788788 
H       3.277910    5.681690    0.296690 
H       2.095489    4.346636    2.047103 
H       1.695110    1.913180    1.702794 

72
REACTION E. ANTI_ISOMER, PBE-D3BJ, 
G_raw (298.15 K) = -2738.009960 Hartree
C       2.290073    2.486594    0.967773 
C       2.710130    1.855008   -0.218542 
C       3.378097    2.601712   -1.202199 
C       3.627886    3.964636   -0.998832 
C       3.213762    4.587432    0.182715 
C       2.546118    3.844910    1.165509 
P       2.295323    0.073535   -0.414183 
C       3.348191   -0.748000    0.849299 
C       2.853097   -1.862402    1.541902 
C       3.674604   -2.549379    2.442284 
C       4.987776   -2.119905    2.661492 
C       5.480514   -0.997541    1.982936 
C       4.664402   -0.311886    1.078909 
Ir      0.000000   -0.147012   -0.326892 
Si      0.000000   -2.072938   -1.636289 
C       1.491091   -2.242257   -2.823098 
C       2.898311   -1.942843   -2.286328 
C       3.124350   -0.452681   -1.978961 
Cl     -0.000001   -0.174338    2.151342 
P      -2.295324    0.073535   -0.414183 
C      -2.710130    1.855008   -0.218542 
C      -3.378097    2.601712   -1.202199 
C      -3.627885    3.964636   -0.998833 
C      -3.213761    4.587432    0.182715 
C      -2.546117    3.844910    1.165509 
C      -2.290073    2.486594    0.967773 
C      -3.124351   -0.452682   -1.978961 
C      -2.898312   -1.942844   -2.286328 
C      -1.491092   -2.242258   -2.823097 
C      -3.348191   -0.748000    0.849298 
C      -4.664401   -0.311885    1.078910 
C      -5.480514   -0.997541    1.982936 
C      -4.987776   -2.119905    2.661492 
C      -3.674604   -2.549379    2.442284 
C      -2.853098   -1.862403    1.541901 
C       0.000002   -3.624086   -0.525766 
H       0.000000    0.316040   -1.842671 
H      -4.198850   -0.231499   -1.877069 
H      -2.717529    0.167073   -2.794711 
H      -3.654859   -2.246650   -3.030204 
H      -3.108910   -2.545151   -1.384607 
H      -1.296474   -1.599442   -3.701288 
H      -1.457689   -3.282759   -3.195689 
H       0.888909   -3.666840    0.120124 
H       0.000000   -4.524966   -1.163807 
H      -0.888903   -3.666839    0.120129 
H       1.457688   -3.282757   -3.195691 
H       1.296473   -1.599440   -3.701289 
H       3.654859   -2.246649   -3.030204 
H       3.108909   -2.545151   -1.384608 
H       2.717529    0.167074   -2.794710 
H       4.198850   -0.231499   -1.877069 
H      -5.045602    0.572196    0.560734 
H      -6.501292   -0.652578    2.162911 
H      -5.626616   -2.652434    3.369760 
H      -3.281524   -3.413026    2.983184 
H      -1.813854   -2.156639    1.391183 
H      -3.708416    2.129838   -2.129245 
H      -4.148493    4.539097   -1.768485 
H      -3.408496    5.651039    0.337227 
H      -2.217336    4.327189    2.088775 
H      -1.754544    1.906277    1.724497 
H       1.813854   -2.156638    1.391184 
H       3.281524   -3.413026    2.983185 
H       5.626616   -2.652435    3.369760 
H       6.501292   -0.652579    2.162909 
H       5.045602    0.572195    0.560733 
H       3.708416    2.129837   -2.129244 
H       4.148494    4.539096   -1.768485 
H       3.408497    5.651039    0.337228 
H       2.217337    4.327189    2.088775 
H       1.754544    1.906277    1.724498 

72
REACTION E. SYN_ISOMER, B3LYP, 
G_raw (298.15 K) = -2740.163564 Hartree
C      -3.060040    2.754089    0.690542 
C      -2.895553    1.750270   -0.272686 
C      -3.074960    2.071774   -1.625326 
C      -3.431544    3.363521   -2.003972 
C      -3.611217    4.351637   -1.038037 
C      -3.422978    4.043315    0.307463 
P      -2.337934    0.056286    0.203965 
C      -3.182685   -0.302506    1.810957 
C      -2.918292   -1.731771    2.317770 
C      -1.494914   -1.948475    2.857896 
Si     -0.000003   -1.941199    1.662797 
C       1.494930   -1.948518    2.857869 
C       2.918304   -1.731812    2.317729 
C       3.182698   -0.302539    1.810940 
P       2.337938    0.056277    0.203958 
Ir      0.000003   -0.037768    0.291412 
H      -0.000001   -0.930791   -1.002526 
C       2.895551    1.750265   -0.272681 
C       3.060131    2.754058    0.690559 
C       3.423059    4.043287    0.307481 
C       3.611194    4.351639   -1.038026 
C       3.431428    3.363550   -2.003971 
C       3.074854    2.071800   -1.625327 
C       3.260312   -1.023759   -0.982301 
C       2.599796   -1.964145   -1.776467 
C       3.315059   -2.785512   -2.648861 
C       4.699332   -2.675303   -2.736505 
C       5.369575   -1.737893   -1.949877 
C       4.656485   -0.918792   -1.080591 
C      -0.000037   -3.596961    0.729308 
C      -3.260314   -1.023760   -0.982282 
C      -2.599787   -1.964072   -1.776527 
C      -3.315049   -2.785435   -2.648925 
C      -4.699332   -2.675297   -2.736495 
C      -5.369587   -1.737962   -1.949787 
C      -4.656498   -0.918864   -1.080497 
H      -0.000081   -4.428012    1.444212 
H      -0.882992   -3.704262    0.093929 
H       0.882943   -3.704321    0.093972 
H       2.888258    2.542524    1.737356 
H       3.550681    4.808762    1.064532 
H       3.890761    5.356922   -1.332515 
H       3.569491    3.595817   -3.054044 
H       2.945626    1.311151   -2.386274 
H       5.192263   -0.185811   -0.488127 
H       6.447580   -1.642755   -2.015782 
H       5.255411   -3.312860   -3.414584 
H       2.786723   -3.509822   -3.258623 
H       1.523031   -2.046165   -1.710099 
H      -2.945805    1.311106   -2.386265 
H      -3.569688    3.595765   -3.054040 
H      -3.890791    5.356918   -1.332528 
H      -3.550526    4.808811    1.064505 
H      -2.888083    2.542579    1.737330 
H      -1.523015   -2.046036   -1.710216 
H      -2.786704   -3.509686   -3.258749 
H      -5.255410   -3.312852   -3.414577 
H      -6.447600   -1.642880   -2.015633 
H      -5.192287   -0.185941   -0.487973 
H       4.253932   -0.124750    1.687353 
H       2.798322    0.421964    2.532642 
H       3.639925   -1.925507    3.119634 
H       3.152138   -2.457512    1.530504 
H       1.457512   -2.920744    3.368462 
H       1.290903   -1.193181    3.624972 
H      -1.457495   -2.920687    3.368514 
H      -1.290868   -1.193118    3.624975 
H      -3.152141   -2.457485    1.530562 
H      -3.639905   -1.925445    3.119688 
H      -4.253919   -0.124713    1.687379 
H      -2.798300    0.422009    2.532643 
Cl      0.000022    1.550146    2.276849 

72
REACTION E. SYN_ISOMER, M06L, 
G_raw (298.15 K) =     -2739.921331 Hartree
C      -2.924144    2.762772    0.619118 
C      -2.890056    1.725522   -0.319963 
C      -3.215243    2.000831   -1.652573 
C      -3.592573    3.283341   -2.032890 
C      -3.643924    4.304936   -1.090275 
C      -3.306720    4.041681    0.233730 
P      -2.311701    0.065740    0.181055 
C      -3.147126   -0.232118    1.787213 
C      -2.893834   -1.639668    2.324566 
C      -1.476233   -1.829245    2.855395 
Si     -0.000025   -1.861975    1.660442 
C       1.476192   -1.829288    2.855384 
C       2.893793   -1.639750    2.324541 
C       3.147124   -0.232201    1.787206 
P       2.311702    0.065703    0.181055 
Ir     -0.000002   -0.003207    0.248515 
H      -0.000016   -0.895341   -1.052406 
C       2.890095    1.725479   -0.319938 
C       2.924254    2.762706    0.619164 
C       3.306860    4.041611    0.233791 
C       3.644025    4.304884   -1.090221 
C       3.592605    3.283311   -2.032857 
C       3.215245    2.000806   -1.652554 
C       3.227355   -1.056376   -0.940688 
C       2.576728   -2.046149   -1.677017 
C       3.300670   -2.909234   -2.495466 
C       4.681788   -2.789683   -2.586872 
C       5.341649   -1.803293   -1.857594 
C       4.620466   -0.944829   -1.039202 
C      -0.000059   -3.524923    0.770113 
C      -3.227377   -1.056339   -0.940668 
C      -2.576770   -2.046141   -1.676977 
C      -3.300732   -2.909228   -2.495408 
C      -4.681847   -2.789649   -2.586816 
C      -5.341687   -1.803229   -1.857560 
C      -4.620485   -0.944763   -1.039185 
H       0.000016   -4.340621    1.502909 
H      -0.883472   -3.652634    0.137721 
H       0.883251   -3.652604    0.137573 
H       2.626907    2.575173    1.646148 
H       3.334361    4.837301    0.971432 
H       3.940189    5.305646   -1.387946 
H       3.847345    3.483912   -3.068650 
H       3.180846    1.206850   -2.393490 
H       5.142658   -0.168322   -0.485781 
H       6.419852   -1.702684   -1.928807 
H       5.245920   -3.460836   -3.226572 
H       2.781524   -3.674972   -3.063029 
H       1.497044   -2.131048   -1.609169 
H      -3.180899    1.206857   -2.393492 
H      -3.847343    3.483928   -3.068679 
H      -3.940065    5.305702   -1.388011 
H      -3.334167    4.837388    0.971355 
H      -2.626764    2.575252    1.646095 
H      -1.497089   -2.131064   -1.609125 
H      -2.781602   -3.674990   -3.062953 
H      -5.245994   -3.460803   -3.226502 
H      -6.419888   -1.702598   -1.928774 
H      -5.142661   -0.168235   -0.485779 
H       4.217004   -0.036023    1.659802 
H       2.749541    0.512377    2.485695 
H       3.618302   -1.823275    3.127072 
H       3.128087   -2.384393    1.550062 
H       1.420441   -2.776347    3.411336 
H       1.264107   -1.037721    3.585859 
H      -1.420504   -2.776304    3.411349 
H      -1.264119   -1.037682    3.585867 
H      -3.128163   -2.384314    1.550102 
H      -3.618338   -1.823157    3.127110 
H      -4.217001   -0.035910    1.659814 
H      -2.749515    0.512456    2.485691 
Cl      0.000025    1.538902    2.279982 

72
REACTION E. SYN_ISOMER, M11L, 
G_raw (298.15 K) =    -2739.942568 Hartree
C      -2.975847    2.724920    0.668498 
C      -2.879720    1.715127   -0.282269 
C      -3.140866    2.015099   -1.614389 
C      -3.516516    3.290771   -1.983840 
C      -3.631181    4.283206   -1.029813 
C      -3.355729    3.997953    0.293203 
P      -2.307984    0.063416    0.184482 
C      -3.124365   -0.275418    1.767658 
C      -2.859493   -1.683529    2.260399 
C      -1.457893   -1.864361    2.799827 
Si     -0.000001   -1.881116    1.631927 
C       1.457888   -1.864354    2.799831 
C       2.859487   -1.683528    2.260400 
C       3.124362   -0.275418    1.767658 
P       2.307984    0.063416    0.184481 
Ir      0.000000   -0.022020    0.238248 
H       0.000000   -0.897949   -1.054180 
C       2.879722    1.715127   -0.282267 
C       2.975831    2.724920    0.668503 
C       3.355714    3.997954    0.293213 
C       3.631185    4.283209   -1.029798 
C       3.516537    3.290774   -1.983827 
C       3.140886    2.015100   -1.614383 
C       3.229773   -1.016628   -0.944552 
C       2.610525   -2.023729   -1.667914 
C       3.351347   -2.860686   -2.482439 
C       4.718077   -2.700688   -2.584487 
C       5.347084   -1.697817   -1.869286 
C       4.609291   -0.865699   -1.054274 
C       0.000002   -3.519196    0.753849 
C      -3.229772   -1.016627   -0.944552 
C      -2.610524   -2.023734   -1.667907 
C      -3.351345   -2.860691   -2.482431 
C      -4.718074   -2.700688   -2.584486 
C      -5.347080   -1.697812   -1.869294 
C      -4.609288   -0.865693   -1.054282 
H       0.000023   -4.346771    1.481927 
H      -0.883009   -3.662527    0.114293 
H       0.882994   -3.662509    0.114262 
H       2.725302    2.524947    1.711187 
H       3.430138    4.781095    1.049133 
H       3.930532    5.290907   -1.322111 
H       3.723849    3.510700   -3.032463 
H       3.058169    1.235044   -2.374704 
H       5.115912   -0.067662   -0.504277 
H       6.426608   -1.561638   -1.948183 
H       5.300052   -3.360580   -3.229895 
H       2.849167   -3.647093   -3.048324 
H       1.530064   -2.147758   -1.596346 
H      -3.058134    1.235042   -2.374709 
H      -3.723812    3.510696   -3.032478 
H      -3.930527    5.290903   -1.322130 
H      -3.430167    4.781094    1.049122 
H      -2.725335    2.524948    1.711187 
H      -1.530064   -2.147767   -1.596333 
H      -2.849166   -3.647103   -3.048310 
H      -5.300048   -3.360581   -3.229895 
H      -6.426604   -1.561627   -1.948197 
H      -5.115908   -0.067650   -0.504292 
H       4.202478   -0.079785    1.654368 
H       2.729923    0.451932    2.495886 
H       3.599937   -1.909209    3.045955 
H       3.072725   -2.412021    1.454317 
H       1.406635   -2.820963    3.354003 
H       1.267324   -1.080341    3.555026 
H      -1.406641   -2.820973    3.353993 
H      -1.267328   -1.080353    3.555028 
H      -3.072733   -2.412020    1.454315 
H      -3.599941   -1.909209    3.045955 
H      -4.202480   -0.079785    1.654365 
H      -2.729928    0.451930    2.495889 
Cl     -0.000006    1.525656    2.250046 

72
REACTION E. SYN_ISOMER, PBE0, 
G_raw (298.15 K) =        -2738.088719 Hartree
C      -2.928942    2.762755    0.652258 
C      -2.863744    1.734595   -0.292107 
C      -3.145340    2.019565   -1.630876 
C      -3.507367    3.305056   -2.014094 
C      -3.589448    4.318890   -1.066804 
C      -3.297669    4.044698    0.264471 
P      -2.305030    0.060152    0.202904 
C      -3.147883   -0.270209    1.799950 
C      -2.897445   -1.693429    2.301760 
C      -1.482413   -1.907753    2.836431 
Si     -0.000017   -1.901345    1.640685 
C       1.482413   -1.907846    2.836387 
C       2.897438   -1.693542    2.301690 
C       3.147902   -0.270311    1.799922 
P       2.305035    0.060114    0.202897 
Ir      0.000003   -0.013994    0.288302 
H      -0.000008   -0.894562   -1.008331 
C       2.863767    1.734558   -0.292083 
C       2.929145    2.762670    0.652321 
C       3.297879    4.044614    0.264542 
C       3.589486    4.318854   -1.066761 
C       3.507225    3.305067   -2.014087 
C       3.145190    2.019577   -1.630878 
C       3.215750   -1.033844   -0.956222 
C       2.552932   -1.980035   -1.734064 
C       3.265095   -2.817114   -2.588067 
C       4.646985   -2.714666   -2.671608 
C       5.318762   -1.770605   -1.900049 
C       4.608913   -0.936255   -1.048459 
C      -0.000082   -3.548518    0.710784 
C      -3.215772   -1.033821   -0.956180 
C      -2.552957   -1.979939   -1.734112 
C      -3.265133   -2.817016   -2.588108 
C      -4.647033   -2.714639   -2.671549 
C      -5.318808   -1.770651   -1.899900 
C      -4.608947   -0.936303   -1.048320 
H      -0.000137   -4.379459    1.426346 
H      -0.884796   -3.653445    0.076093 
H       0.884649   -3.653534    0.076130 
H       2.668605    2.570972    1.686717 
H       3.348829    4.833785    1.007388 
H       3.874436    5.322112   -1.366215 
H       3.726291    3.513066   -3.056309 
H       3.090321    1.232774   -2.376130 
H       5.143748   -0.193649   -0.464264 
H       6.398267   -1.682423   -1.964484 
H       5.202634   -3.366491   -3.337787 
H       2.735591   -3.549586   -3.188460 
H       1.473522   -2.051663   -1.665010 
H      -3.090611    1.232725   -2.376099 
H      -3.726568    3.513016   -3.056295 
H      -3.874392    5.322148   -1.366265 
H      -3.348477    4.833906    1.007288 
H      -2.668258    2.571091    1.686625 
H      -1.473539   -2.051512   -1.665133 
H      -2.735630   -3.549431   -3.188571 
H      -5.202693   -3.366462   -3.337721 
H      -6.398323   -1.682524   -1.964257 
H      -5.143784   -0.193754   -0.464054 
H       4.217015   -0.074552    1.675053 
H       2.746936    0.453563    2.516189 
H       3.622273   -1.888296    3.101232 
H       3.131438   -2.415685    1.509104 
H       1.436885   -2.877970    3.351642 
H       1.271244   -1.145624    3.596686 
H      -1.436900   -2.877856    3.351726 
H      -1.271199   -1.145502    3.596688 
H      -3.131484   -2.415594    1.509206 
H      -3.622266   -1.888136    3.101328 
H      -4.216993   -0.074424    1.675097 
H      -2.746885    0.453678    2.516186 
Cl      0.000046    1.509721    2.260335 

72
REACTION E. SYN_ISOMER, PBE, 
G_raw (298.15 K) =       -2737.878464 Hartree
C      -2.944663    2.783987    0.657874 
C      -2.875442    1.750417   -0.295091 
C      -3.150946    2.040372   -1.644553 
C      -3.513307    3.335693   -2.028974 
C      -3.600996    4.354708   -1.073623 
C      -3.313683    4.075418    0.267598 
P      -2.313541    0.060884    0.201237 
C      -3.174963   -0.275382    1.809075 
C      -2.918766   -1.703506    2.321224 
C      -1.497383   -1.915780    2.866351 
Si     -0.000015   -1.918907    1.666314 
C       1.497390   -1.915873    2.866307 
C       2.918764   -1.703617    2.321151 
C       3.174985   -0.275481    1.809045 
P       2.313545    0.060849    0.201230 
Ir      0.000003   -0.022083    0.297271 
H      -0.000008   -0.906938   -1.011618 
C       2.875461    1.750384   -0.295067 
C       2.944864    2.783906    0.657934 
C       3.313885    4.075340    0.267665 
C       3.601022    4.354678   -1.073583 
C       3.513155    3.335710   -2.028969 
C       3.150789    2.040389   -1.644555 
C       3.231962   -1.039093   -0.972274 
C       2.560824   -1.995295   -1.748716 
C       3.273148   -2.836860   -2.613008 
C       4.663942   -2.730039   -2.708699 
C       5.343306   -1.776778   -1.938455 
C       4.633522   -0.936816   -1.075938 
C      -0.000079   -3.582103    0.737804 
C      -3.231983   -1.039073   -0.972231 
C      -2.560843   -1.995197   -1.748768 
C      -3.273176   -2.836760   -2.613055 
C      -4.663984   -2.730016   -2.708644 
C      -5.343350   -1.776833   -1.938306 
C      -4.633556   -0.936872   -1.075796 
H      -0.000138   -4.414633    1.462612 
H      -0.890195   -3.690595    0.099148 
H       0.890056   -3.690686    0.099190 
H       2.685741    2.588866    1.699858 
H       3.368506    4.868356    1.017194 
H       3.885968    5.365573   -1.374463 
H       3.727712    3.547339   -3.079255 
H       3.091203    1.249697   -2.396030 
H       5.174657   -0.186628   -0.493453 
H       6.429518   -1.684902   -2.011994 
H       5.219886   -3.385541   -3.383149 
H       2.737108   -3.576664   -3.212316 
H       1.474261   -2.068789   -1.669281 
H      -3.091500    1.249644   -2.396001 
H      -3.728001    3.547284   -3.079240 
H      -3.885938    5.365603   -1.374509 
H      -3.368161    4.868472    1.017098 
H      -2.685393    2.588981    1.699768 
H      -1.474270   -2.068631   -1.669409 
H      -2.737135   -3.576502   -3.212436 
H      -5.219936   -3.385518   -3.383088 
H      -6.429573   -1.685017   -2.011765 
H      -5.174697   -0.186746   -0.493237 
H       4.251106   -0.084061    1.673369 
H       2.779227    0.459743    2.528191 
H       3.651888   -1.897161    3.124362 
H       3.150900   -2.435390    1.526543 
H       1.453512   -2.889421    3.391030 
H       1.285925   -1.142611    3.625801 
H      -1.453519   -2.889307    3.391116 
H      -1.285874   -1.142490    3.625804 
H      -3.150942   -2.435302    1.526649 
H      -3.651874   -1.897002    3.124462 
H      -4.251083   -0.083939    1.673418 
H      -2.779172    0.459856    2.528188 
Cl      0.000045    1.523907    2.285873 

72
REACTION E. SYN_ISOMER, B3LYP-D2, 
G_raw (298.15 K) =    -2740.322948 Hartree
C      -2.734606    2.825646    0.535926 
C      -2.873009    1.751099   -0.353315 
C      -3.349523    1.983541   -1.648860 
C      -3.703220    3.273070   -2.043696 
C      -3.581537    4.336996   -1.150824 
C      -3.095772    4.110326    0.137740 
P      -2.308653    0.092599    0.183168 
C      -3.161968   -0.213931    1.785723 
C      -2.907279   -1.645014    2.290937 
C      -1.484212   -1.857089    2.833844 
Si     -0.000039   -1.869981    1.640863 
C       1.484167   -1.857200    2.833803 
C       2.907230   -1.645186    2.290862 
C       3.161982   -0.214101    1.785689 
P       2.308655    0.092525    0.183157 
Ir      0.000000    0.028408    0.293208 
H      -0.000016   -0.804579   -1.034460 
C       2.873074    1.751018   -0.353272 
C       2.734872    2.825520    0.536051 
C       3.096087    4.110197    0.137896 
C       3.581702    4.336906   -1.150717 
C       3.703182    3.273025   -2.043671 
C       3.349435    1.983501   -1.648866 
C       3.172929   -1.068697   -0.939098 
C       2.471101   -2.030974   -1.667038 
C       3.153646   -2.935430   -2.481913 
C       4.542504   -2.882317   -2.574995 
C       5.251998   -1.922461   -1.849599 
C       4.571194   -1.022847   -1.035134 
C      -0.000113   -3.489920    0.663319 
C      -3.172980   -1.068632   -0.939037 
C      -2.471182   -2.030870   -1.667058 
C      -3.153764   -2.935311   -2.481919 
C      -4.542629   -2.882222   -2.574906 
C      -5.252093   -1.922407   -1.849427 
C      -4.571253   -1.022807   -1.034977 
H      -0.000178   -4.348388    1.346981 
H      -0.885743   -3.564251    0.024982 
H       0.885536   -3.564358    0.025019 
H       2.321244    2.659412    1.523125 
H       2.989054    4.935706    0.832596 
H       3.858094    5.339109   -1.458898 
H       4.073267    3.444461   -3.048418 
H       3.450607    1.159123   -2.344187 
H       5.127234   -0.274980   -0.481019 
H       6.332938   -1.876004   -1.919669 
H       5.072783   -3.584478   -3.208572 
H       2.598473   -3.680494   -3.040723 
H       1.393515   -2.068058   -1.585998 
H      -3.450850    1.159131   -2.344119 
H      -4.073423    3.444474   -3.048405 
H      -3.857889    5.339202   -1.459031 
H      -2.988583    4.935869    0.832376 
H      -2.320866    2.659563    1.522958 
H      -1.393591   -2.067938   -1.586087 
H      -2.598614   -3.680344   -3.040792 
H      -5.072936   -3.584371   -3.208473 
H      -6.333040   -1.875970   -1.919422 
H      -5.127272   -0.274973   -0.480798 
H       4.231286   -0.029484    1.650285 
H       2.763301    0.515316    2.495400 
H       3.631175   -1.841871    3.089541 
H       3.131141   -2.363363    1.493042 
H       1.449624   -2.815451    3.371266 
H       1.270610   -1.073033    3.569013 
H      -1.449706   -2.815327    3.371334 
H      -1.270593   -1.072912    3.569026 
H      -3.131252   -2.363204    1.493146 
H      -3.631212   -1.841633    3.089643 
H      -4.231266   -0.029263    1.650340 
H      -2.763233    0.515488    2.495401 
Cl      0.000065    1.477809    2.391696 

72
REACTION E. SYN_ISOMER, PBE-D2, 
G_raw (298.15 K) =    -2737.993091 Hartree
C      -2.700406    2.836998    0.525307 
C      -2.866393    1.752779   -0.357357 
C      -3.378609    1.976307   -1.647523 
C      -3.743154    3.269355   -2.041991 
C      -3.596527    4.343545   -1.155738 
C      -3.073252    4.124430    0.125990 
P      -2.294694    0.091583    0.184912 
C      -3.161985   -0.209314    1.788918 
C      -2.911011   -1.640404    2.295527 
C      -1.489271   -1.850698    2.841370 
Si     -0.000020   -1.866621    1.642934 
C       1.489250   -1.850756    2.841347 
C       2.910986   -1.640493    2.295484 
C       3.161992   -0.209402    1.788898 
P       2.294695    0.091546    0.184904 
Ir      0.000000    0.033654    0.298595 
H      -0.000009   -0.794257   -1.042871 
C       2.866428    1.752739   -0.357335 
C       2.700545    2.836936    0.525373 
C       3.073415    4.124366    0.126071 
C       3.596612    4.343501   -1.155685 
C       3.743134    3.269333   -2.041983 
C       3.378564    1.976288   -1.647531 
C       3.166508   -1.073219   -0.938279 
C       2.460033   -2.032217   -1.677857 
C       3.145311   -2.938552   -2.497766 
C       4.541255   -2.890281   -2.583839 
C       5.254409   -1.933660   -1.846931 
C       4.571441   -1.031002   -1.026541 
C      -0.000060   -3.498401    0.673432 
C      -3.166535   -1.073185   -0.938246 
C      -2.460077   -2.032162   -1.677868
[truncated: 539,370 more chars]
